# Supplementary material for: Preparation of 3-hydroxyquinolines from direct oxidation of dihydroquinolinium salts
Source: Royal Society of Chemistry journal article supplement (doi:10.1039/c8ra07940d), 2018-01-01
Supplement: c8ra07940d1.pdf [file c8ra07940d1.pdf]

## **Supporting Information**

### **Preparation of 3-Hydroxyquinolines From Direct Oxidation of Dihydroquinolinium Salts**

Mani Ramanathan, Jing Wan and Shih-Tzung Liu\*

Department of Chemistry, National Taiwan University, Taipei 106, Taiwan

Contents:

Copies of  $^1\text{H}$  and  $^{13}\text{C}$  NMR Spectra-----S1-S66

Phdiazonium salt, Dry Styrene, Dry MeCN, 80deg, 2h, ether washed pale yellow solid

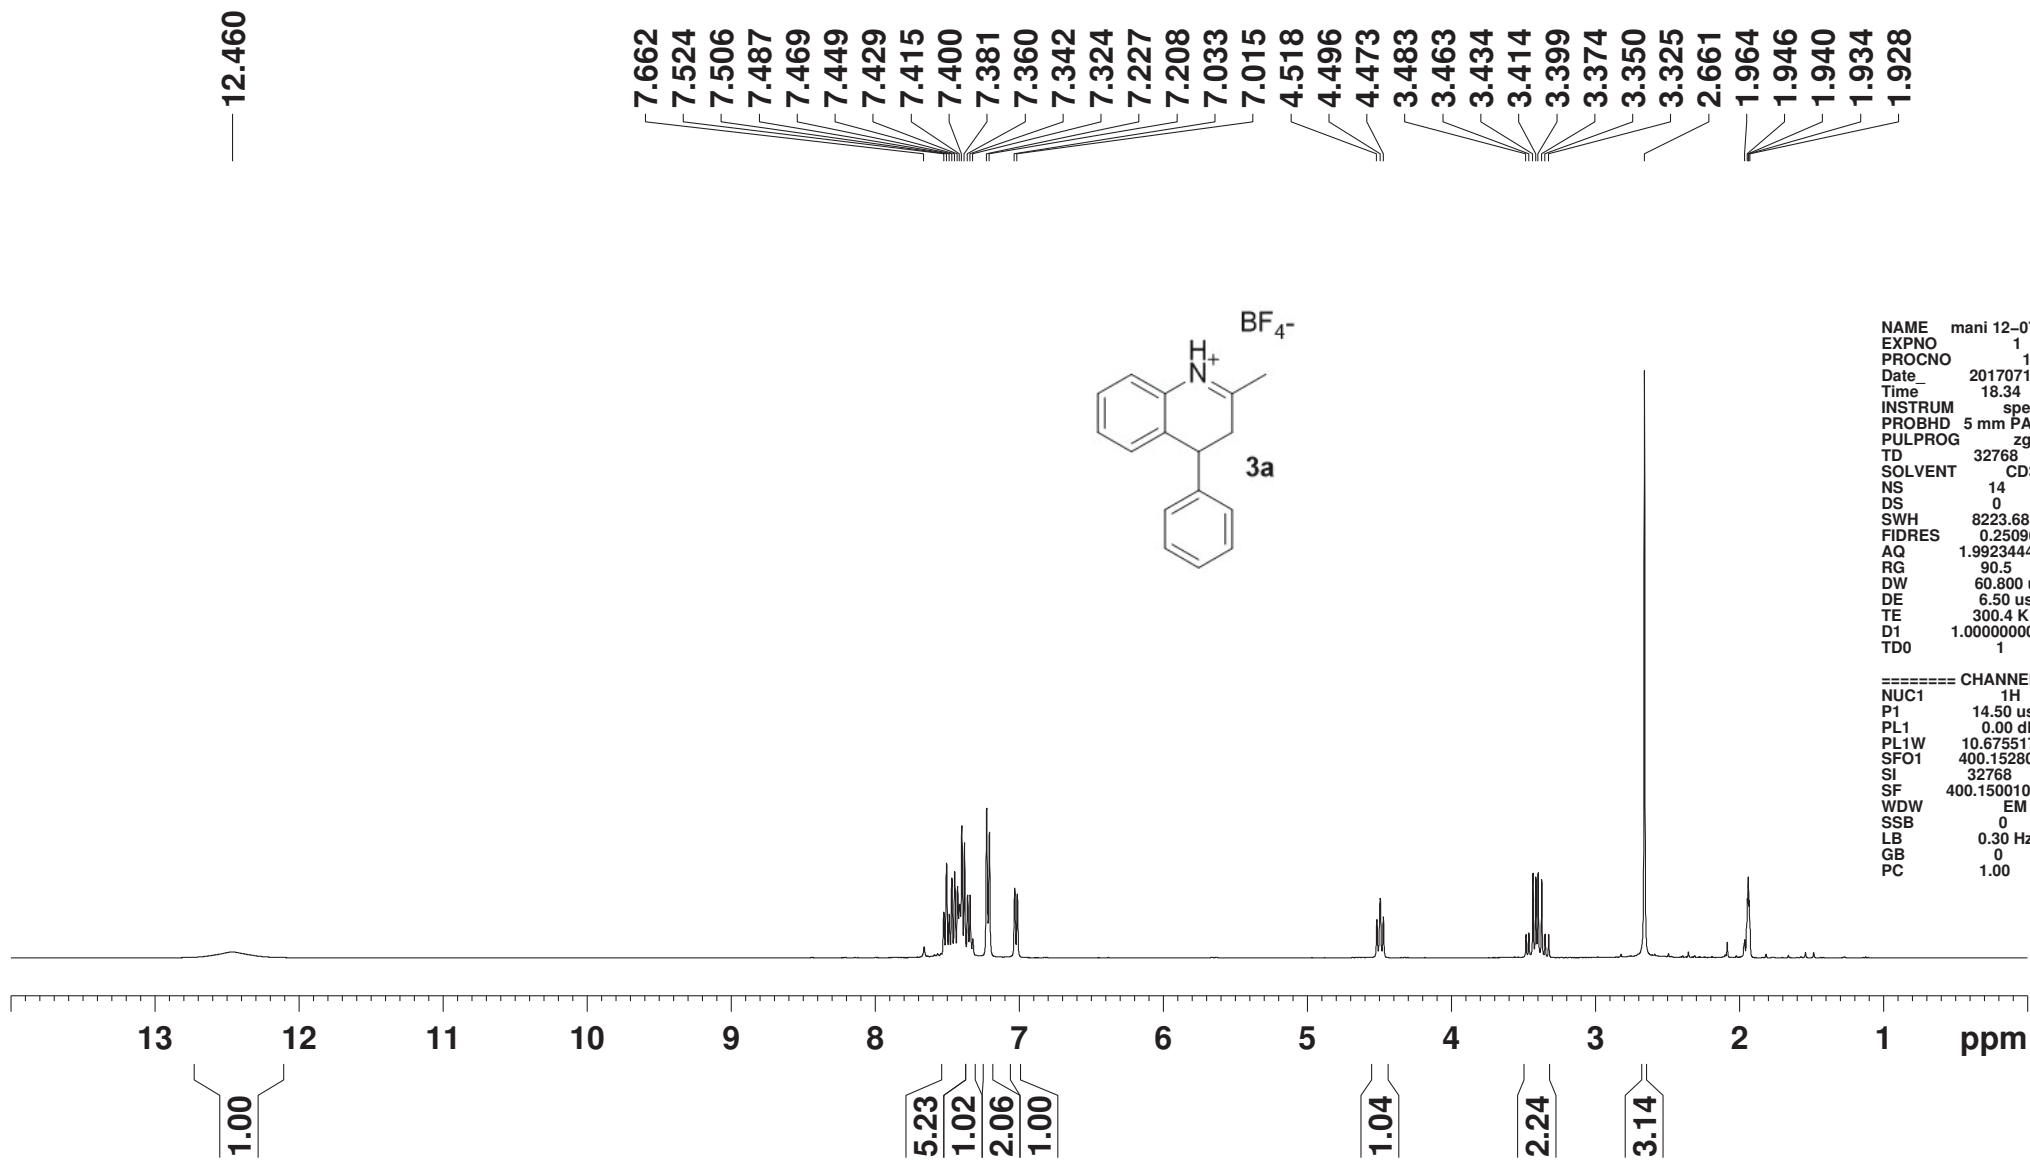

NAME mani 12-07-2  
 EXPNO 1  
 PROCNO 1  
 Date\_ 20170712  
 Time 18.34  
 INSTRUM spect  
 PROBHD 5 mm PABB  
 PULPROG zg30  
 TD 32768  
 SOLVENT CD3CN  
 NS 14  
 DS 0  
 SWH 8223.685 H  
 FIDRES 0.250967  
 AQ 1.9923444 se  
 RG 90.5  
 DW 60.800 usec  
 DE 6.50 usec  
 TE 300.4 K  
 D1 1.00000000 se  
 TD0 1

===== CHANNEL f1  
 NUC1 1H  
 P1 14.50 usec  
 PL1 0.00 dB  
 PL1W 10.67551708  
 SFO1 400.1528010  
 SI 32768  
 SF 400.1500104 M  
 WDW EM  
 SSB 0  
 LB 0.30 Hz  
 GB 0  
 PC 1.00

Phdiazonium salt, Dry Styrene, Dry MeCN, 80deg, 2h, ether washed pale yellow solid

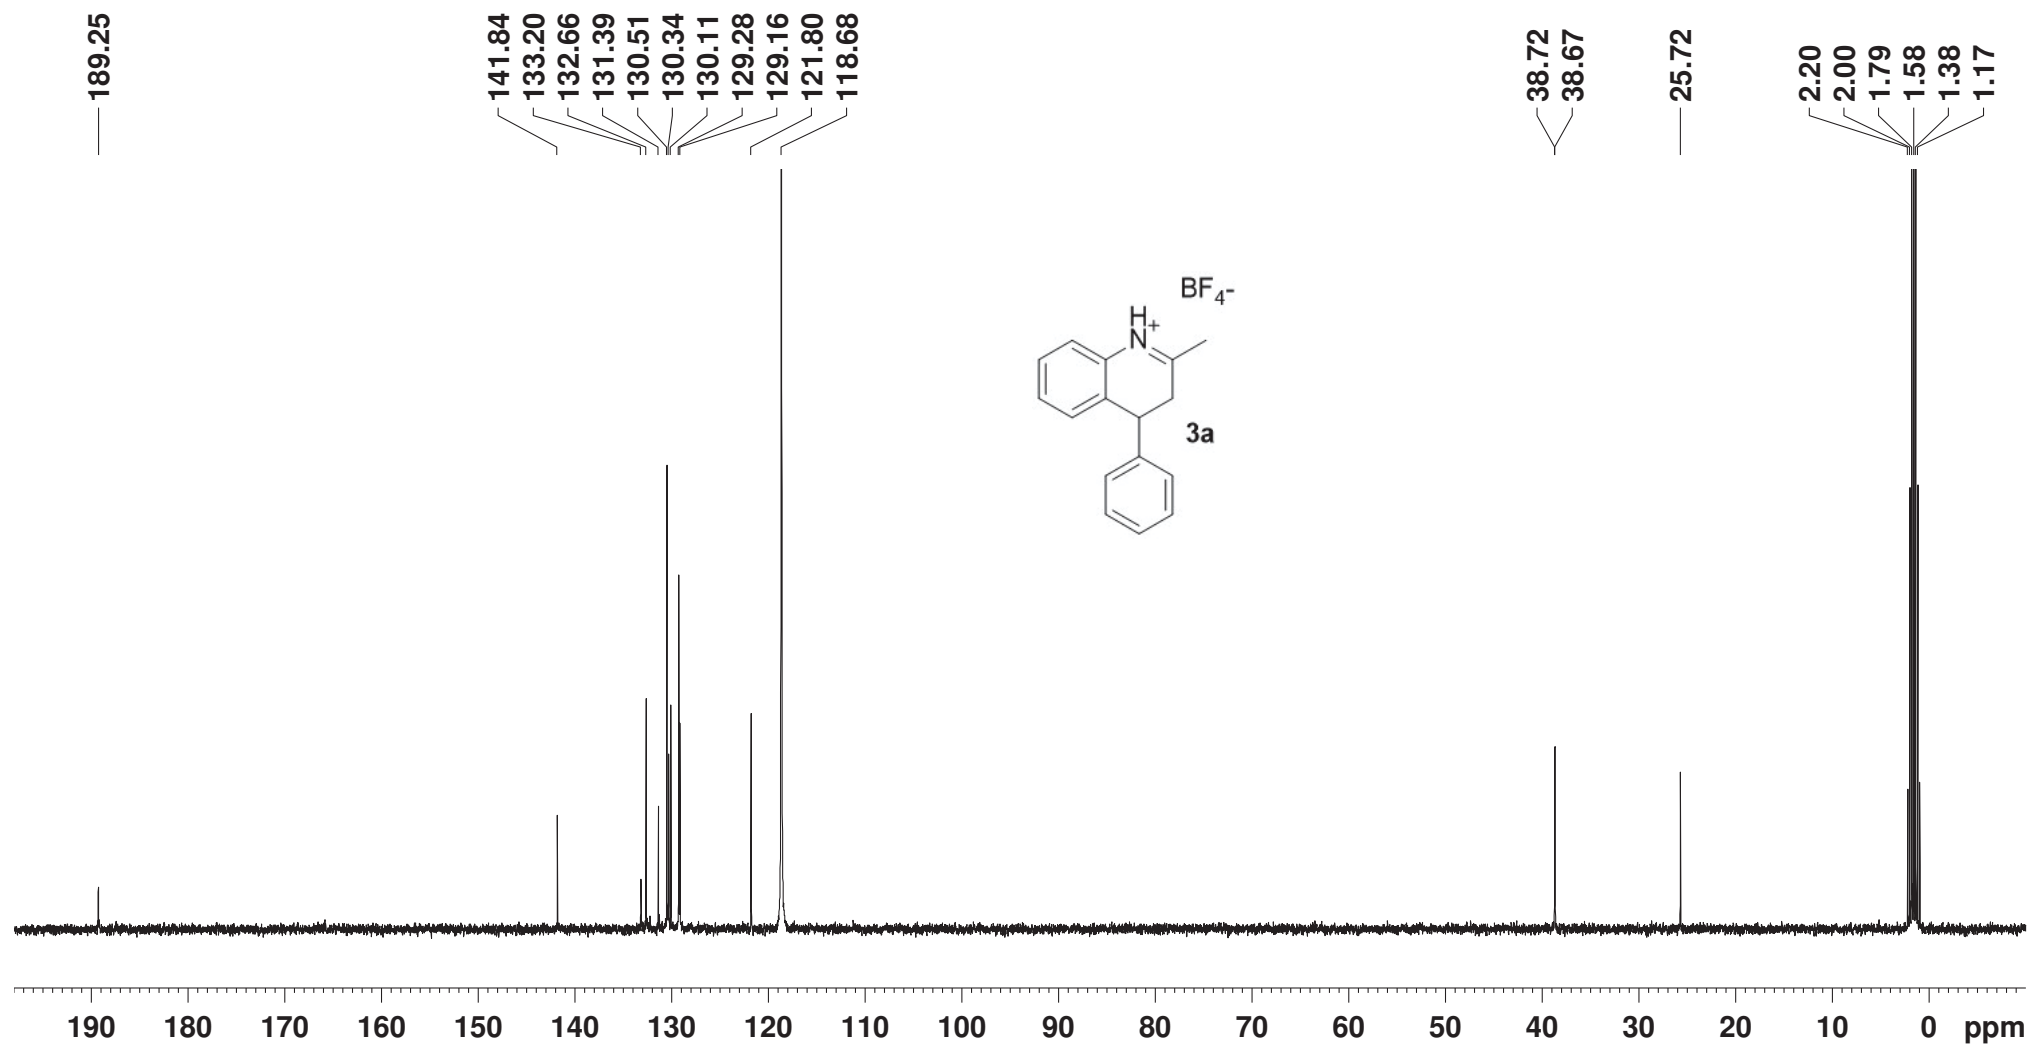

4-MePhdiazonium salt, dry MeCN, styrene, 80deg, 2h, pale yellow solid

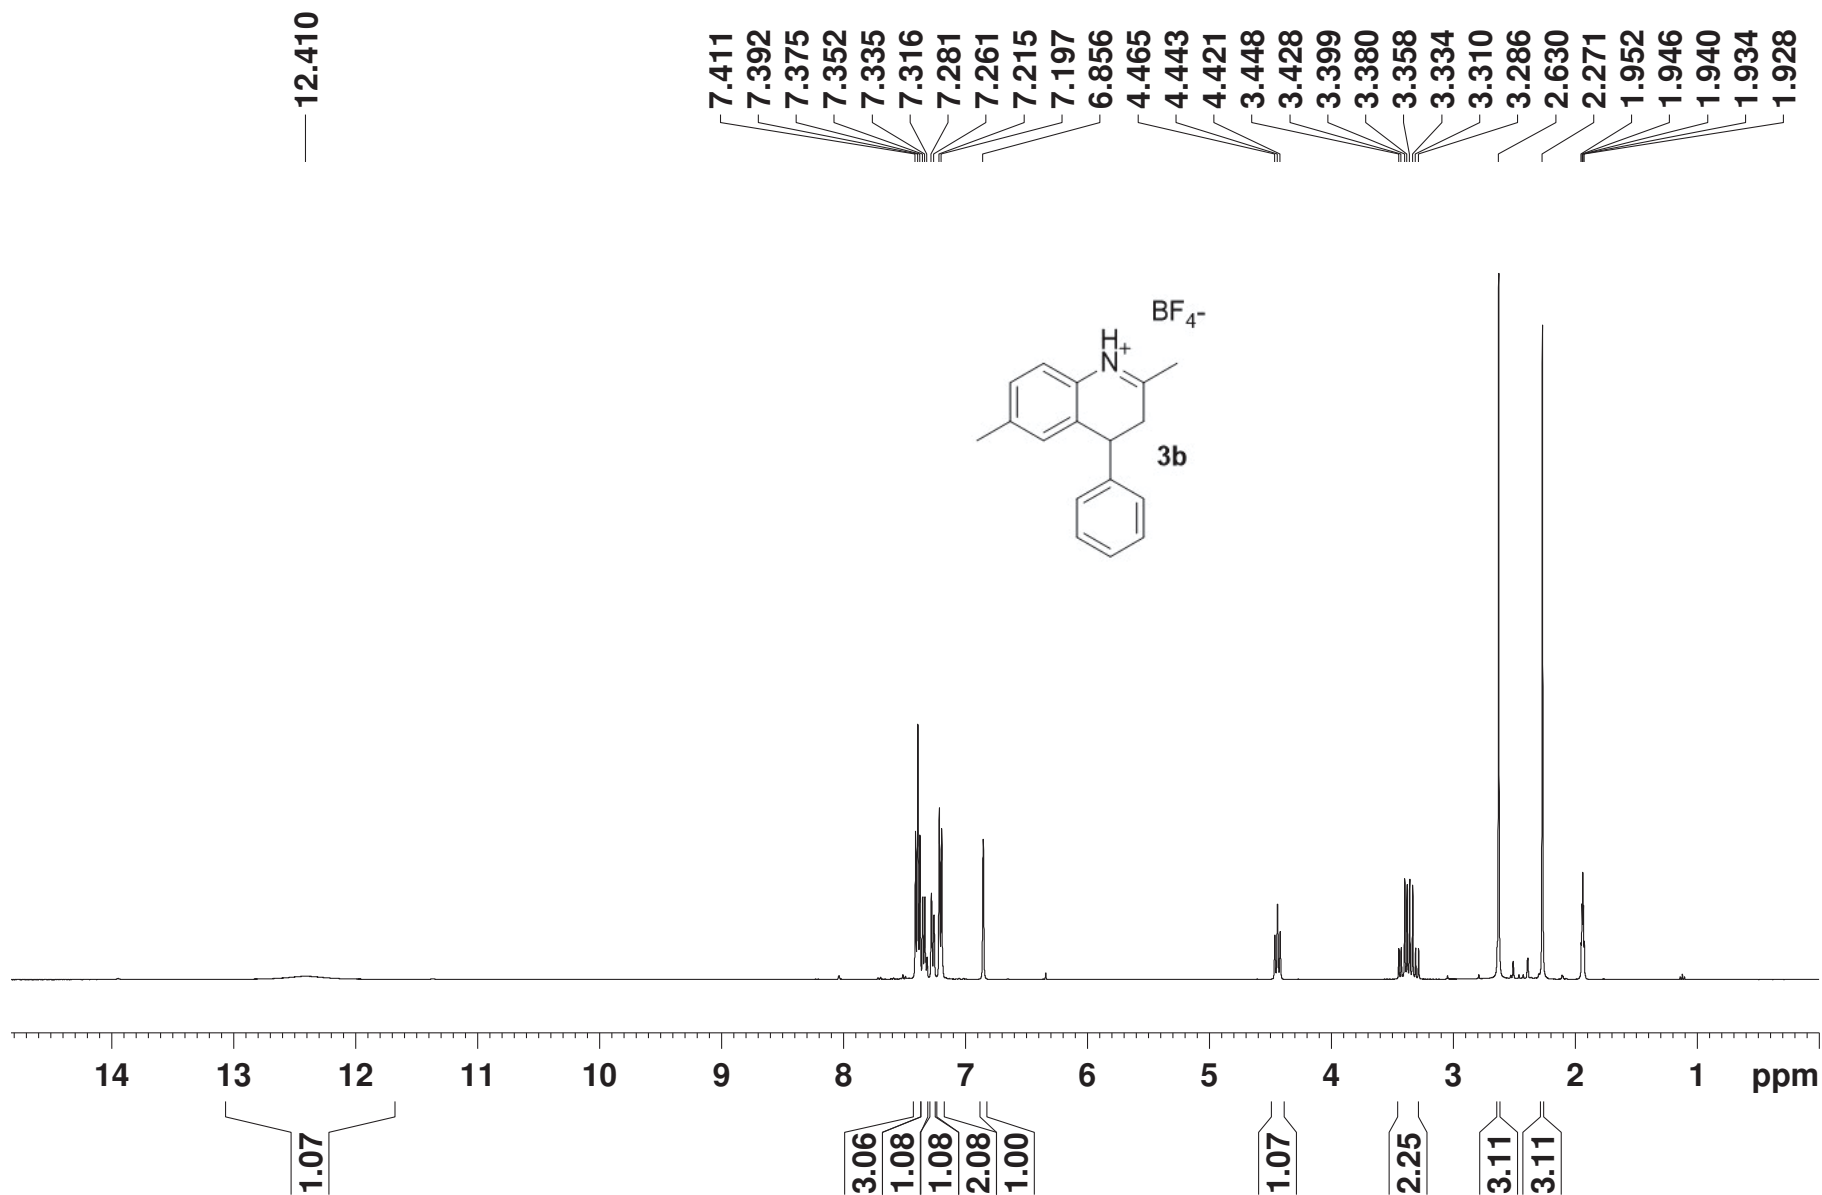

NAME mani 02-10-201  
EXPNO 5  
PROCNO 1  
Date\_ 20171002  
Time 22.18 h  
INSTRUM spect  
PROBHD Z108618.0411  
PULPROG zg30  
TD 32768  
SOLVENT CD3CN  
NS 30  
DS 0  
SWH 8802.817 Hz  
FIDRES 0.537281 Hz  
AQ 1.8612725 sec  
RG 62.98  
DW 56.800 usec  
DE 14.47 usec  
TE 299.0 K  
D1 1.0000000 sec  
TD0 1  
SFO1 400.1328009 MHz  
NUC1 1H  
P1 15.50 usec  
SI 131072  
SF 400.1300112 MHz  
WDW EM  
SSB 0  
LB 0.00 Hz  
GB 0  
PC 1.00

4-MePhdiazonium salt, dry MeCN, styrene, 80deg, 2h, pale yellow solid

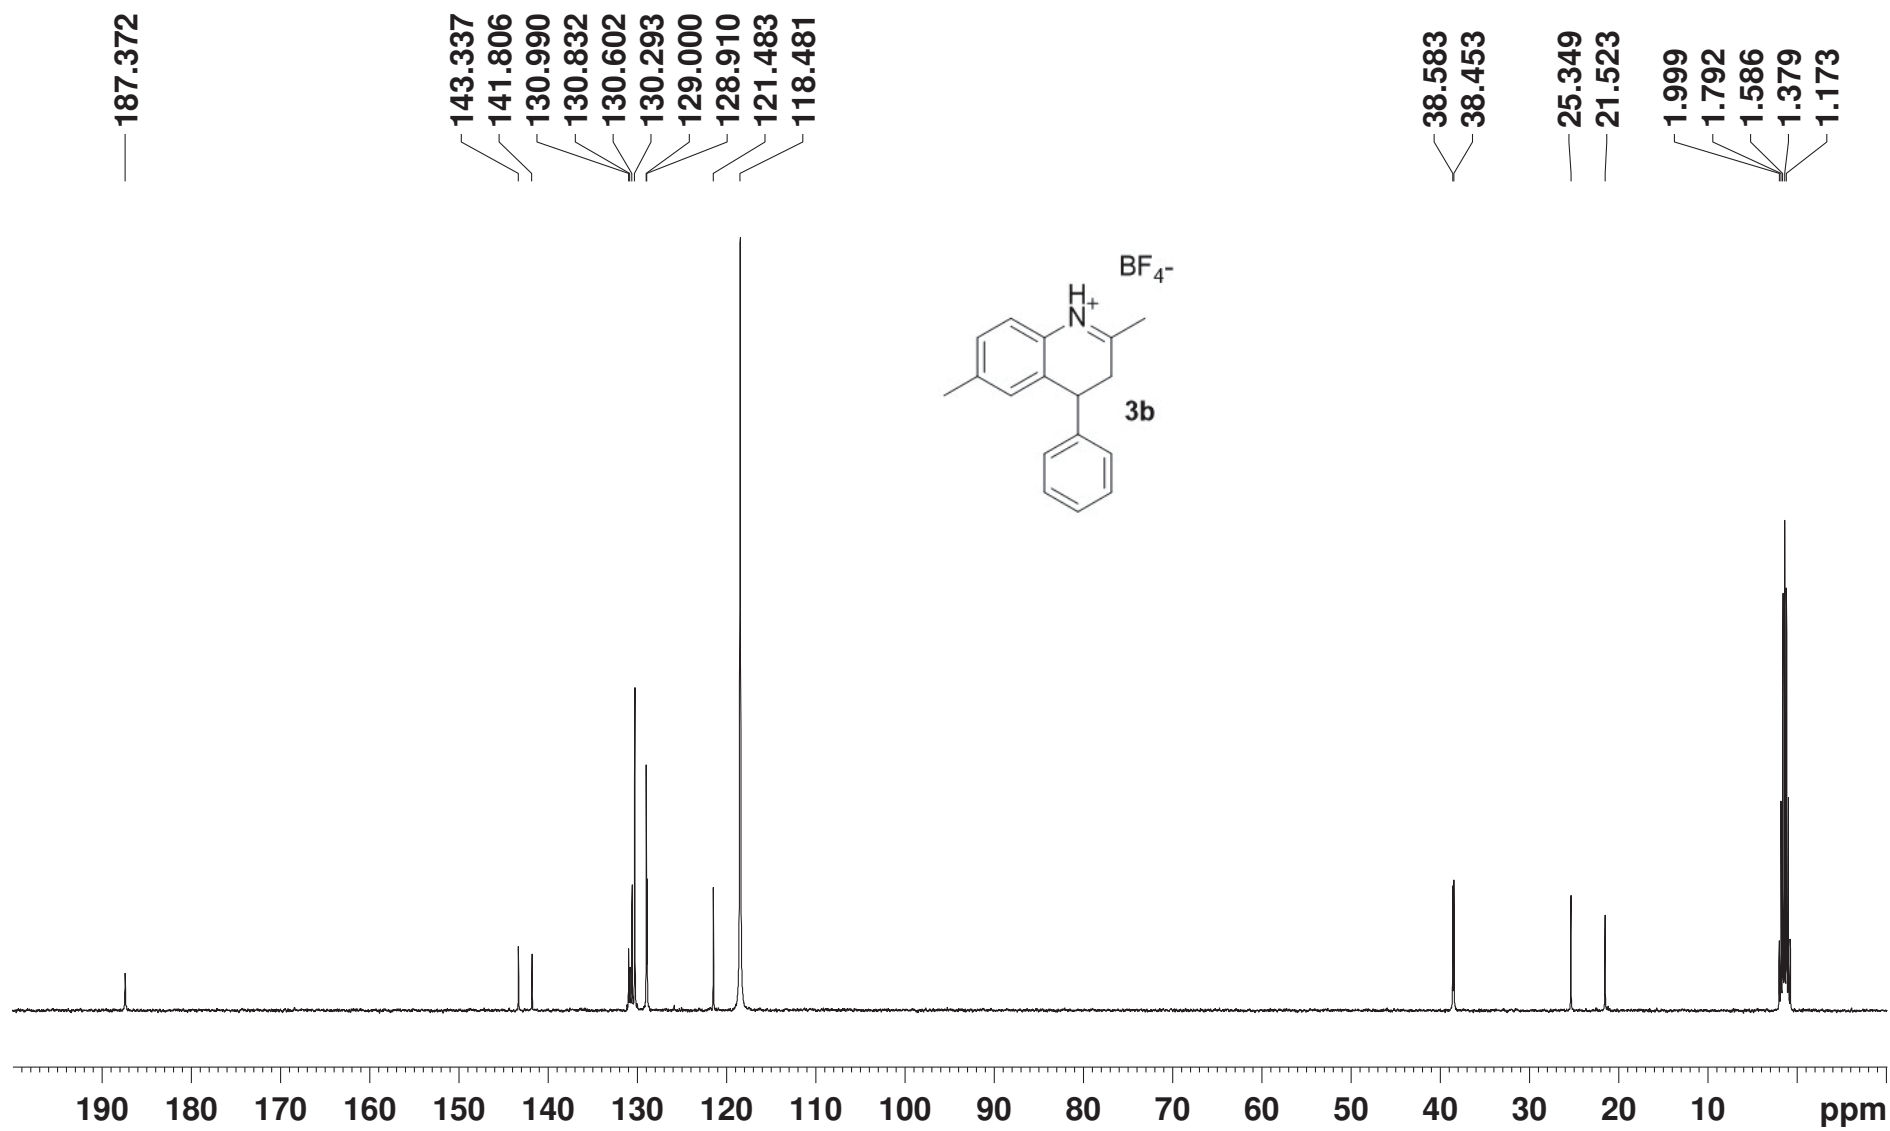

4-MePhdiazonium salt, dry PhCN, styrene, 80deg, 2h, bright yellow solid

8.078  
8.075  
8.073  
8.062  
8.057  
8.053  
7.880  
7.866  
7.862  
7.858  
7.846  
7.843  
7.840  
7.721  
7.716  
7.702  
7.700  
7.686  
7.680  
7.678  
7.657  
7.415  
7.412  
7.399  
7.394  
7.390  
7.379  
7.376  
7.363  
7.360  
7.358  
7.354  
7.351  
7.347  
7.342  
7.339  
7.333  
7.271  
7.267  
7.262  
7.253  
7.250  
4.639  
4.618  
4.597  
3.879  
3.867  
3.860  
3.844  
2.331  
1.952  
1.946  
1.939  
1.933  
1.927

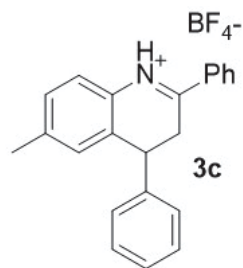

NAME mani 05-10-2f  
EXPNO 1  
PROCNO 1  
Date\_ 20171005  
Time 12.11 h  
INSTRUM spect  
PROBHD Z108618\_041  
PULPROG zg30  
TD 32768  
SOLVENT CD3CN  
NS 30  
DS 0  
SWH 8802.817 Hz  
FIDRES 0.537281 Hz  
AQ 1.8612725 sec  
RG 103.36  
DW 56.800 usec  
DE 14.47 usec  
TE 299.2 K  
D1 1.0000000 sec  
TD0 1  
SFO1 400.1328009 MHz  
NUC1 1H  
P1 15.50 usec  
SI 131072  
SF 400.1300115 MHz  
WDW EM  
SSB 0  
LB 0.00 Hz  
GB 0  
PC 1.00

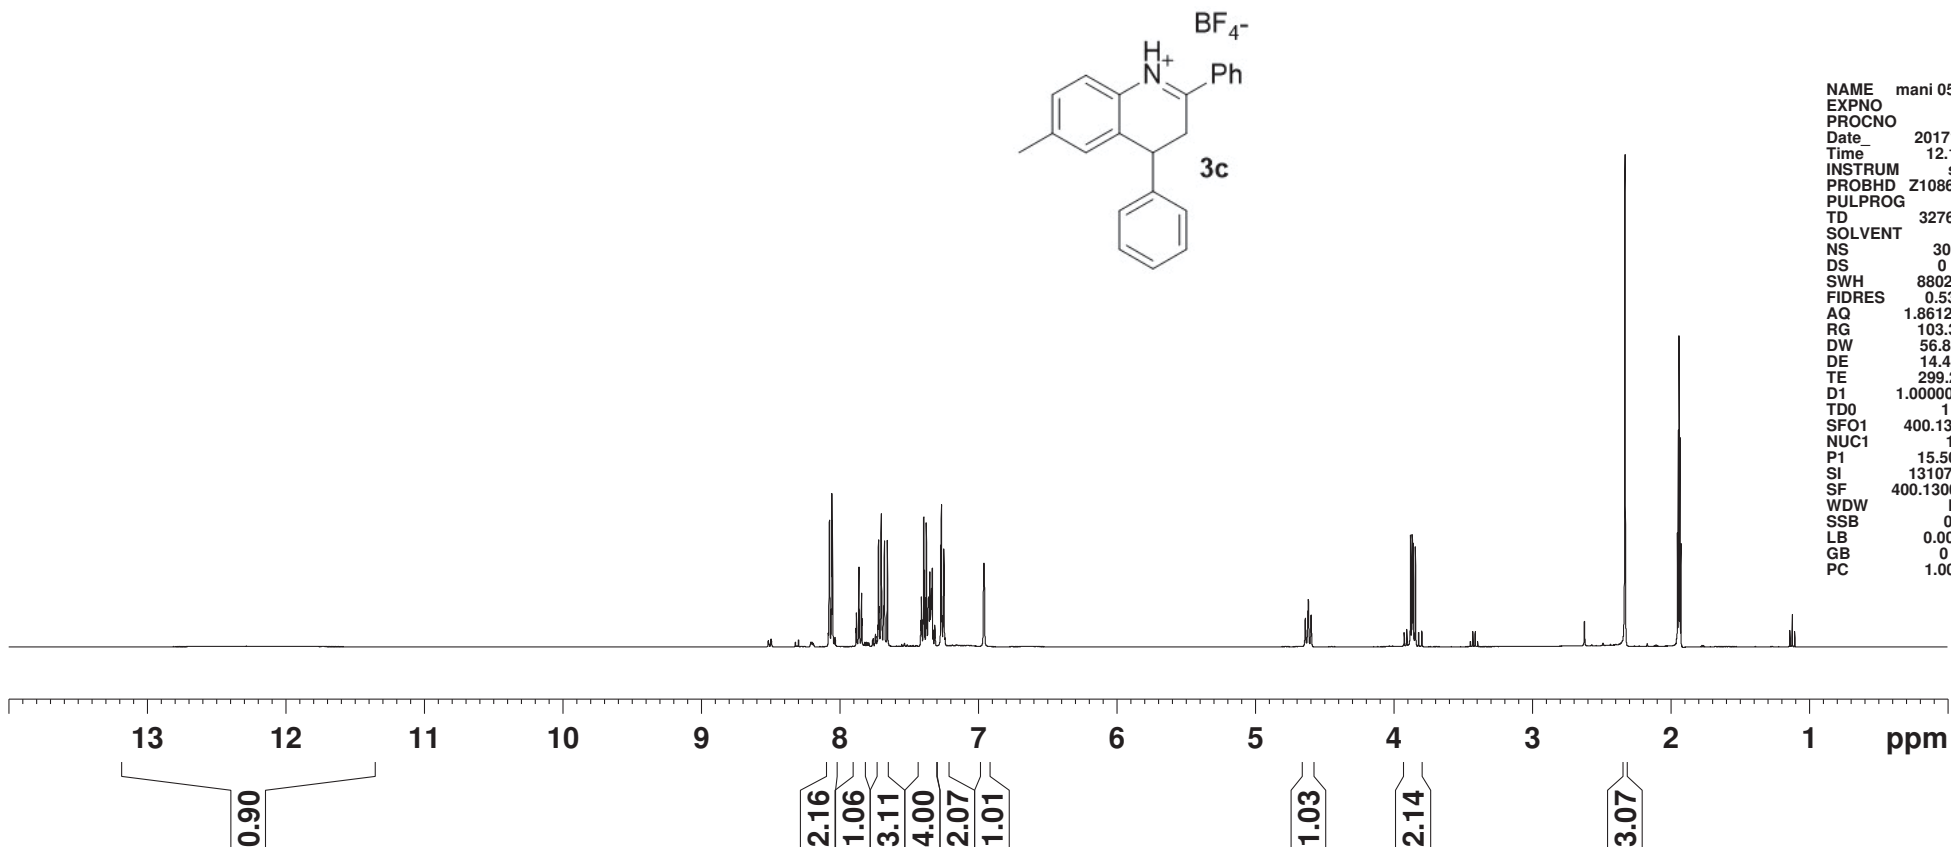

4-MePhdiazonium salt, dry PhCN, styrene, 80deg, 2h, bright yellow solid

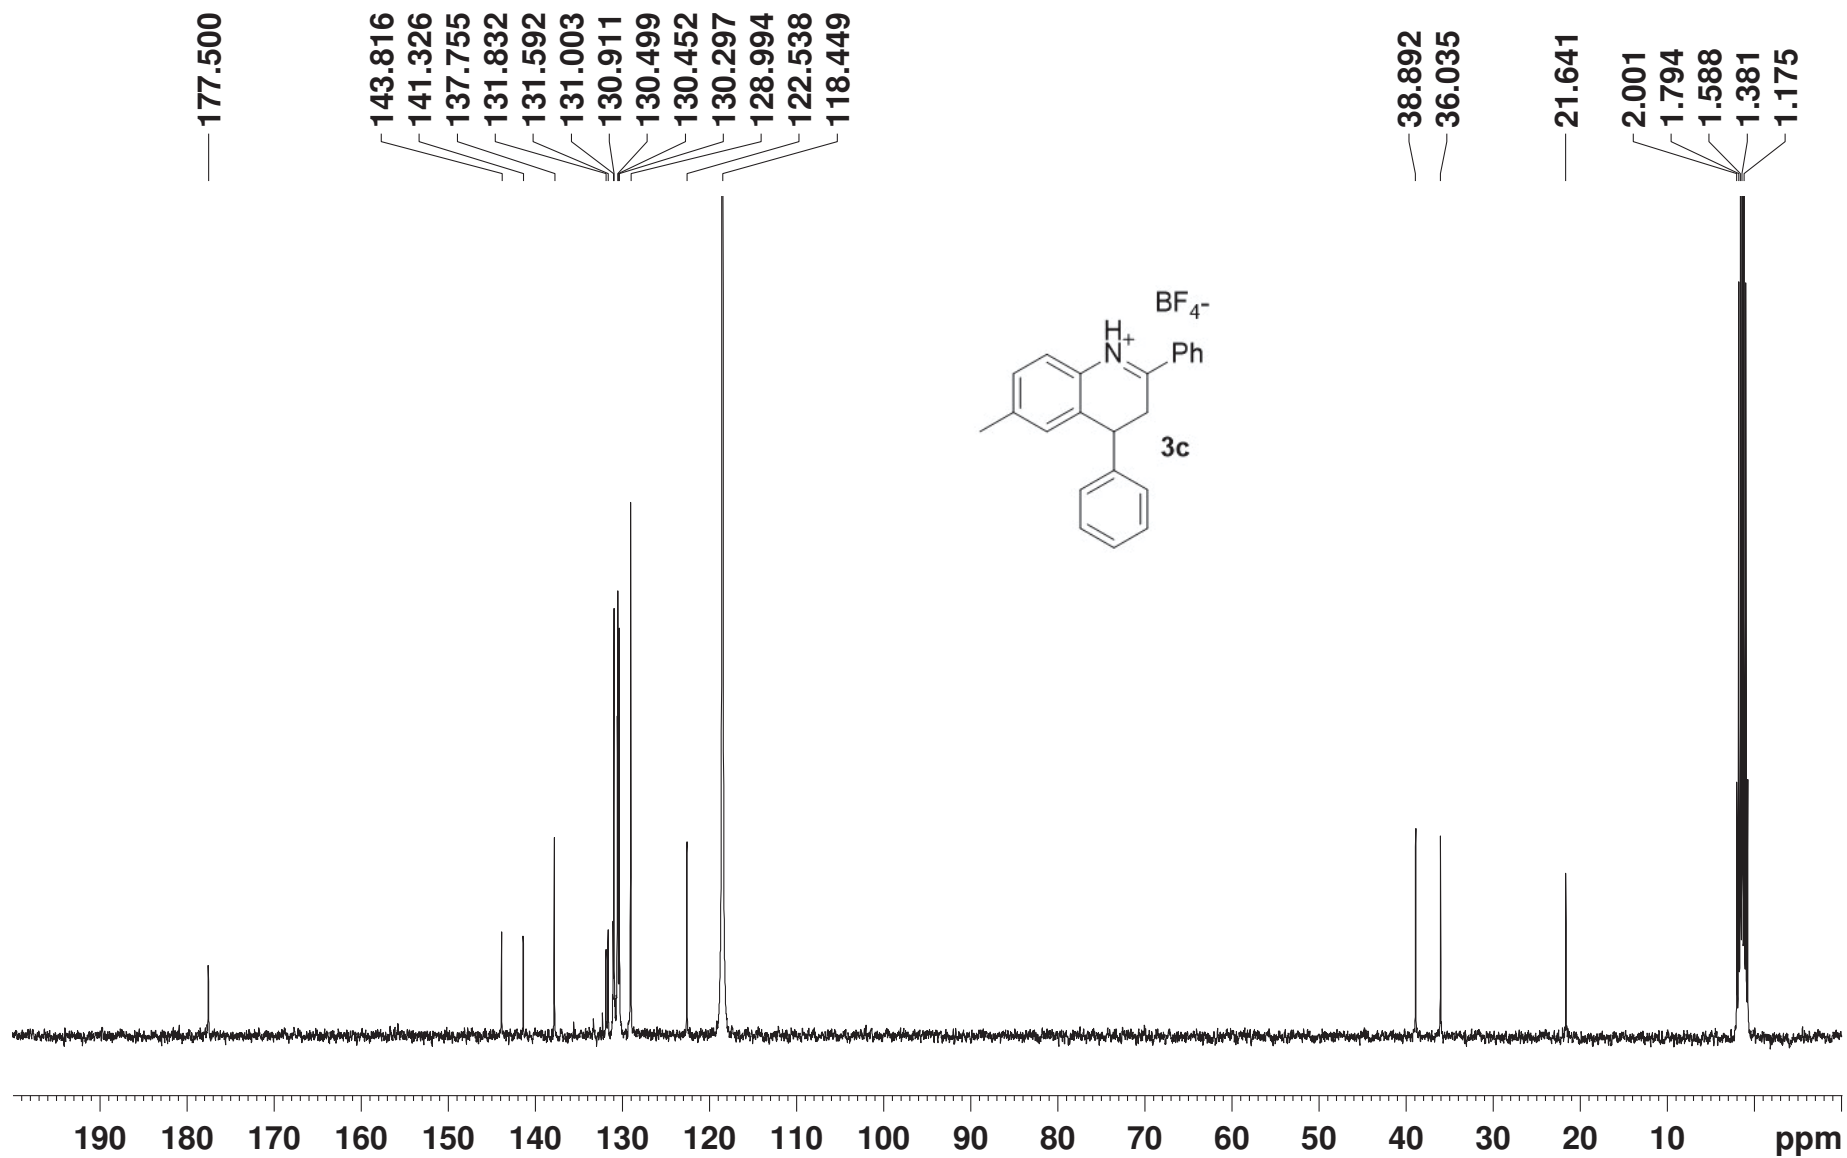

4-tBuPhdiazonium salt , Styrene, Dry MeCN, 80deg, 2h, pale yellow solid

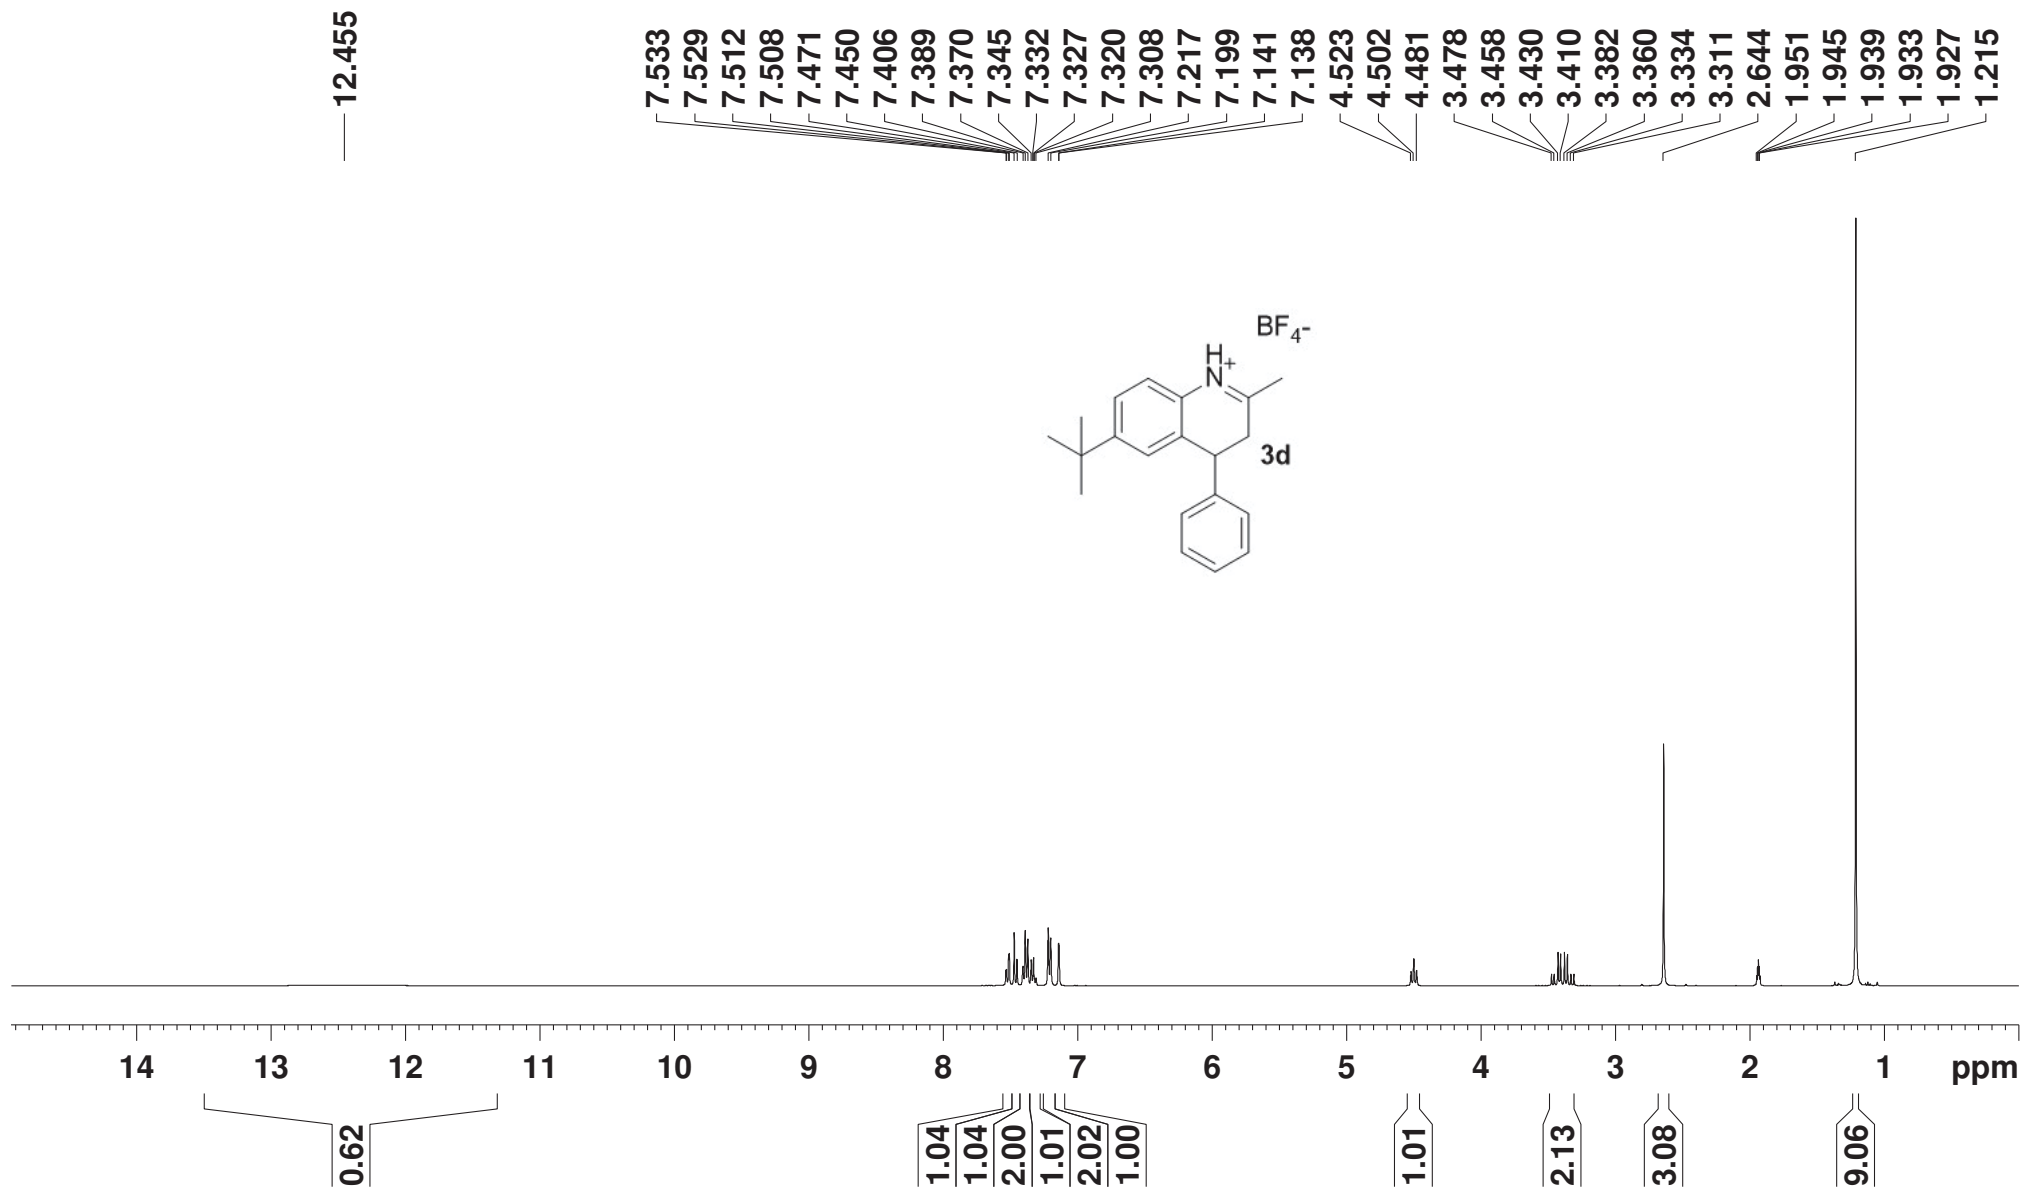



4-tBuPhdiazonium salt , Styrene, Dry MeCN, 80deg, 2h, pale yellow solid

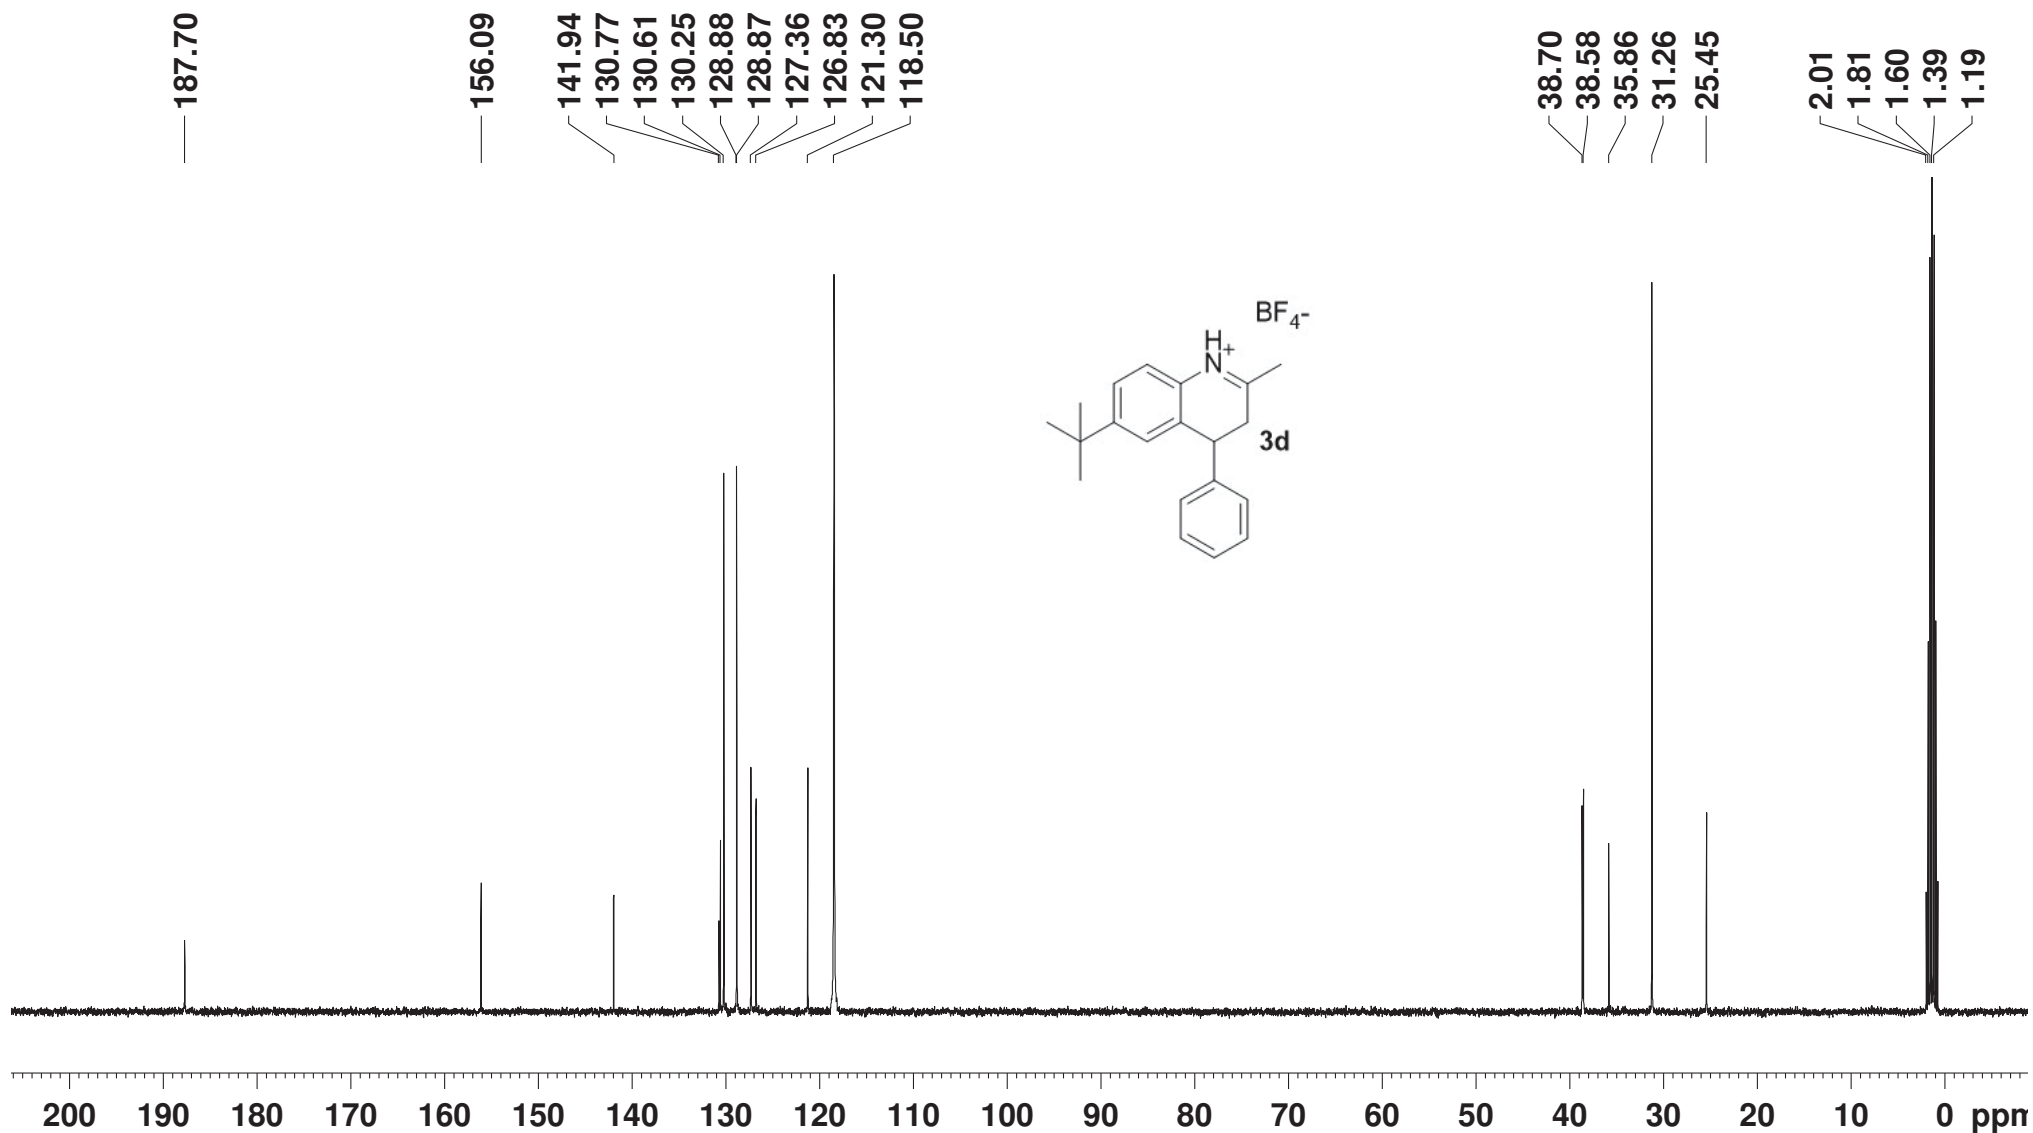

Phdiazonium salt, styrene, Dry BuCN, 80deg, 2h, bright yellow solid

7.603 7.584 7.519 7.501 7.480 7.460 7.442 7.401 7.383 7.365 7.345 7.327 7.309 7.183 7.165 7.092 7.074 4.540 4.520 4.499 3.498 3.479 3.450 3.437 3.432 3.416 3.389 3.368 2.914 2.910 2.895 2.872 2.853 2.832 2.815 2.797 1.946 1.940 1.934 1.753 1.736 1.717 1.699 1.690 1.680 1.672 1.653 1.635 1.617 0.947 0.928 0.910

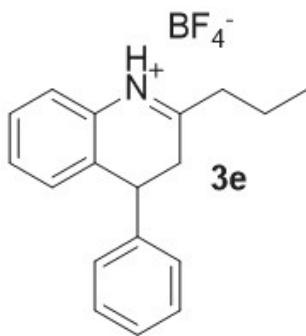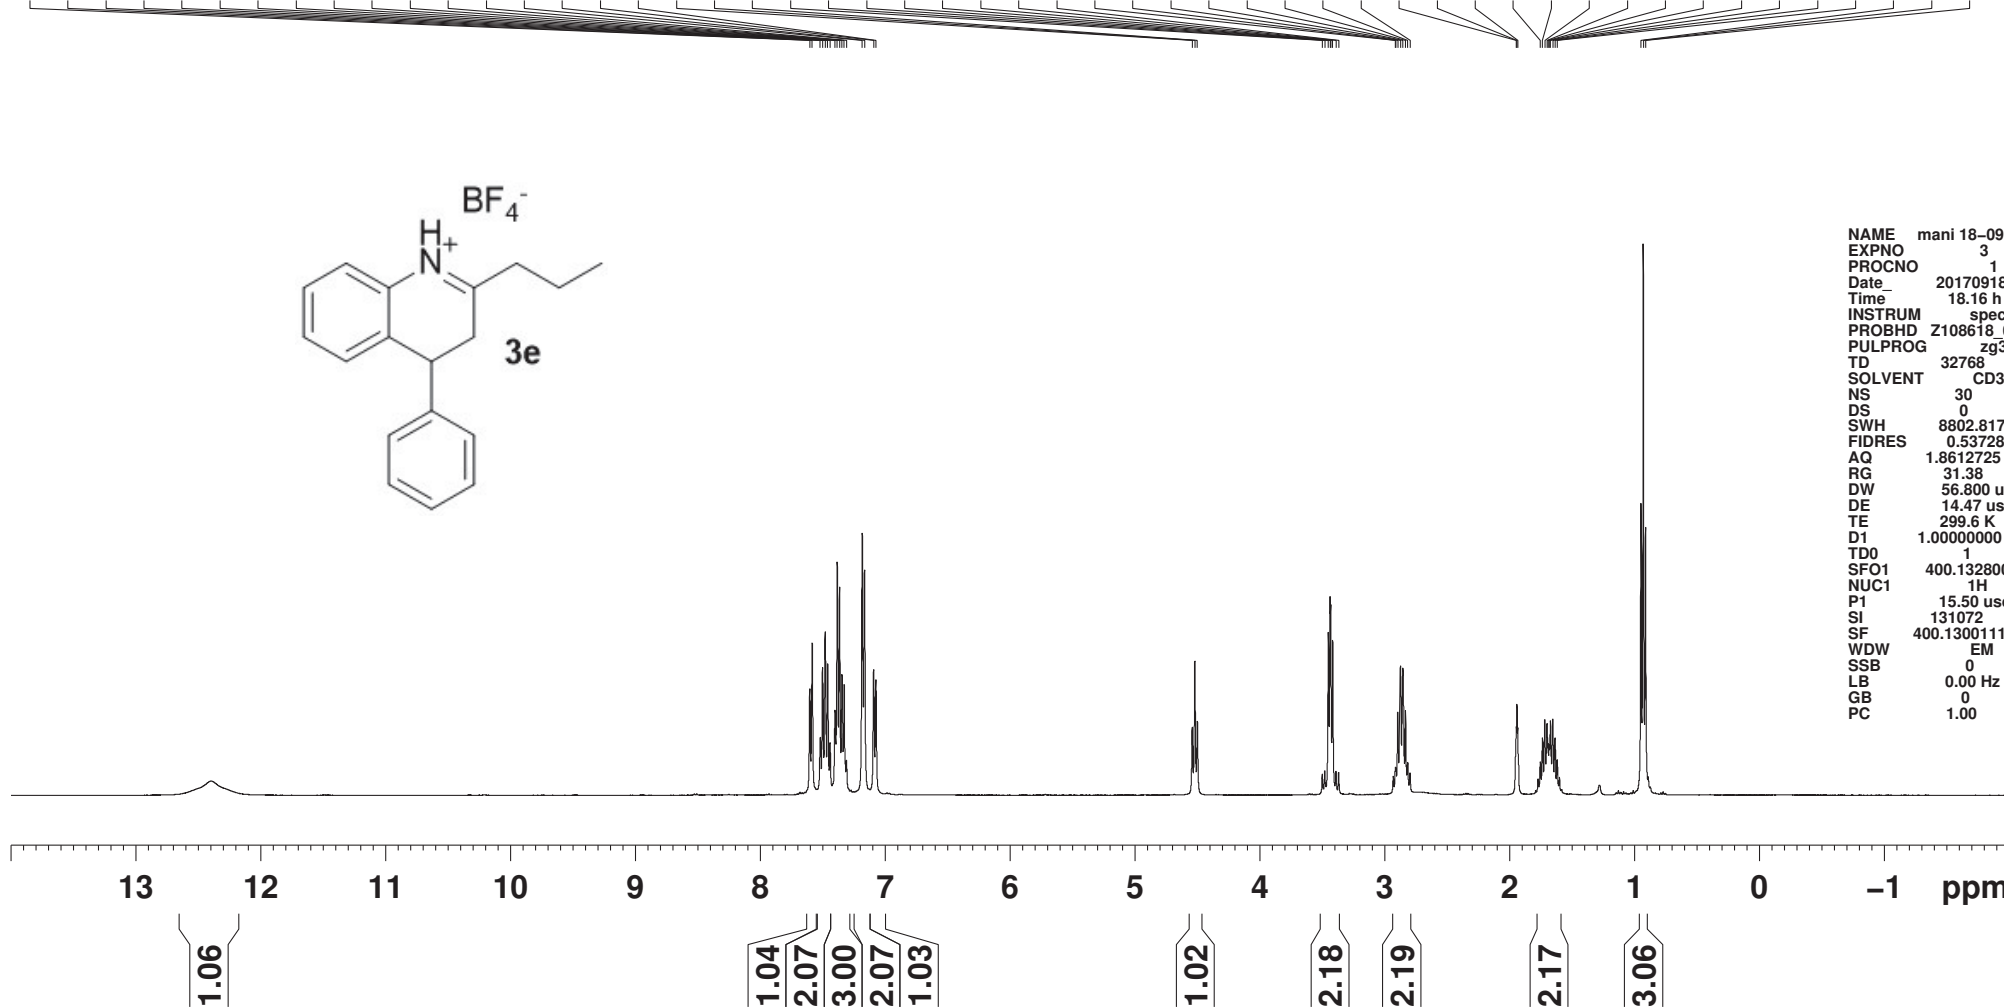

```

NAME mani 18-09
EXPNO 3
PROCNO 1
Date_ 20170918
Time 18.16 h
INSTRUM spec
PROBHD Z108618.1
PULPROG zg3
TD 32768
SOLVENT CD3
NS 30
DS 0
SWH 8802.817
FIDRES 0.53728
AQ 1.8612725
RG 31.38
DW 56.800 u
DE 14.47 us
TE 299.6 K
D1 1.0000000
TD0 1
SFO1 400.132800
NUC1 1H
P1 15.50 us
SI 131072
SF 400.1300111
WDW EM
SSB 0
LB 0.00 Hz
GB 0
PC 1.00
    
```

Phdiazonium salt, styrene, Dry BuCN, 80deg, 2h, bright yellow solid

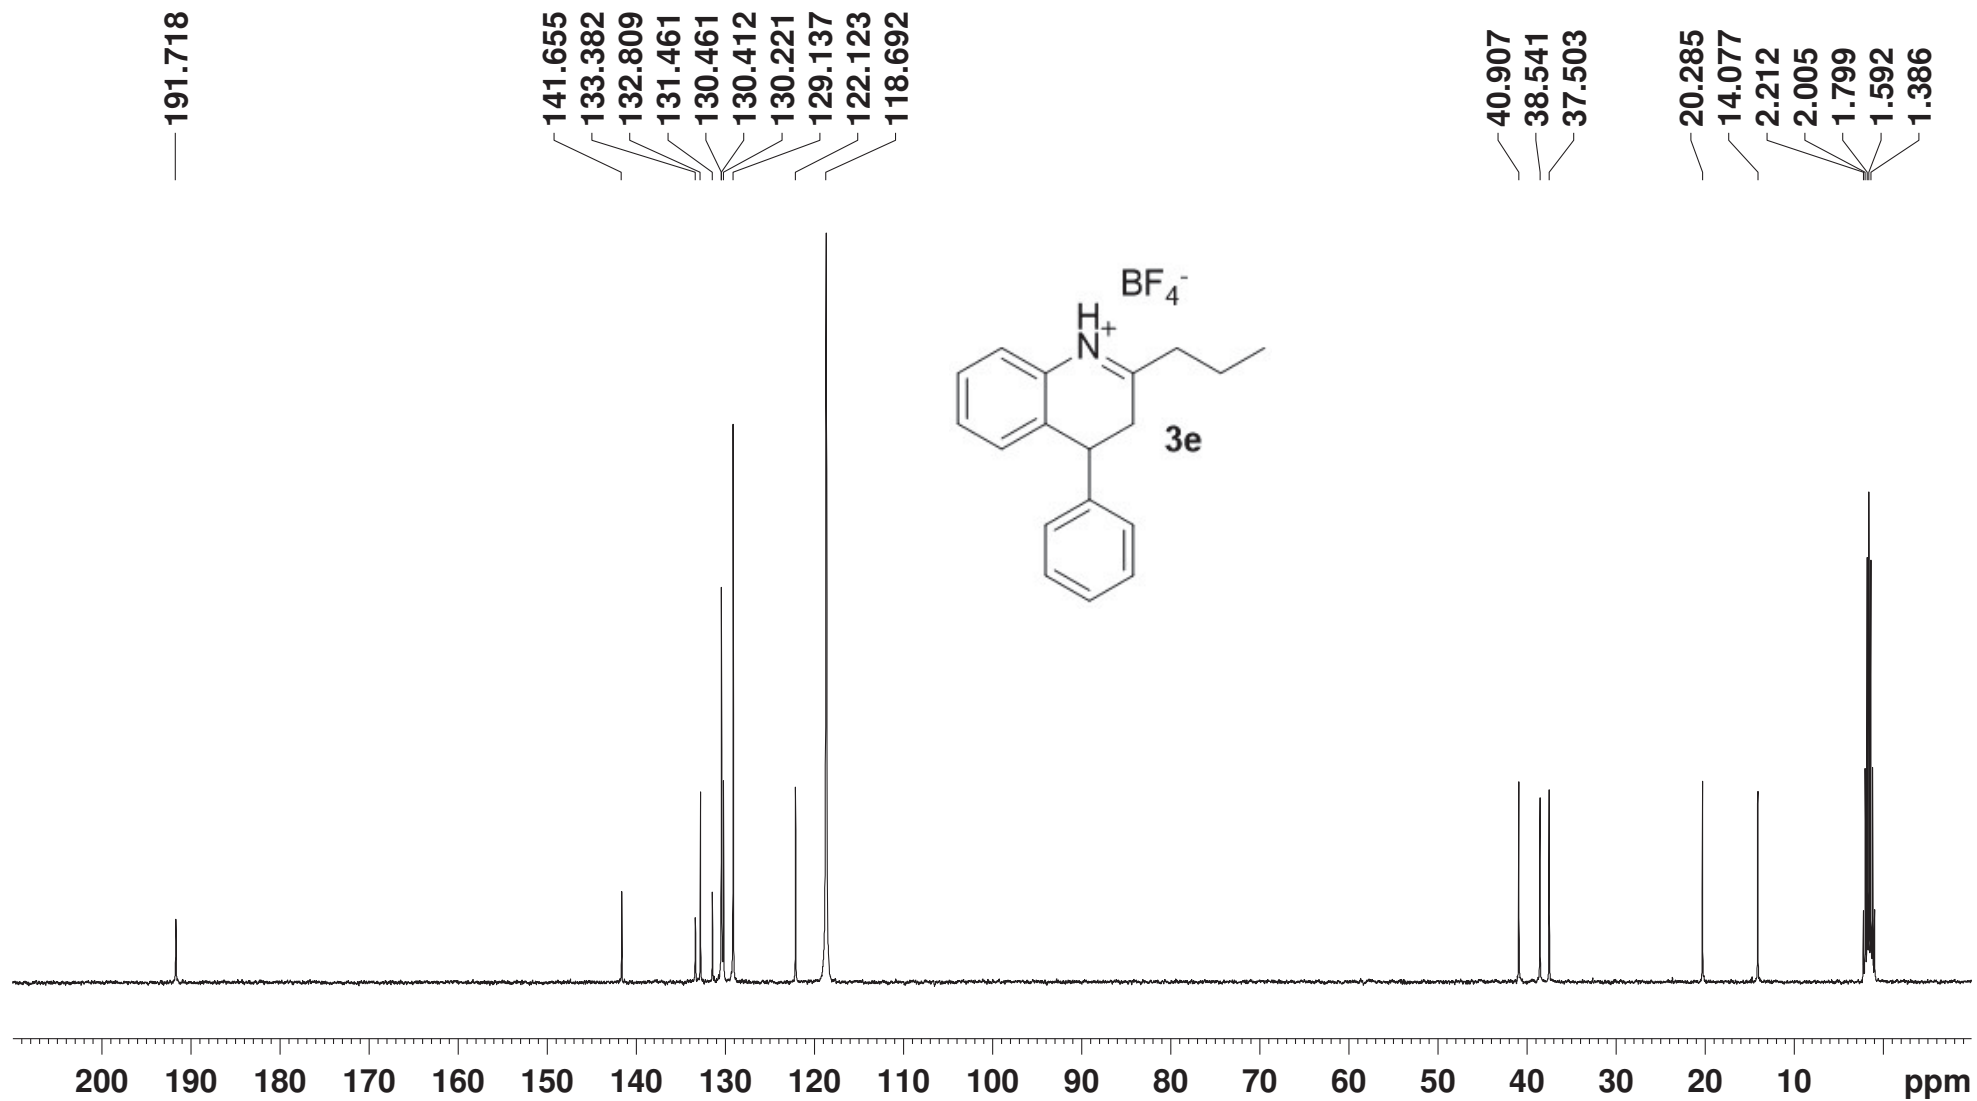

Phdiazonium salt, styrene, Dry tBuCN, 80deg, 2h, yellow solid

7.672 7.669 7.651 7.539 7.537 7.520 7.518 7.502 7.497 7.493 7.478 7.475 7.459 7.395 7.378 7.359 7.340 7.327 7.322 7.314 7.304 7.161 7.143 7.125 7.106 4.556 4.536 4.517 3.477 3.457 3.430 3.424 3.410 3.404 3.377 3.357 3.207 3.190 3.172 3.156 3.138 1.952 1.946 1.940 1.934 1.928 1.284 1.267 1.157 1.140

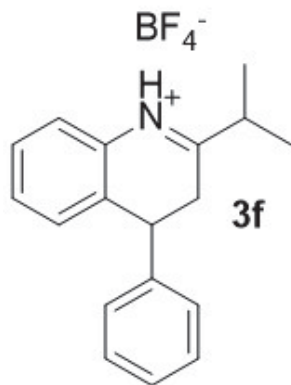

```

NAME  mani 21-09-2
EXPNO  1
PROCNO  1
Date_  20170921
Time    16.09 h
INSTRUM  spect
PROBHD  Z108618_04
PULPROG  zg30
TD       32768
SOLVENT  CD3CN
NS       30
DS       0
SWH      8802.817 H
FIDRES   0.537281 H
AQ       1.8612725 se
RG       31.38
DW       56.800 usec
DE       14.47 usec
TE       298.9 K
D1       1.0000000 se
TD0      1
SFO1     400.1328009
NUC1     1H
P1       15.50 usec
SI       131072
SF       400.1300109 M
WDW      EM
SSB      0
LB       0.00 Hz
GB       0
PC       1.00
    
```

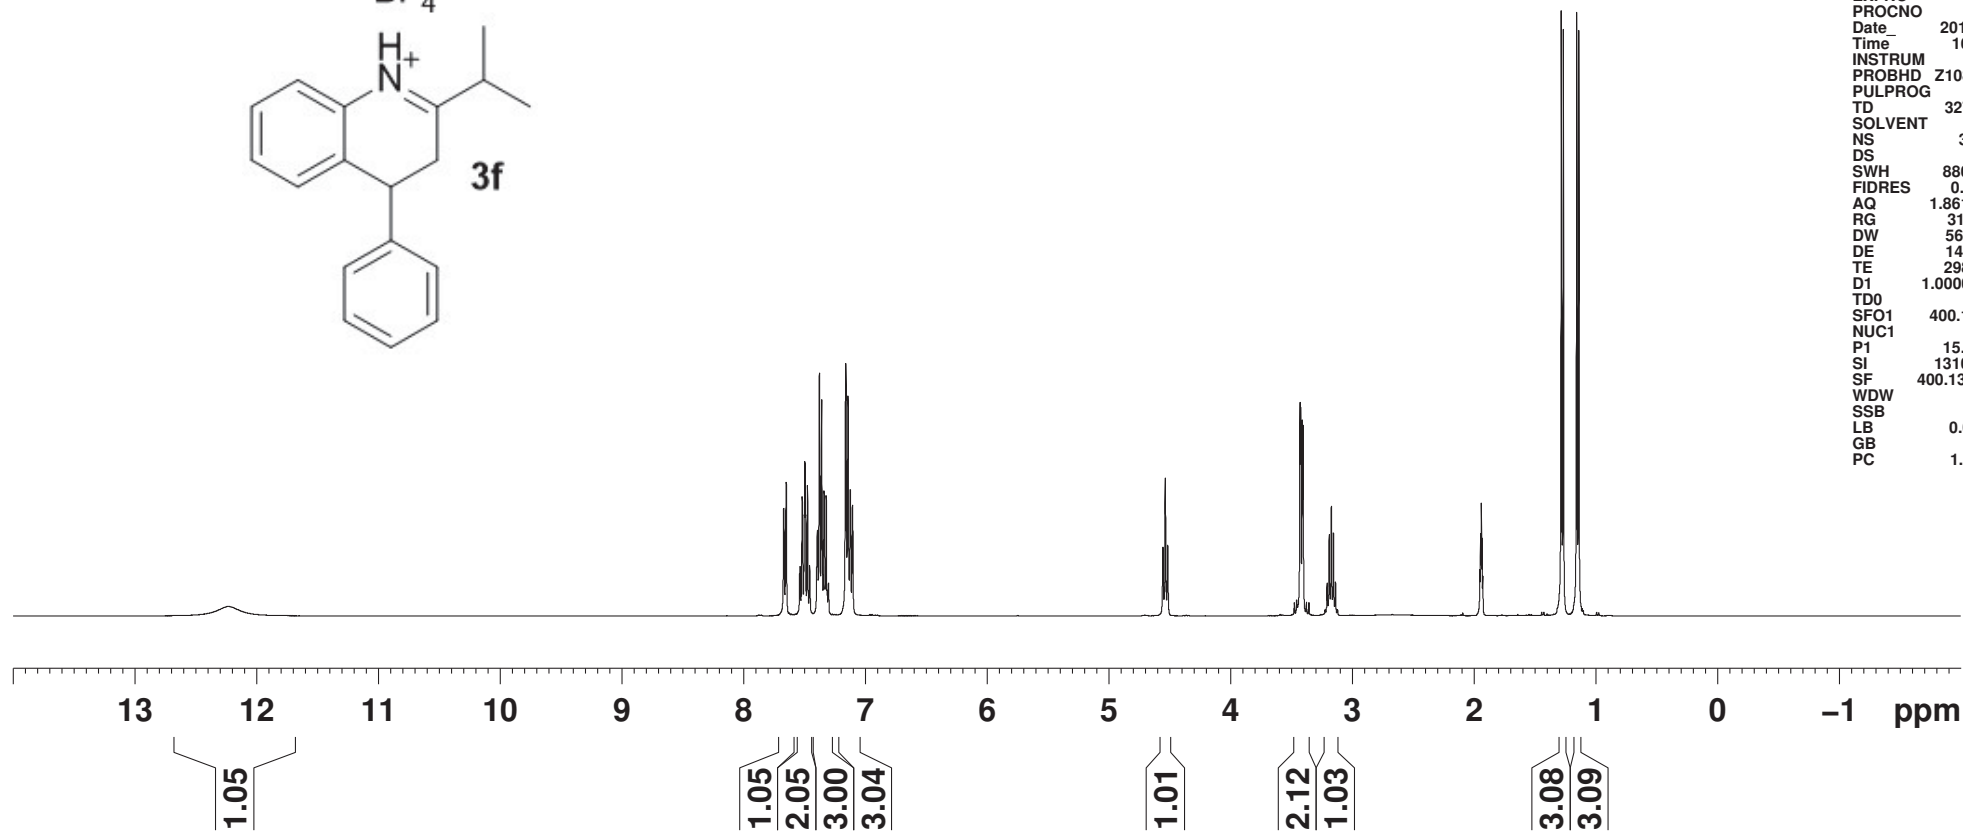

Phdiazonium salt, styrene, Dry tBuCN, 80deg, 2h, yellow solid

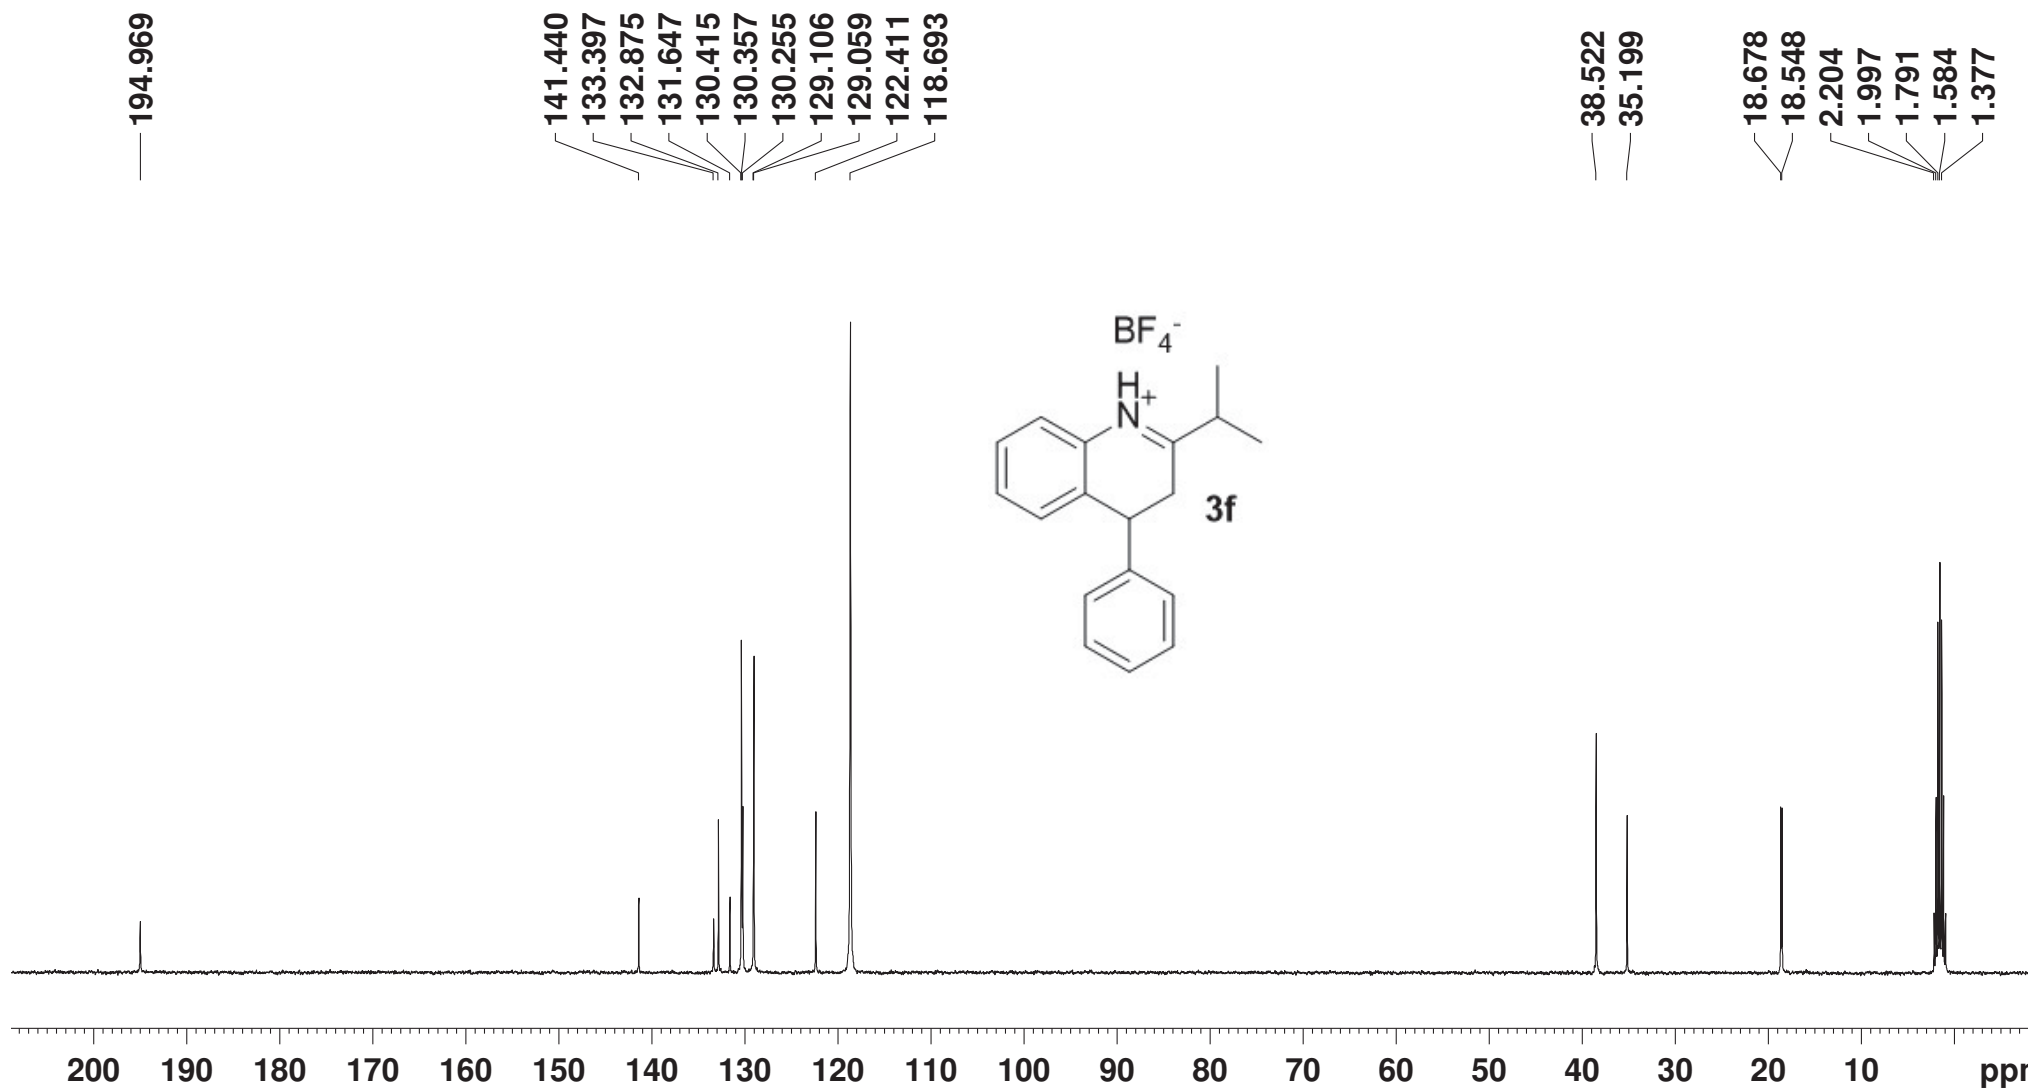

Phdiazol, Sty, Dry CypCN, 80deg, 2h, ether washed bright yellow solid

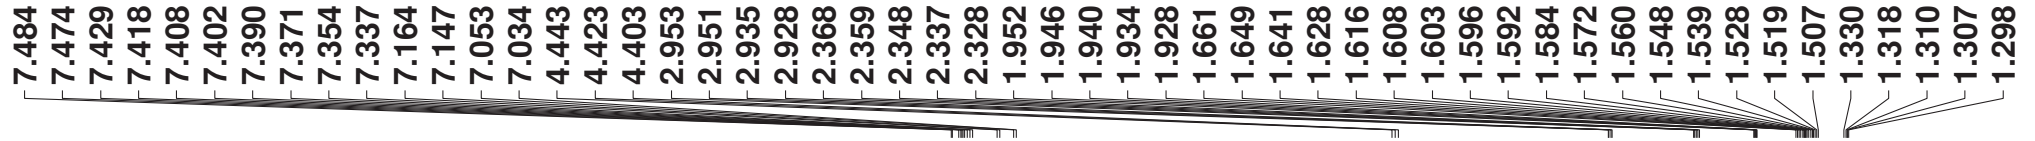

NAME mani 22-08-2018  
EXPNO 2  
PROCNO 1  
Date 20180822  
Time 14.47  
INSTRUM spect  
PROBHD 5 mm PABBO BB-  
PULPROG zg30  
TD 32768  
SOLVENT CD3CN  
NS 37  
DS 0  
SWH 8223.685 Hz  
FIDRES 0.250967 Hz  
AQ 1.9923444 sec  
RG 144  
DW 60.800 usec  
DE 6.50 usec  
TE 299.2 K  
D1 1.00000000 sec  
TD0 1

----- CHANNEL f1 -----  
NUC1 1H  
P1 14.50 usec  
PL1 0.00 dB  
PL1W 10.67551708 W  
SFO1 400.1528010 MHz  
SI 32768  
SF 400.1500106 MHz  
WDW EM  
SSB 0  
LB 0.30 Hz  
GB 0  
PC 1.00

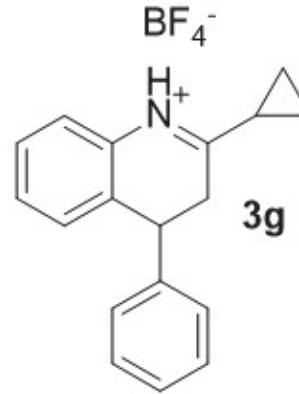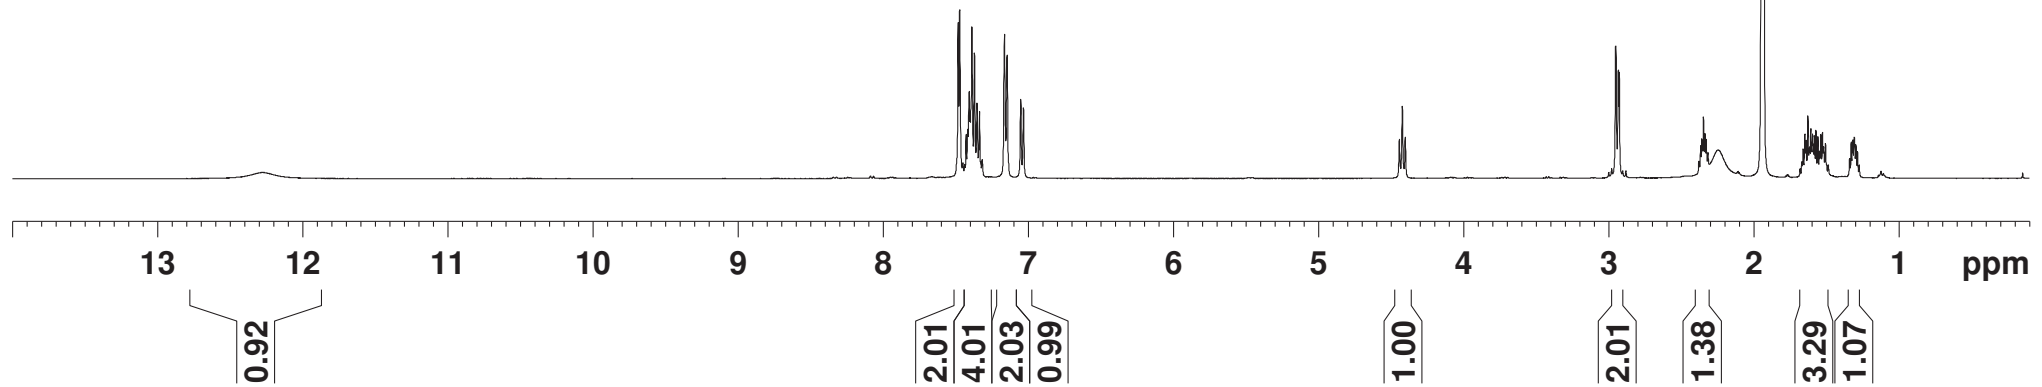

Phdiazonium salt, dry cyclopropyl nitrile styrene, 80deg, 2h, bright yellow solid

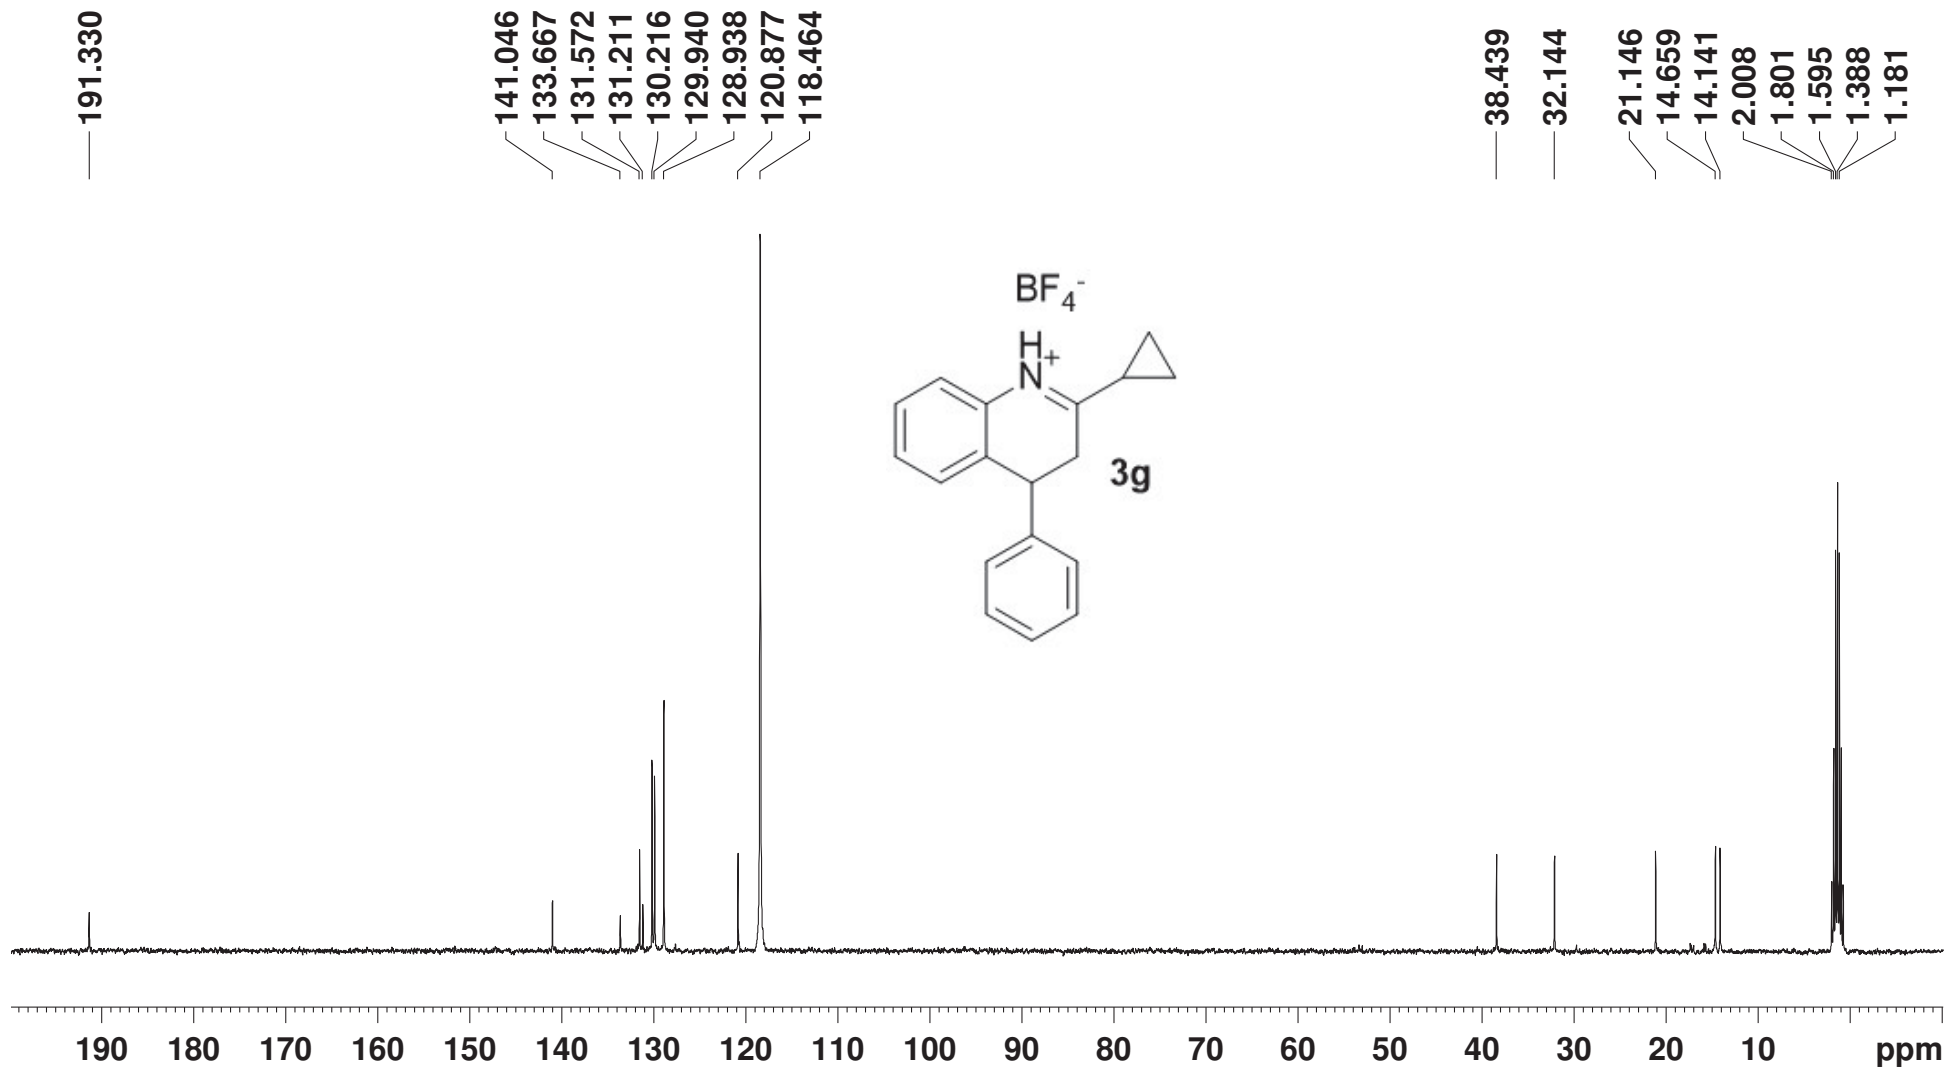

Phdiazonium salt, styrene, Dry PhCN, 80deg, 2h, orange solid

8.109  
8.106  
8.092  
8.088  
8.085  
7.889  
7.870  
7.792  
7.788  
7.772  
7.769  
7.741  
7.736  
7.722  
7.720  
7.705  
7.701  
7.551  
7.547  
7.532  
7.528  
7.519  
7.516  
7.500  
7.497  
7.424  
7.407  
7.402  
7.391  
7.388  
7.366  
7.363  
7.359  
7.345  
7.288  
7.284  
7.279  
7.267  
7.138  
7.119  
4.695  
4.674  
4.652  
3.924  
3.905  
3.881  
1.952  
1.946  
1.940  
1.934  
1.928

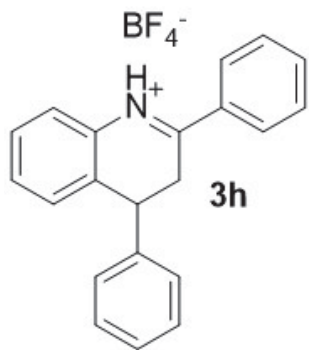

NAME mani 18-09-2017  
EXPNO 1  
PROCNO 1  
Date\_ 20170918  
Time 17.39 h  
INSTRUM spect  
PROBHD Z108618\_0411 (  
PULPROG zg30  
TD 32768  
SOLVENT CD3CN  
NS 30  
DS 0  
SWH 8802.817 Hz  
FIDRES 0.537281 Hz  
AQ 1.8612725 sec  
RG 118.08  
DW 56.800 usec  
DE 14.47 usec  
TE 299.5 K  
D1 1.00000000 sec  
TD0 1  
SFO1 400.1328009 MH  
NUC1 1H  
P1 15.50 usec  
SI 131072  
SF 400.1300113 MHz  
WDW EM  
SSB 0  
LB 0.00 Hz  
GB 0  
PC 1.00

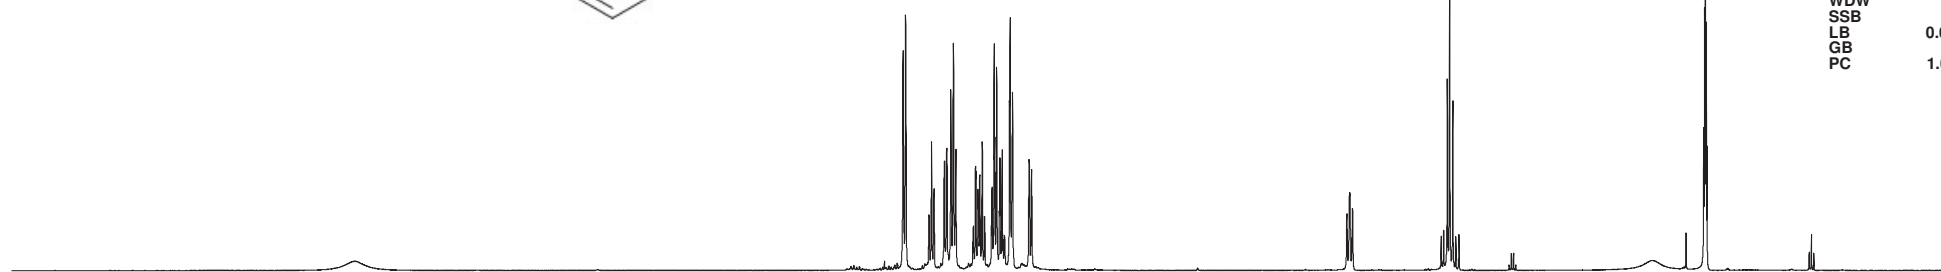

14 13 12 11 10 9 8 7 6 5 4 3 2 1 ppm

1.07  
2.04  
1.06  
1.07  
2.05  
2.12  
3.00  
2.00  
1.03  
1.03  
2.17



Phdiazonium salt, styrene, Dry PhCN, 80deg, 2h, orange solid

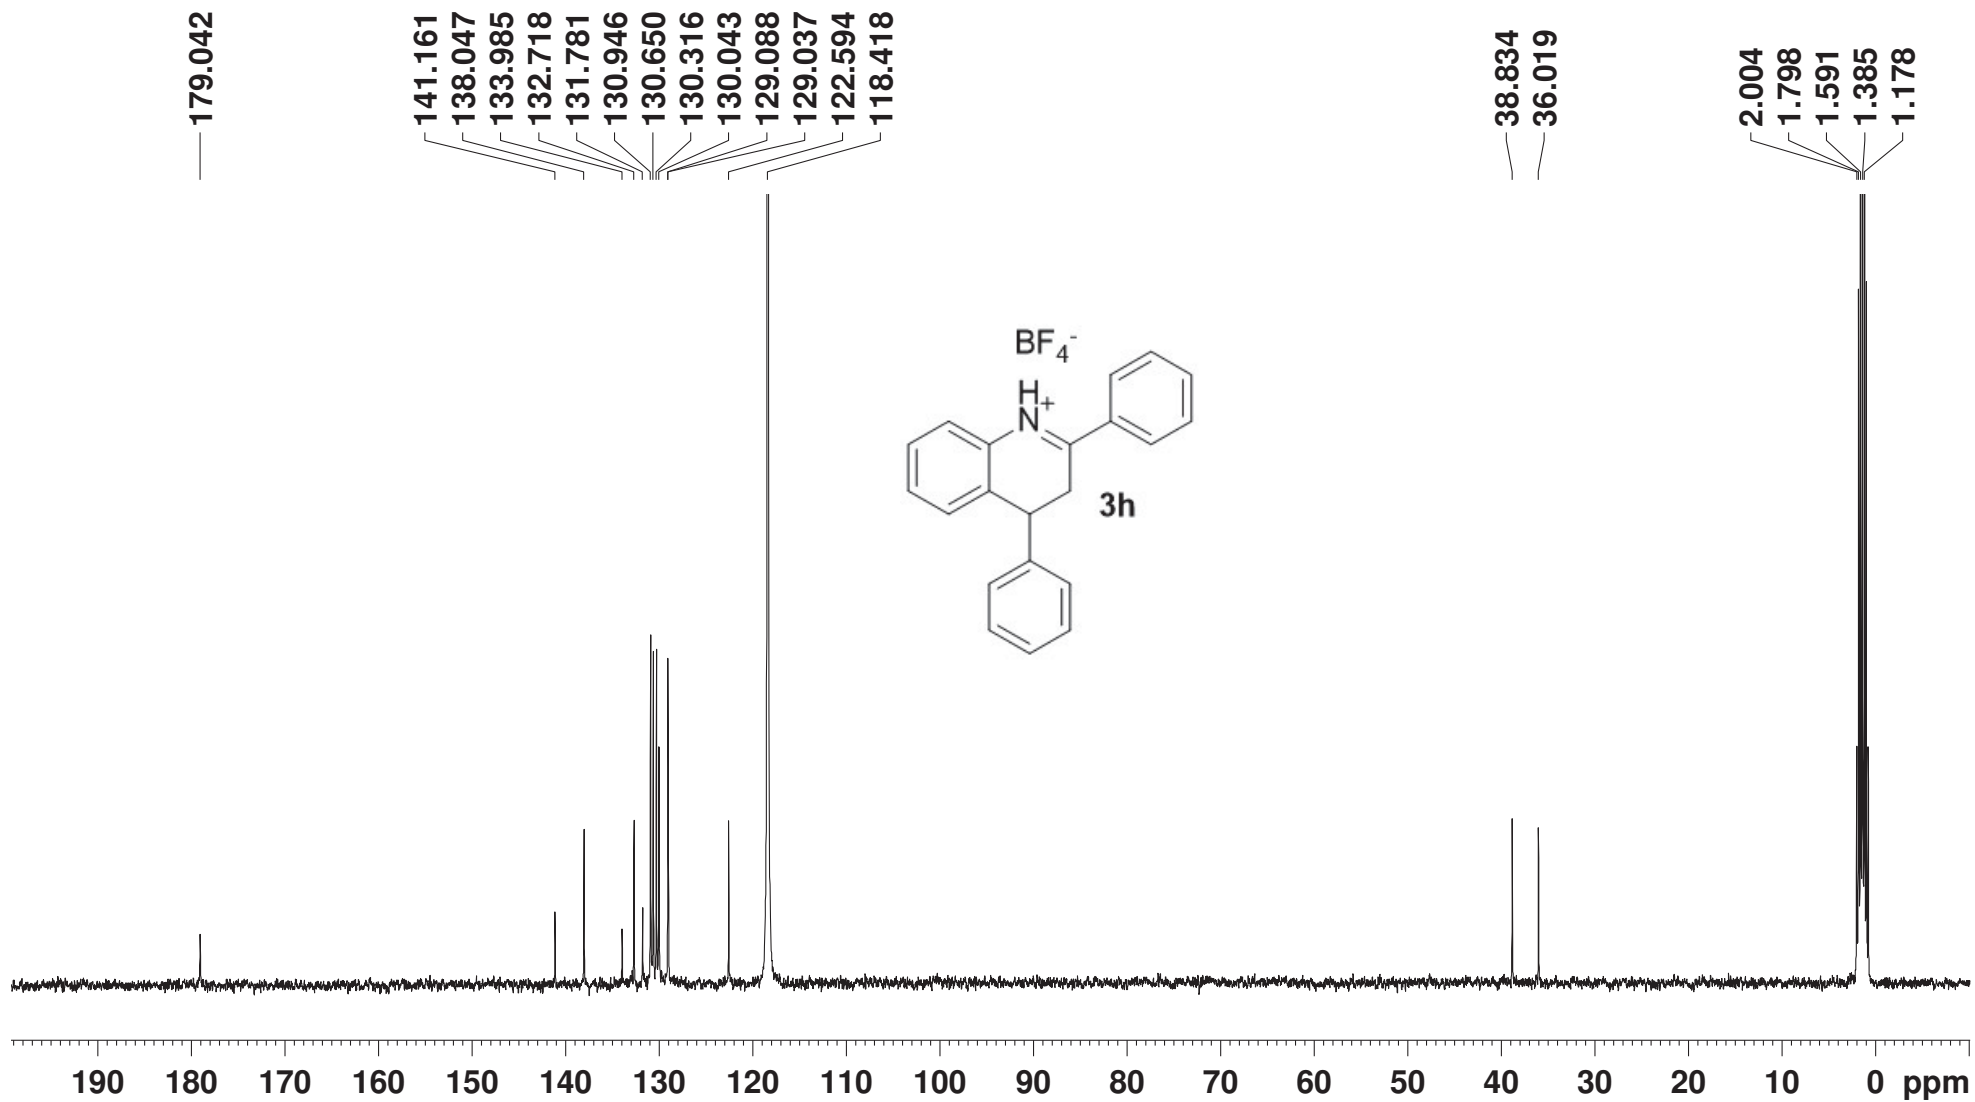

Benzenediazonium salt + 4-Bromostyrene with MeCN, 80deg 2hr

12.436  
7.553  
7.548  
7.537  
7.532  
7.522  
7.507  
7.503  
7.497  
7.494  
7.478  
7.476  
7.475  
7.460  
7.456  
7.451  
7.437  
7.433  
7.419  
7.415  
7.155  
7.149  
7.144  
7.133  
7.128  
7.030  
7.014  
7.011  
4.520  
4.498  
4.475  
3.472  
3.453  
3.424  
3.404  
3.364  
3.339  
3.315  
3.290  
2.652  
1.952  
1.946  
1.940  
1.934  
1.928

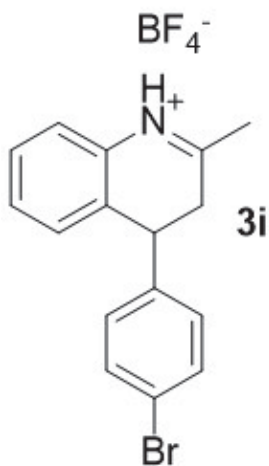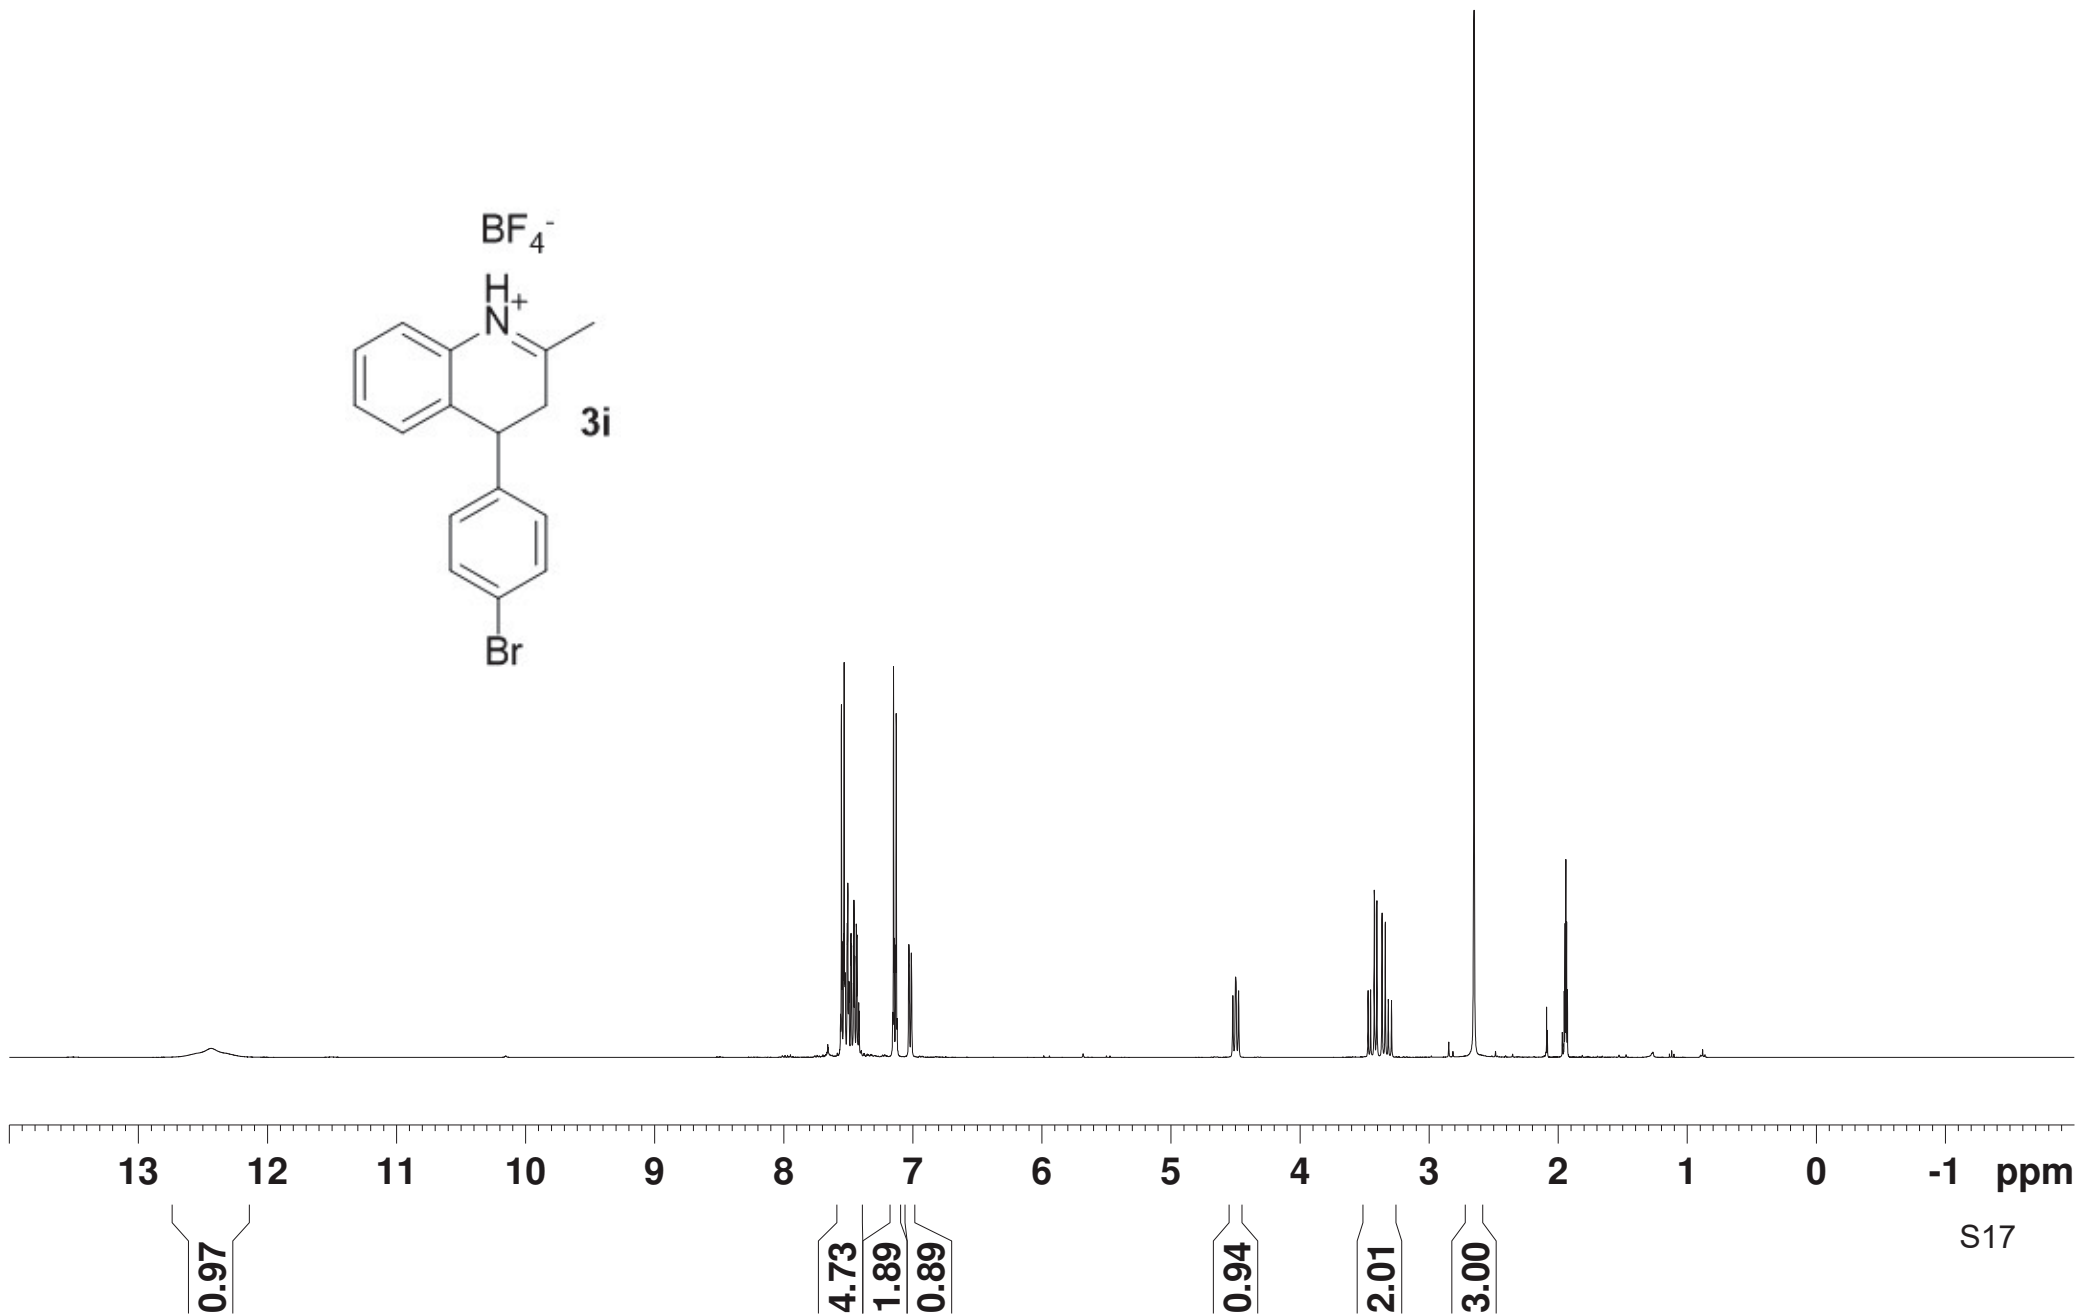

Benzenediazonium salt + 4-Bromostyrene with MeCN, 80deg 2hr

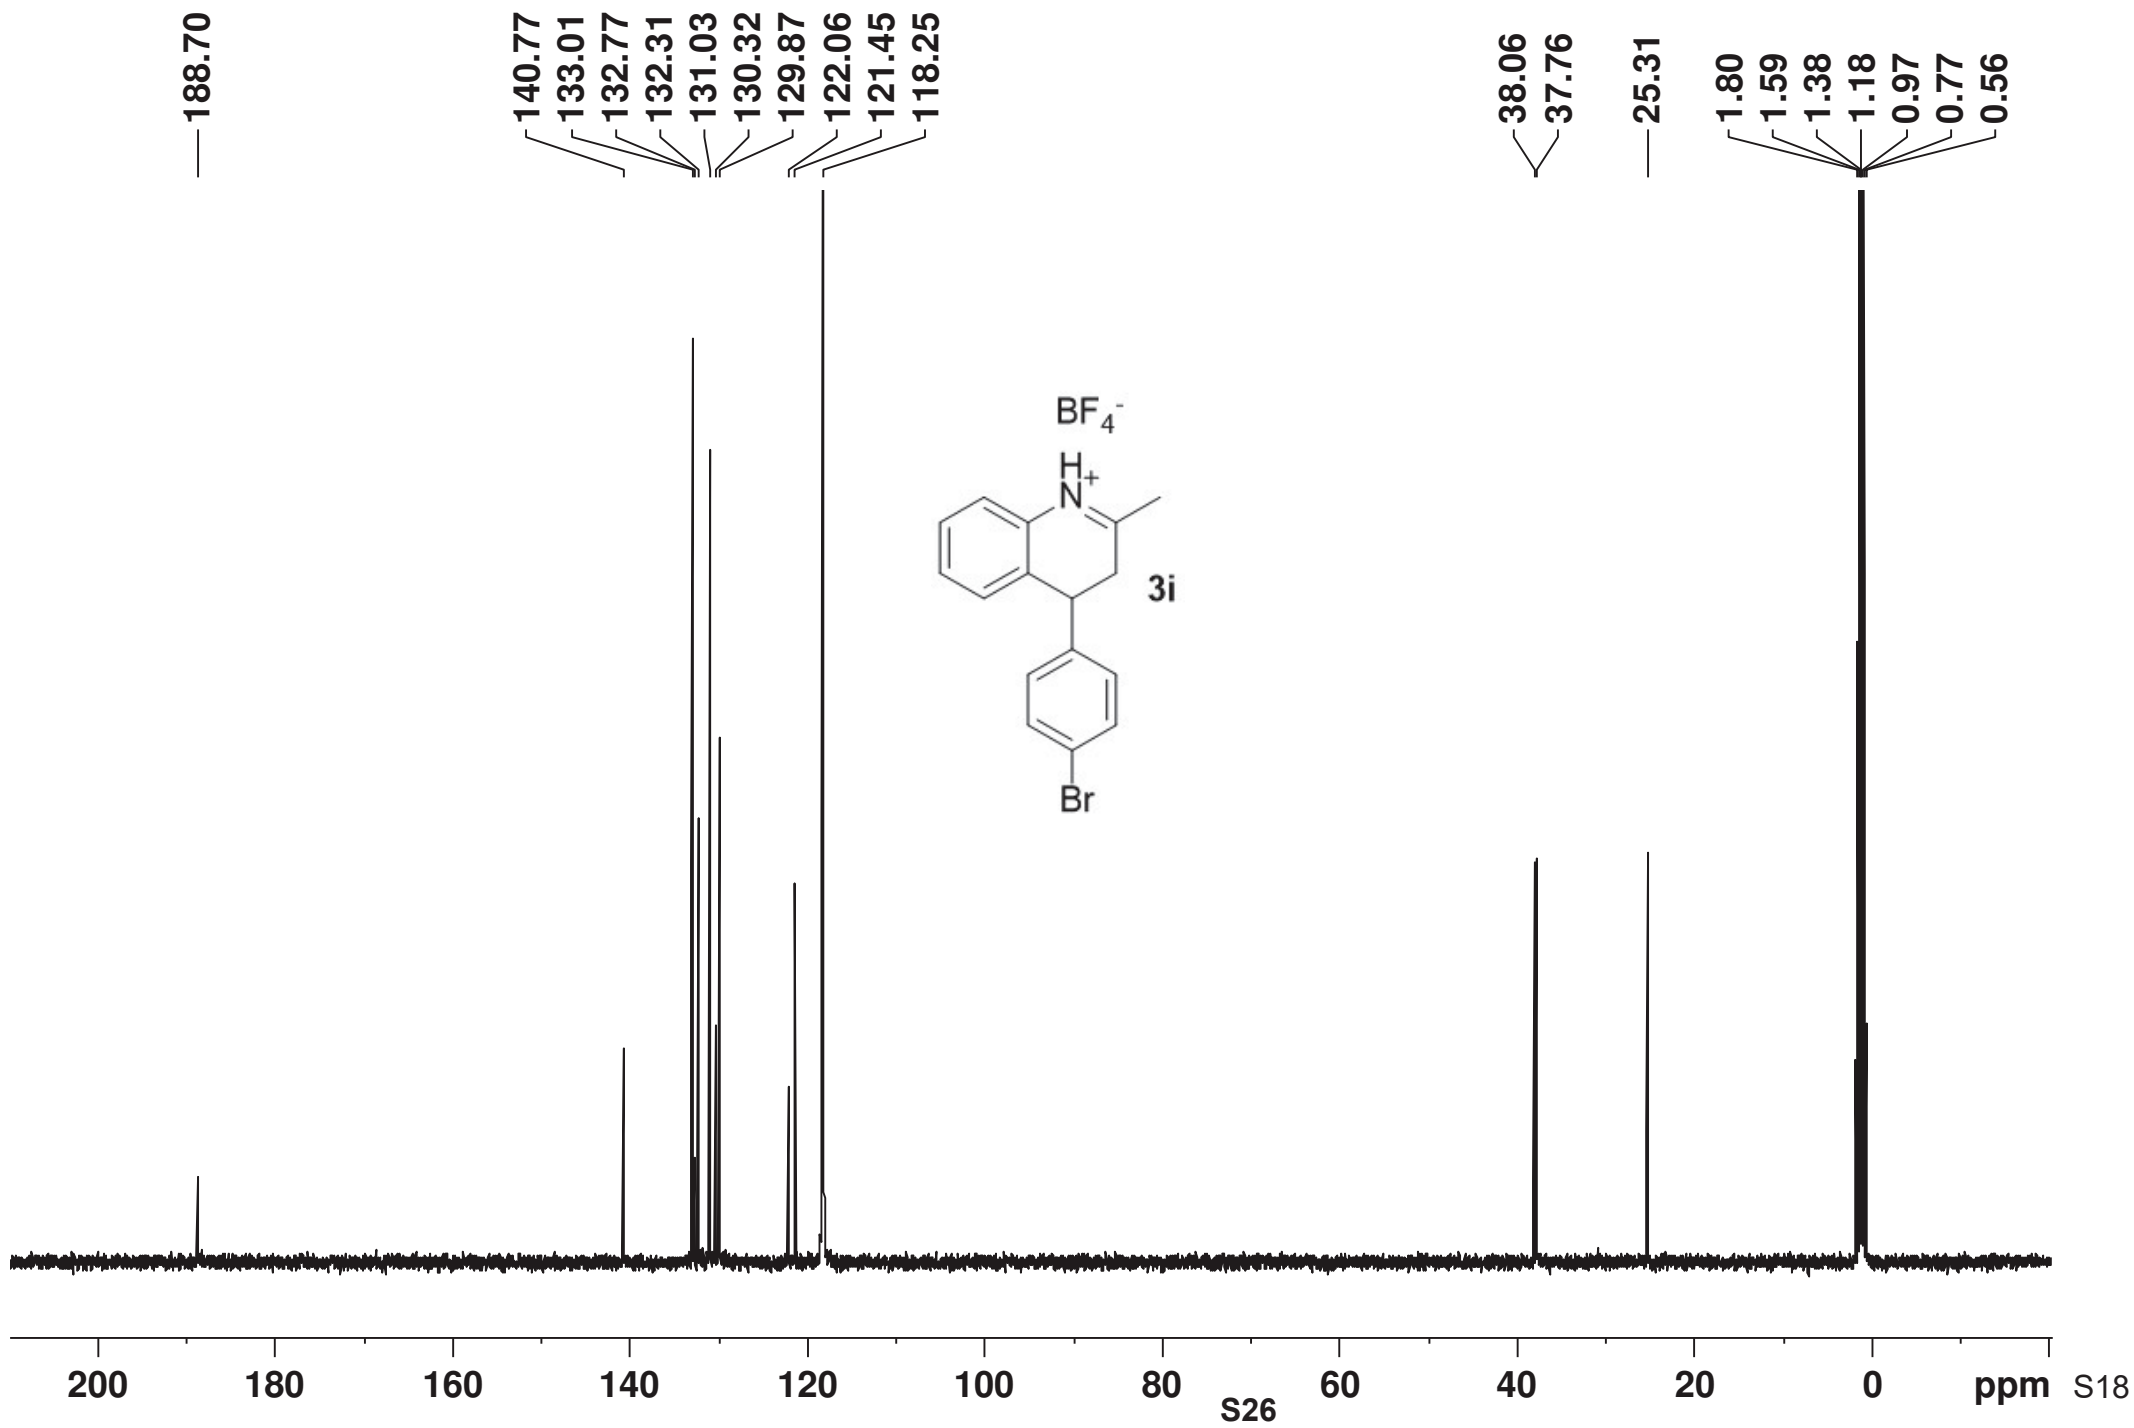

Benzenediazonium salt, 4-Chlorostyrene with MeCN, 80deg, 2 hours, white solid

7.505  
7.485  
7.464  
7.446  
7.427  
7.412  
7.396  
7.390  
7.215  
7.210  
7.194  
7.189  
7.042  
7.024  
4.534  
4.513  
4.491  
3.475  
3.469  
3.456  
3.450  
3.427  
3.421  
3.407  
3.402  
3.368  
3.363  
3.343  
3.338  
3.320  
3.314  
3.295  
3.290  
2.646  
1.952  
1.945  
1.939  
1.933  
1.927

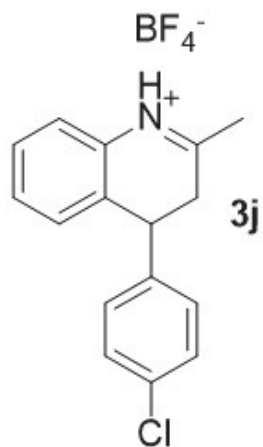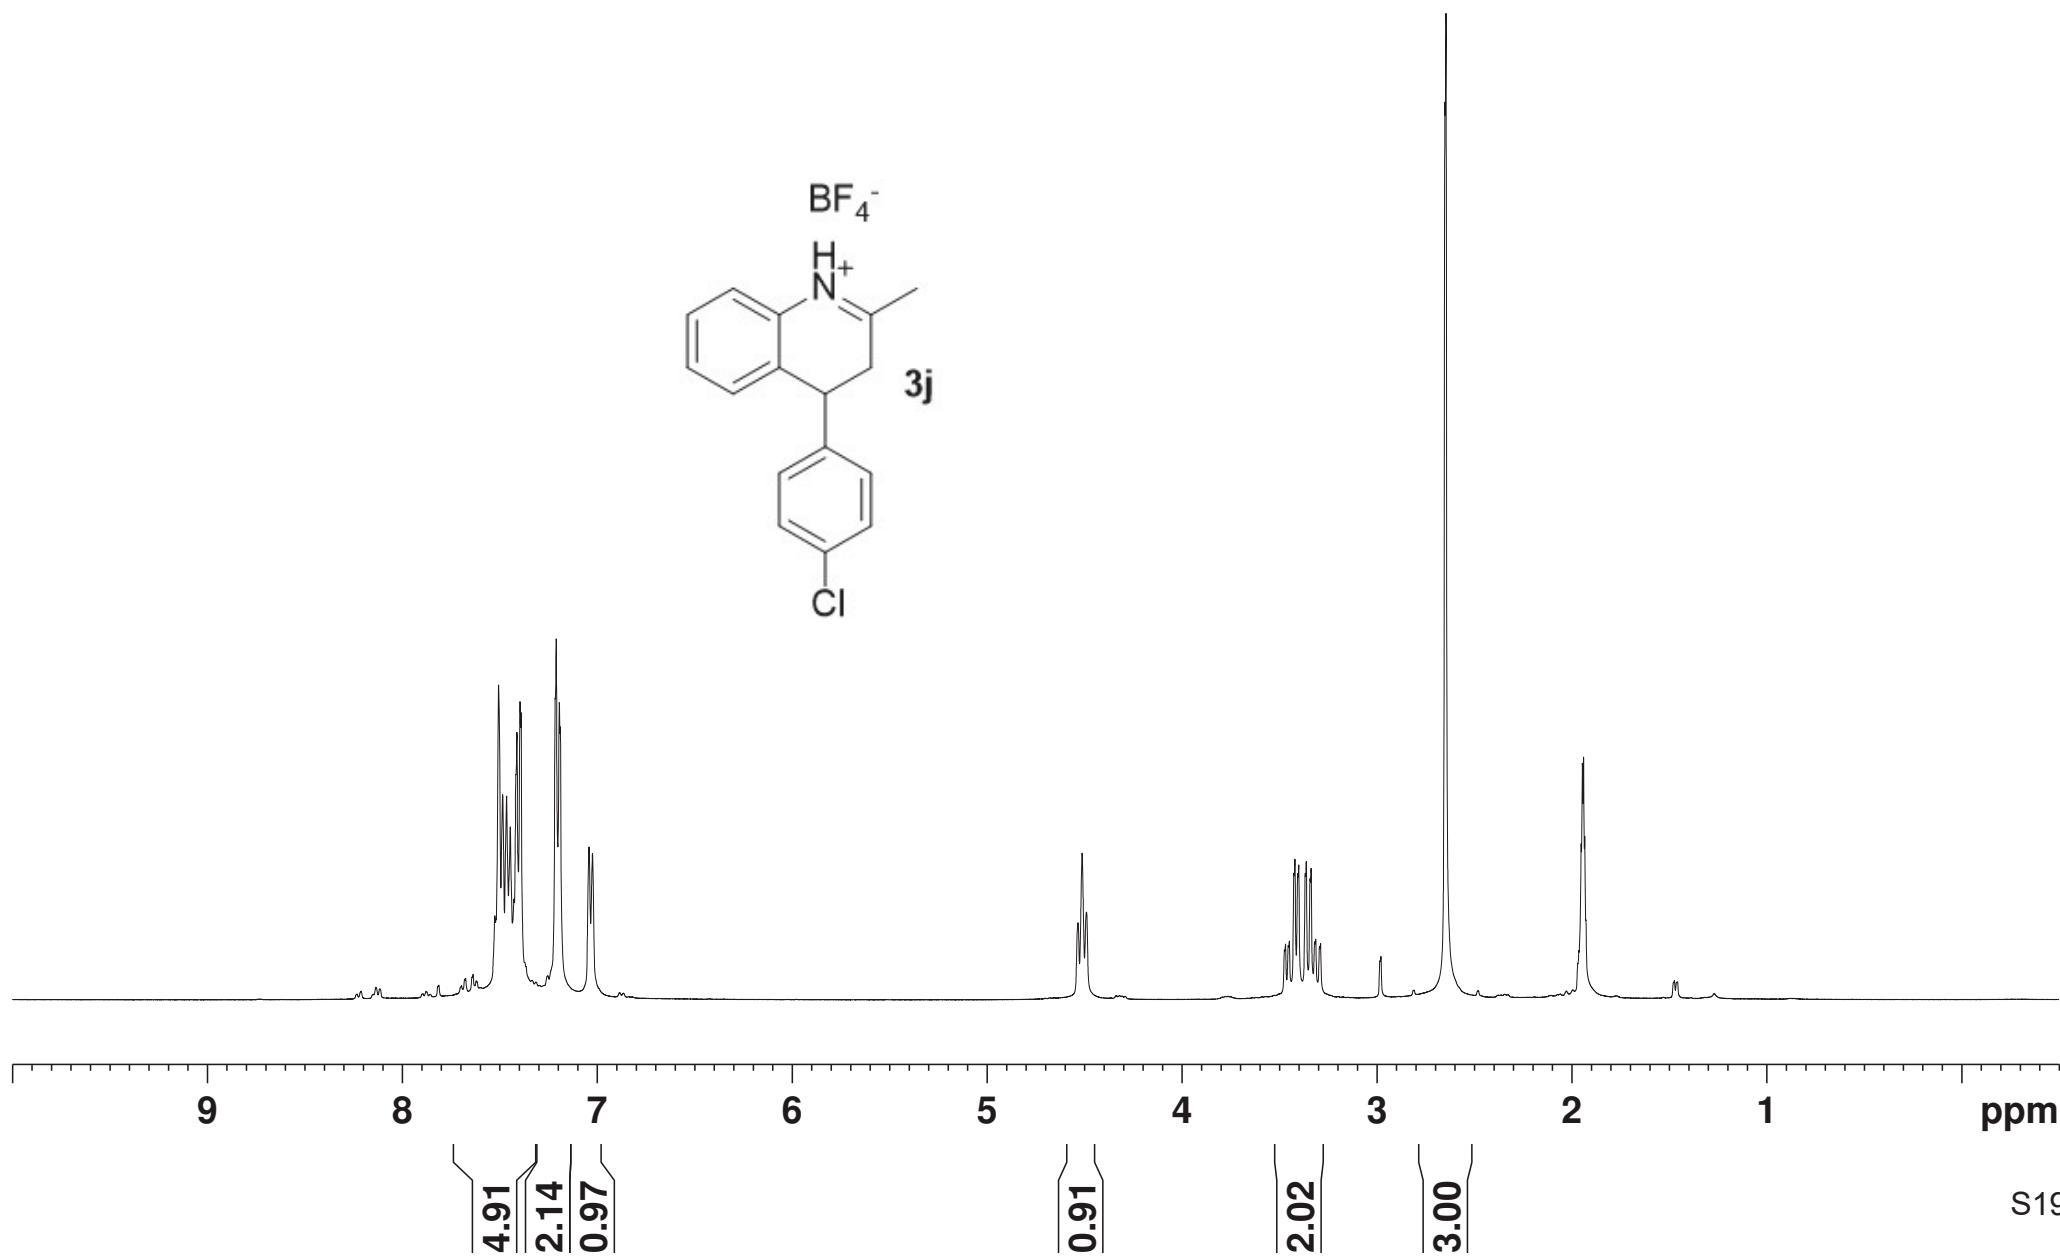

Benzenediazonium salt, 4-Chlorostyrene with MeCN, 80deg, 2 hours, white solid

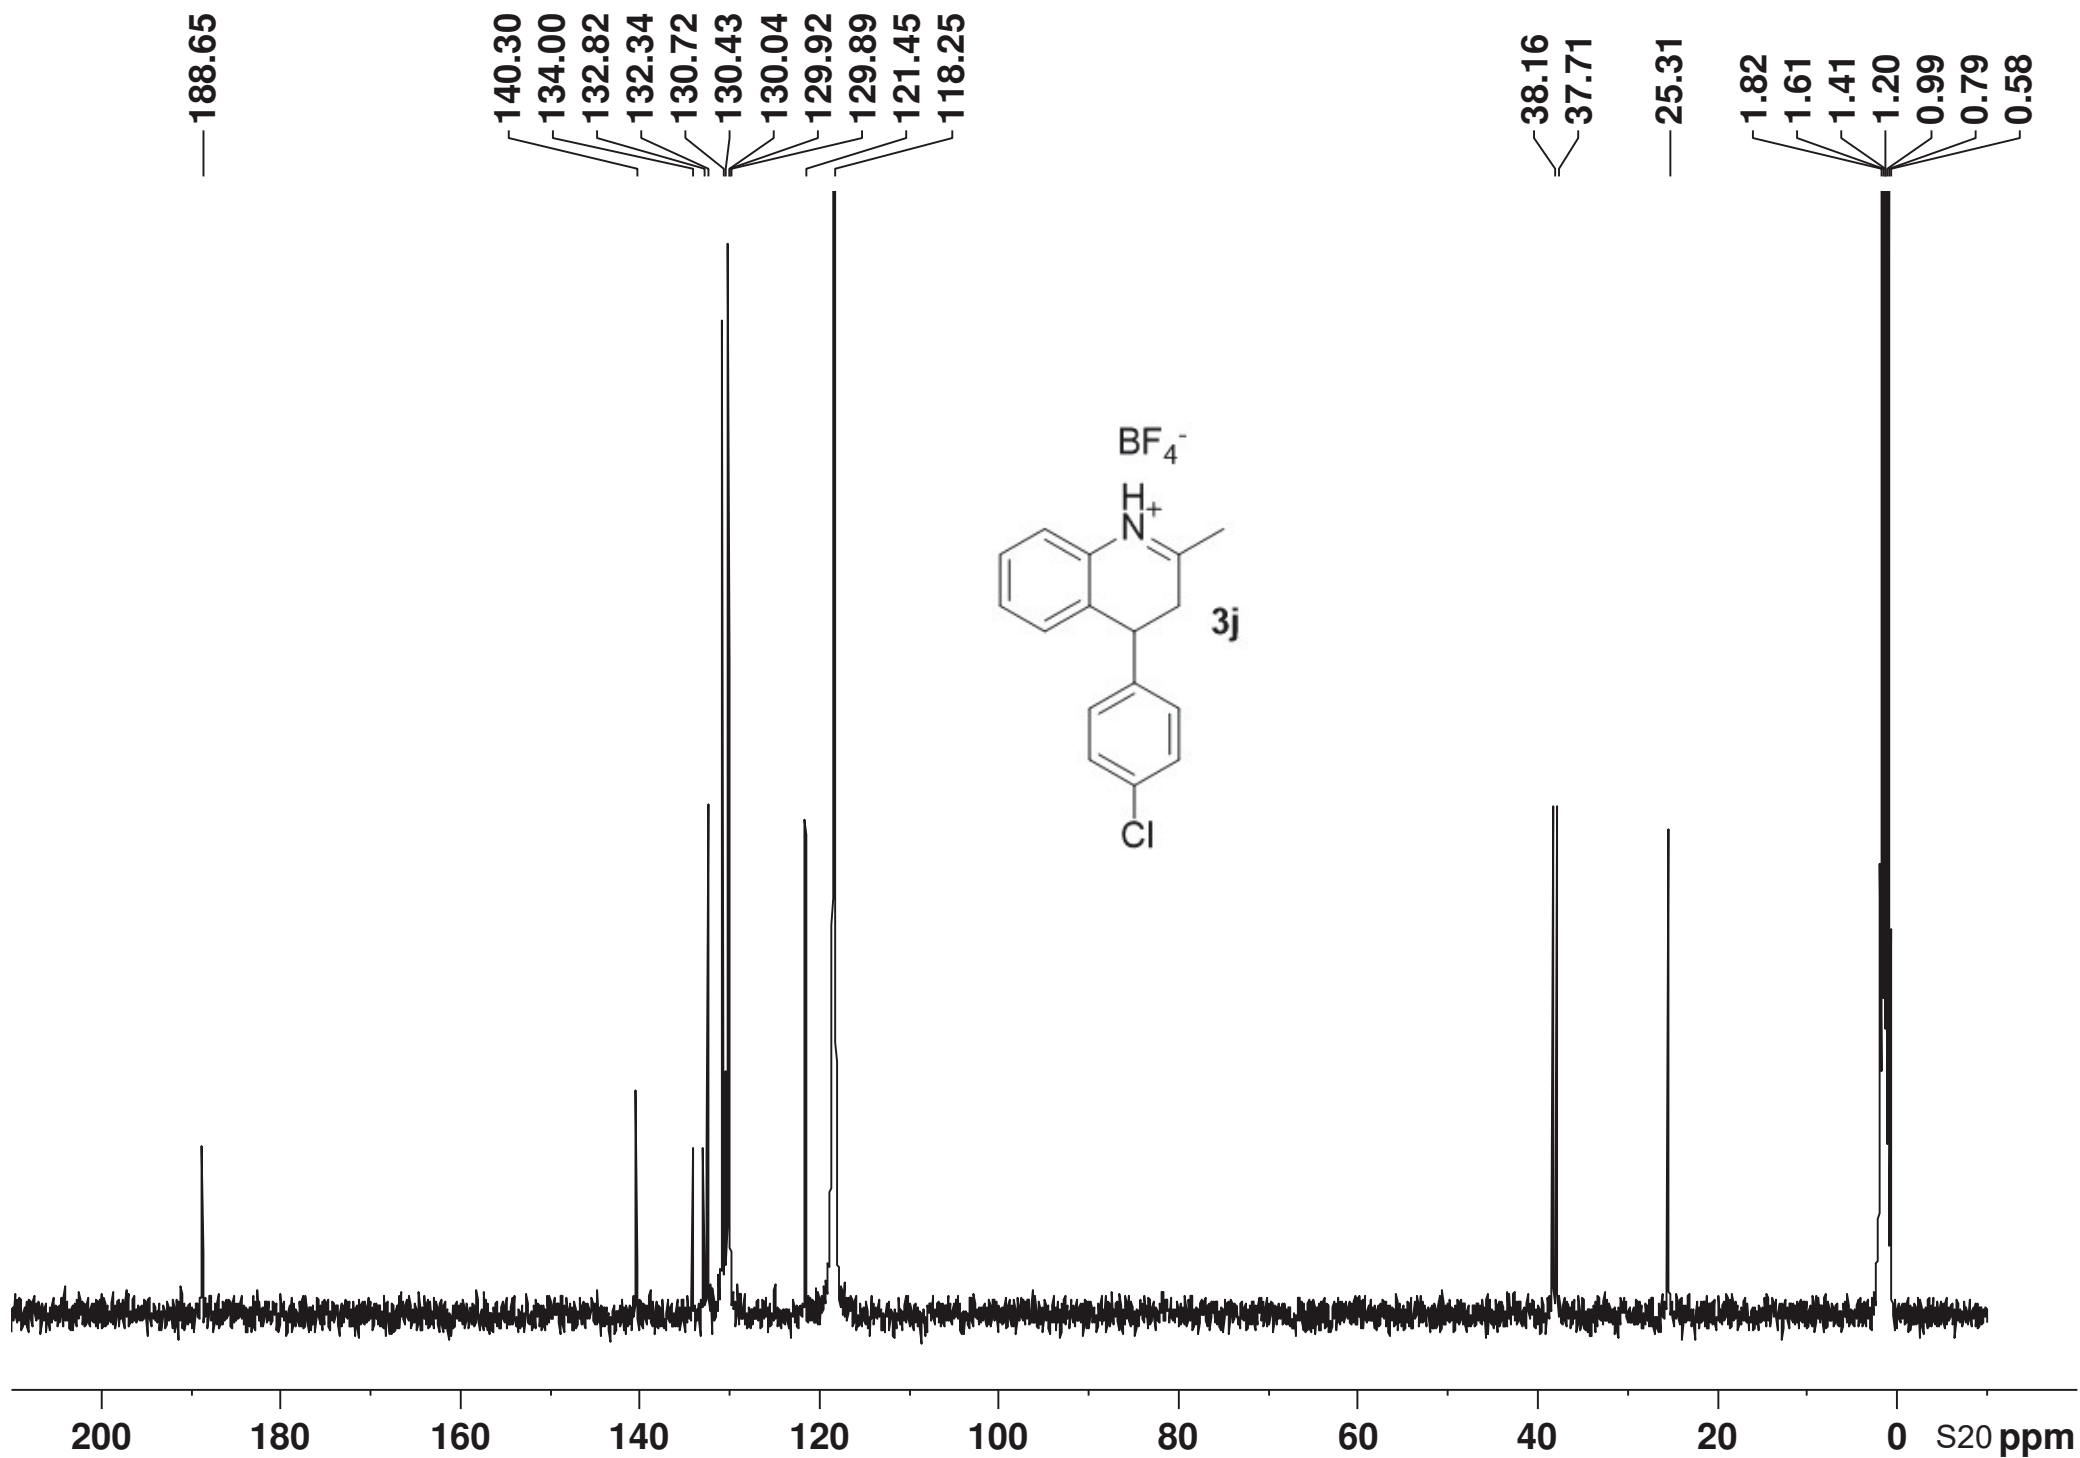

Benzenediazonium salt + 4-vinylbenzyl chloride with MeCN, 80deg 2hr

12.445

7.529 7.524 7.509 7.506 7.496 7.492 7.477 7.474 7.458 7.452 7.439 7.432 7.421 7.417 7.233 7.212 7.041 7.023 4.666 4.539 4.517 4.495 3.488 3.468 3.439 3.420 3.393 3.368 3.344 3.320 2.659 1.952 1.946 1.940 1.934 1.927

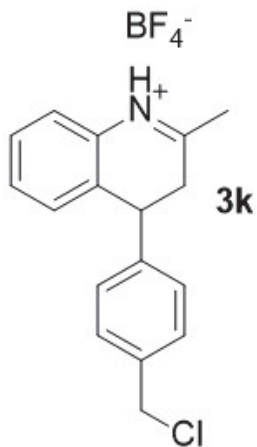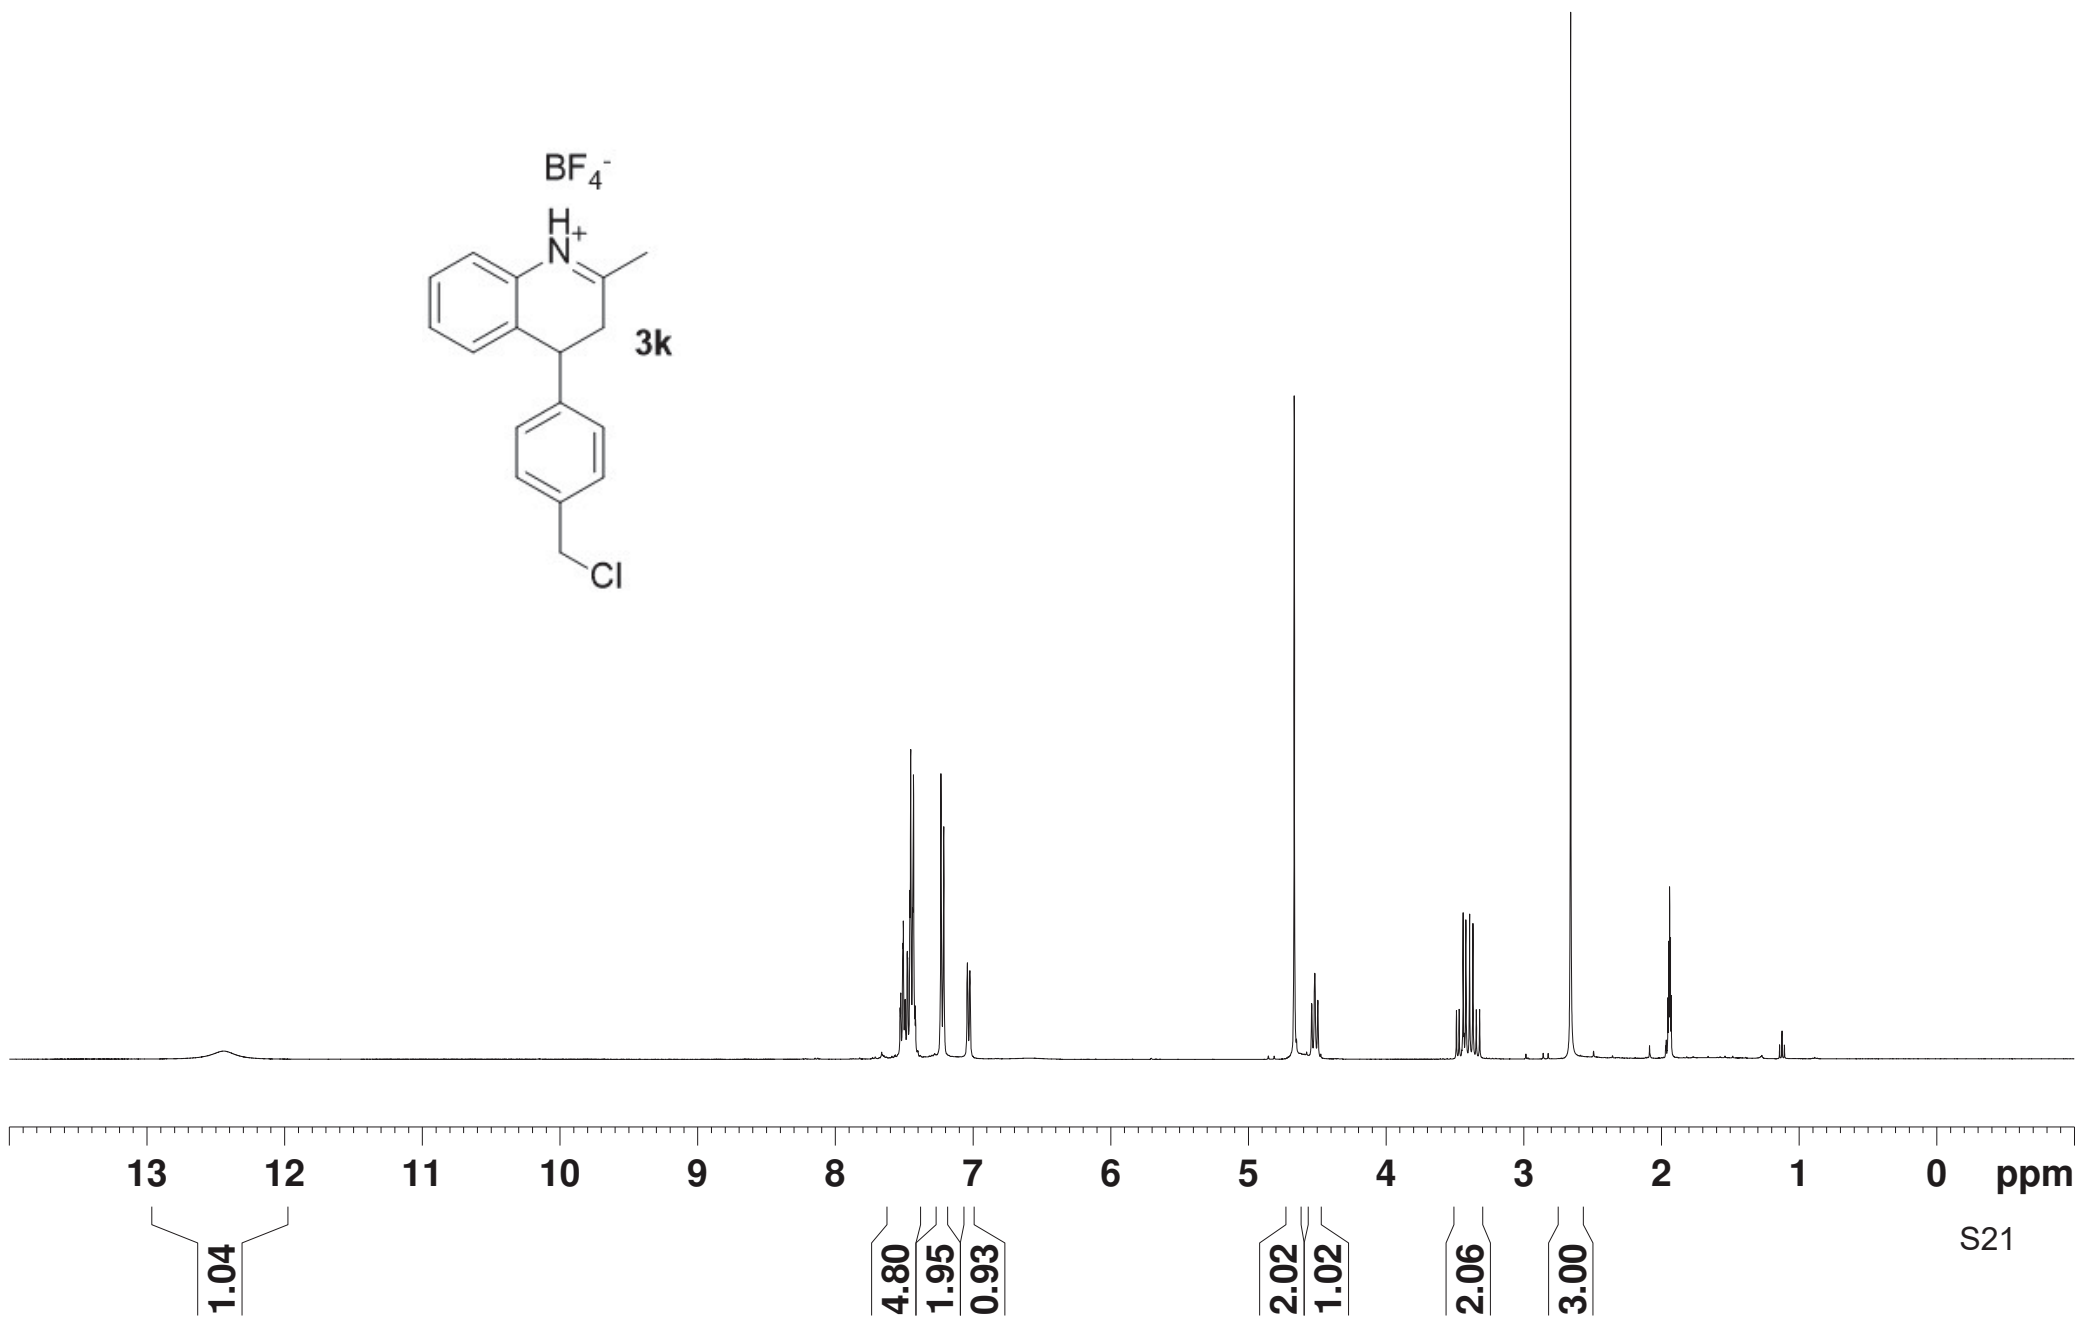

Benzenediazonium salt + 4-vinylbenzyl chloride with MeCN, 80deg 2hr

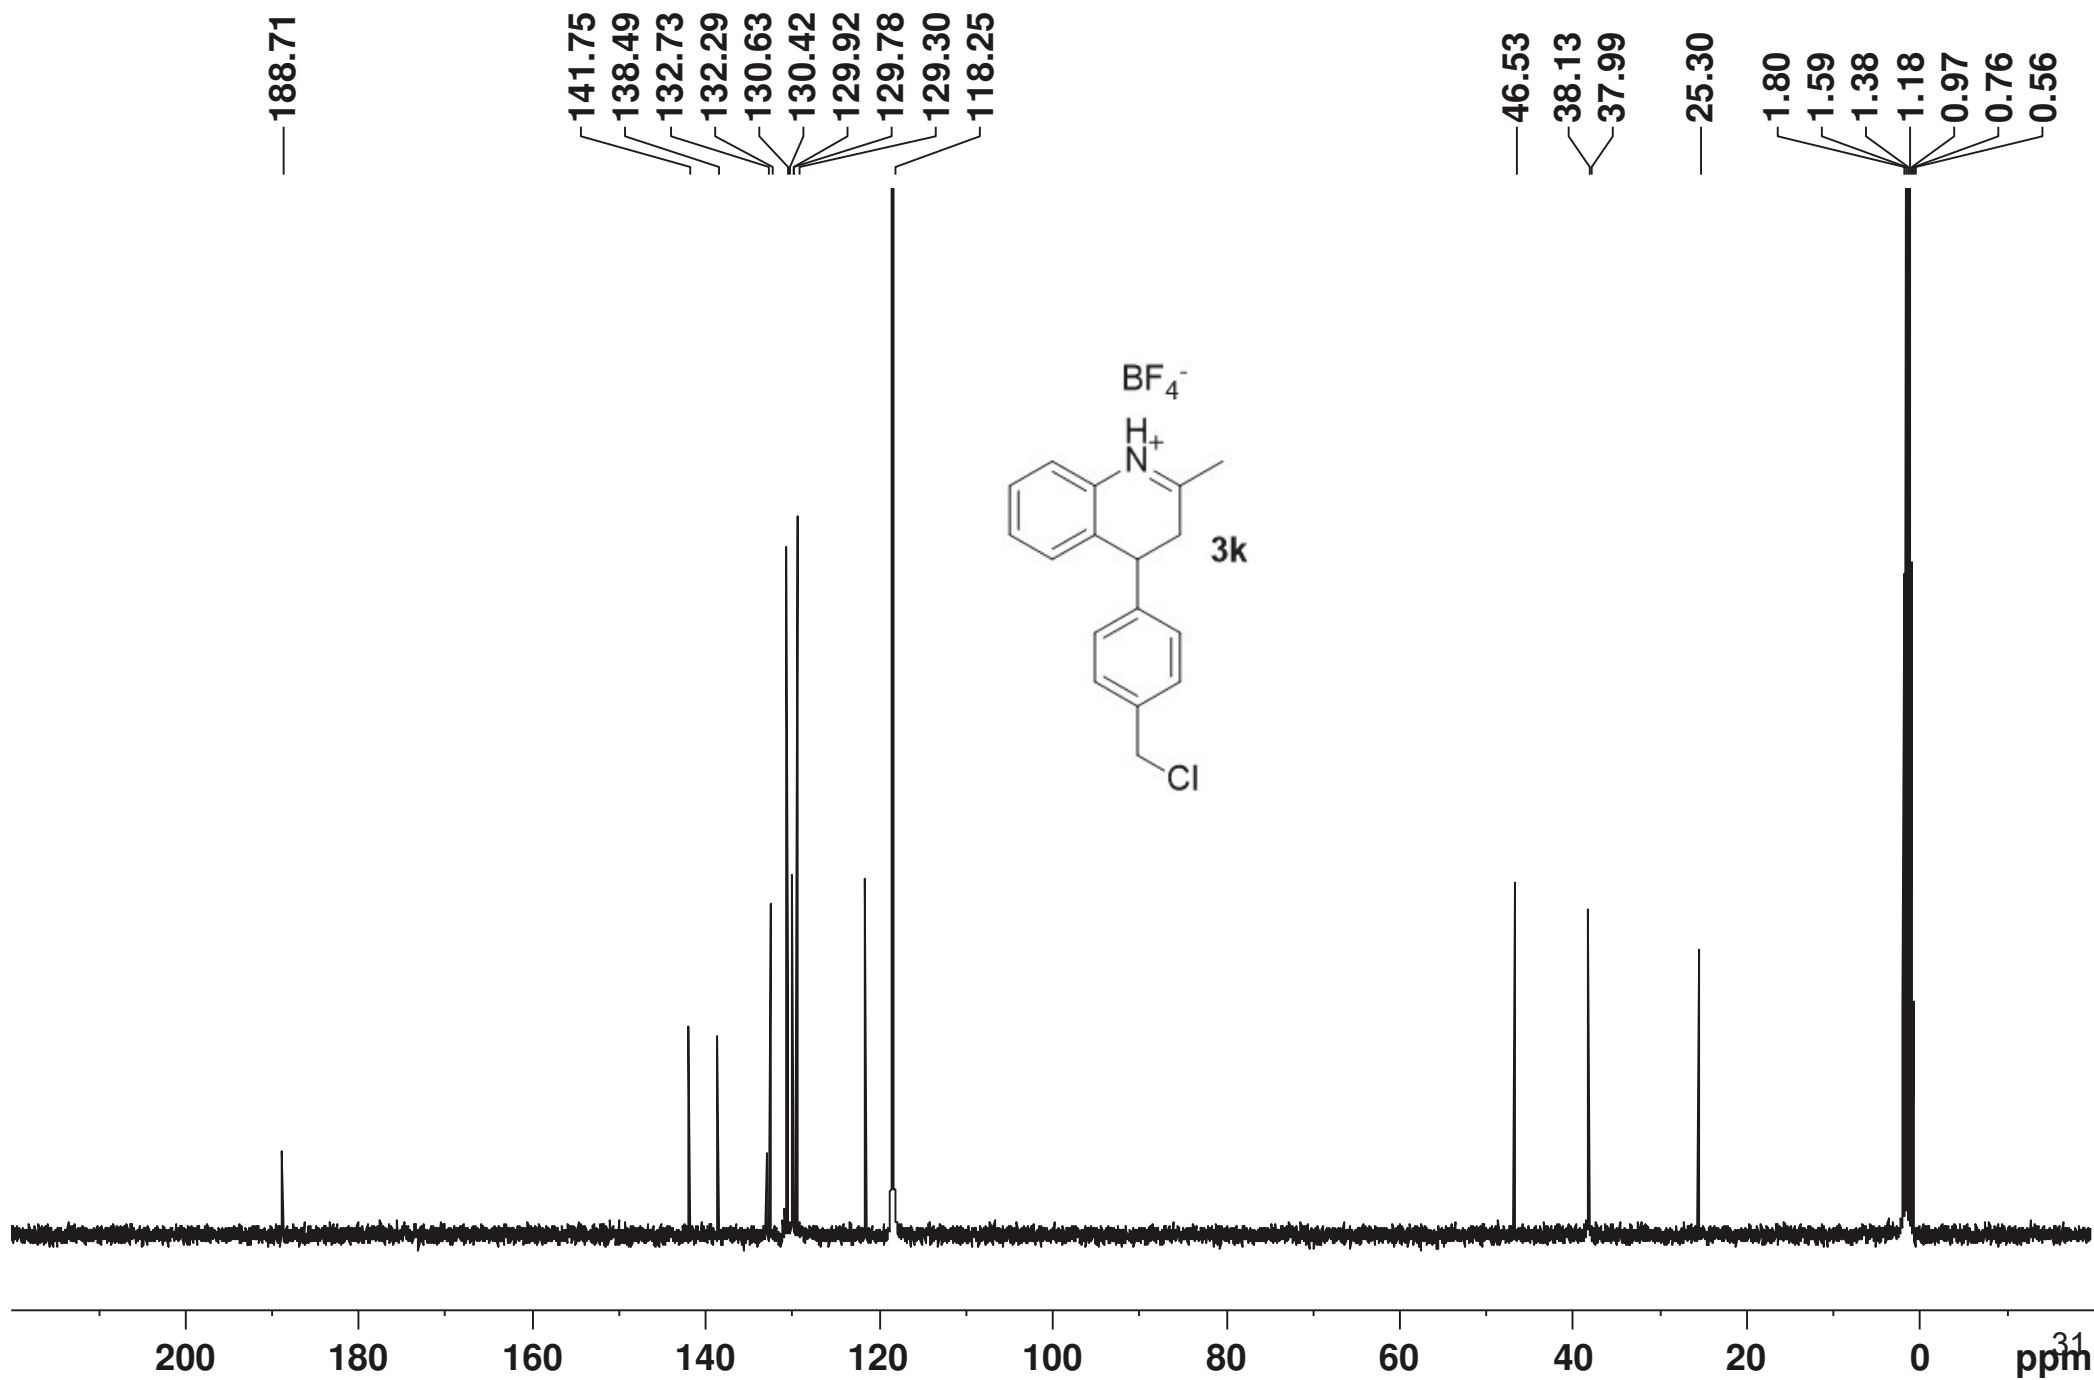

Benzenediazonium salt, 2,5-dimethylstyrene with Isopropyl nitrile, 80deg, 2 hours, white so

12.035  
7.644  
7.625  
7.526  
7.510  
7.507  
7.491  
7.488  
7.483  
7.479  
7.464  
7.460  
7.445  
7.442  
7.194  
7.174  
7.049  
7.029  
7.021  
7.002  
6.654  
4.740  
4.719  
4.698  
3.408  
3.389  
3.361  
3.342  
3.313  
3.290  
3.266  
3.243  
3.214  
3.197  
3.180  
3.163  
3.146  
3.129  
3.112  
2.365  
2.186  
1.952  
1.946  
1.940  
1.934  
1.928  
1.286  
1.269  
1.179  
1.162

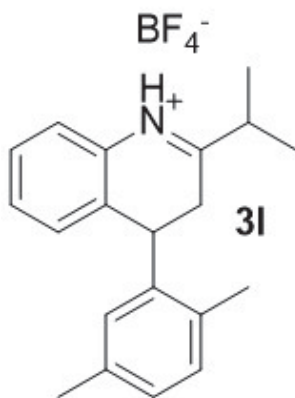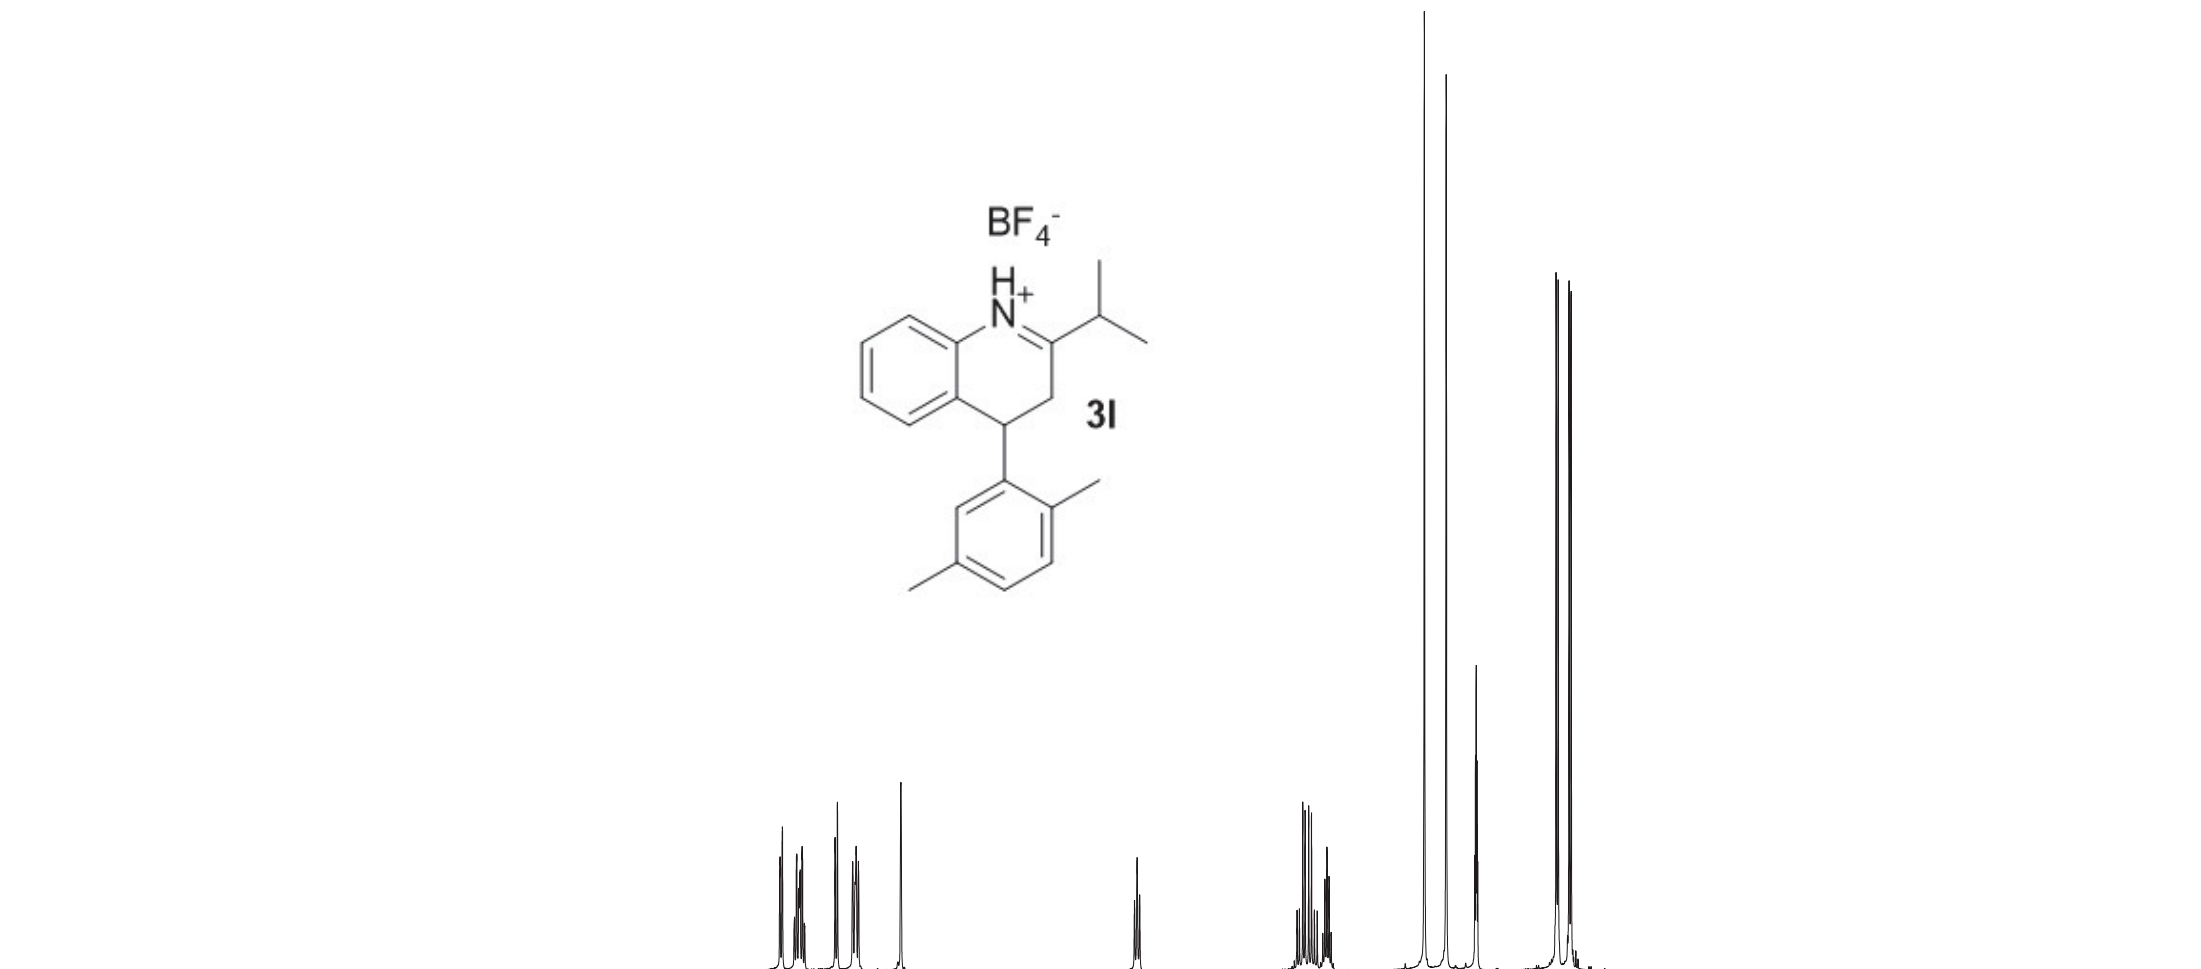

13 12 11 10 9 8 7 6 5 4 3 2 1 0 -1 -2 -3 ppm

0.51

0.92

1.83

0.88

1.75

0.81

0.94

2.09

0.99

2.98

2.86

3.08

3.01



Benzenediazonium salt, 2,5-dimethylstyrene with Isopropyl nitrile, 80deg, 2 hours, white solid

— 194.75

138.60  
137.26  
134.10  
133.38  
132.54  
131.90  
131.61  
129.68  
129.25  
128.45  
121.98  
118.26

38.24  
34.28  
33.67  
20.88  
19.11  
18.45  
18.02  
1.83  
1.63  
1.42  
1.22  
1.01  
0.80  
0.60

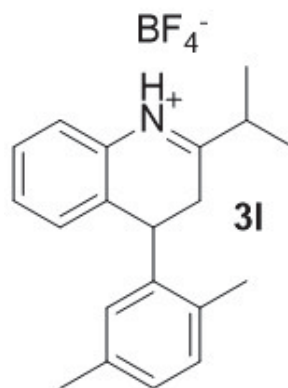

200 180 160 140 120 100 80 60 40 20 0 S24 ppm

Benzenediazonium salt, alpha-methylstyrene, 80deg, 2 hours, white solid

7.551  
7.541  
7.533  
7.521  
7.518  
7.513  
7.506  
7.372  
7.355  
7.351  
7.336  
7.315  
7.312  
7.294  
7.213  
7.210  
7.204  
7.191

3.705  
3.658  
3.234  
3.187  
2.630  
1.952  
1.946  
1.940  
1.934  
1.928  
1.717

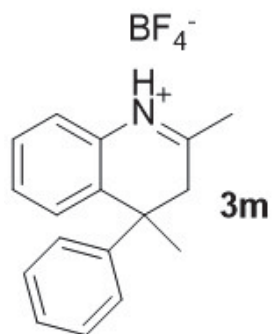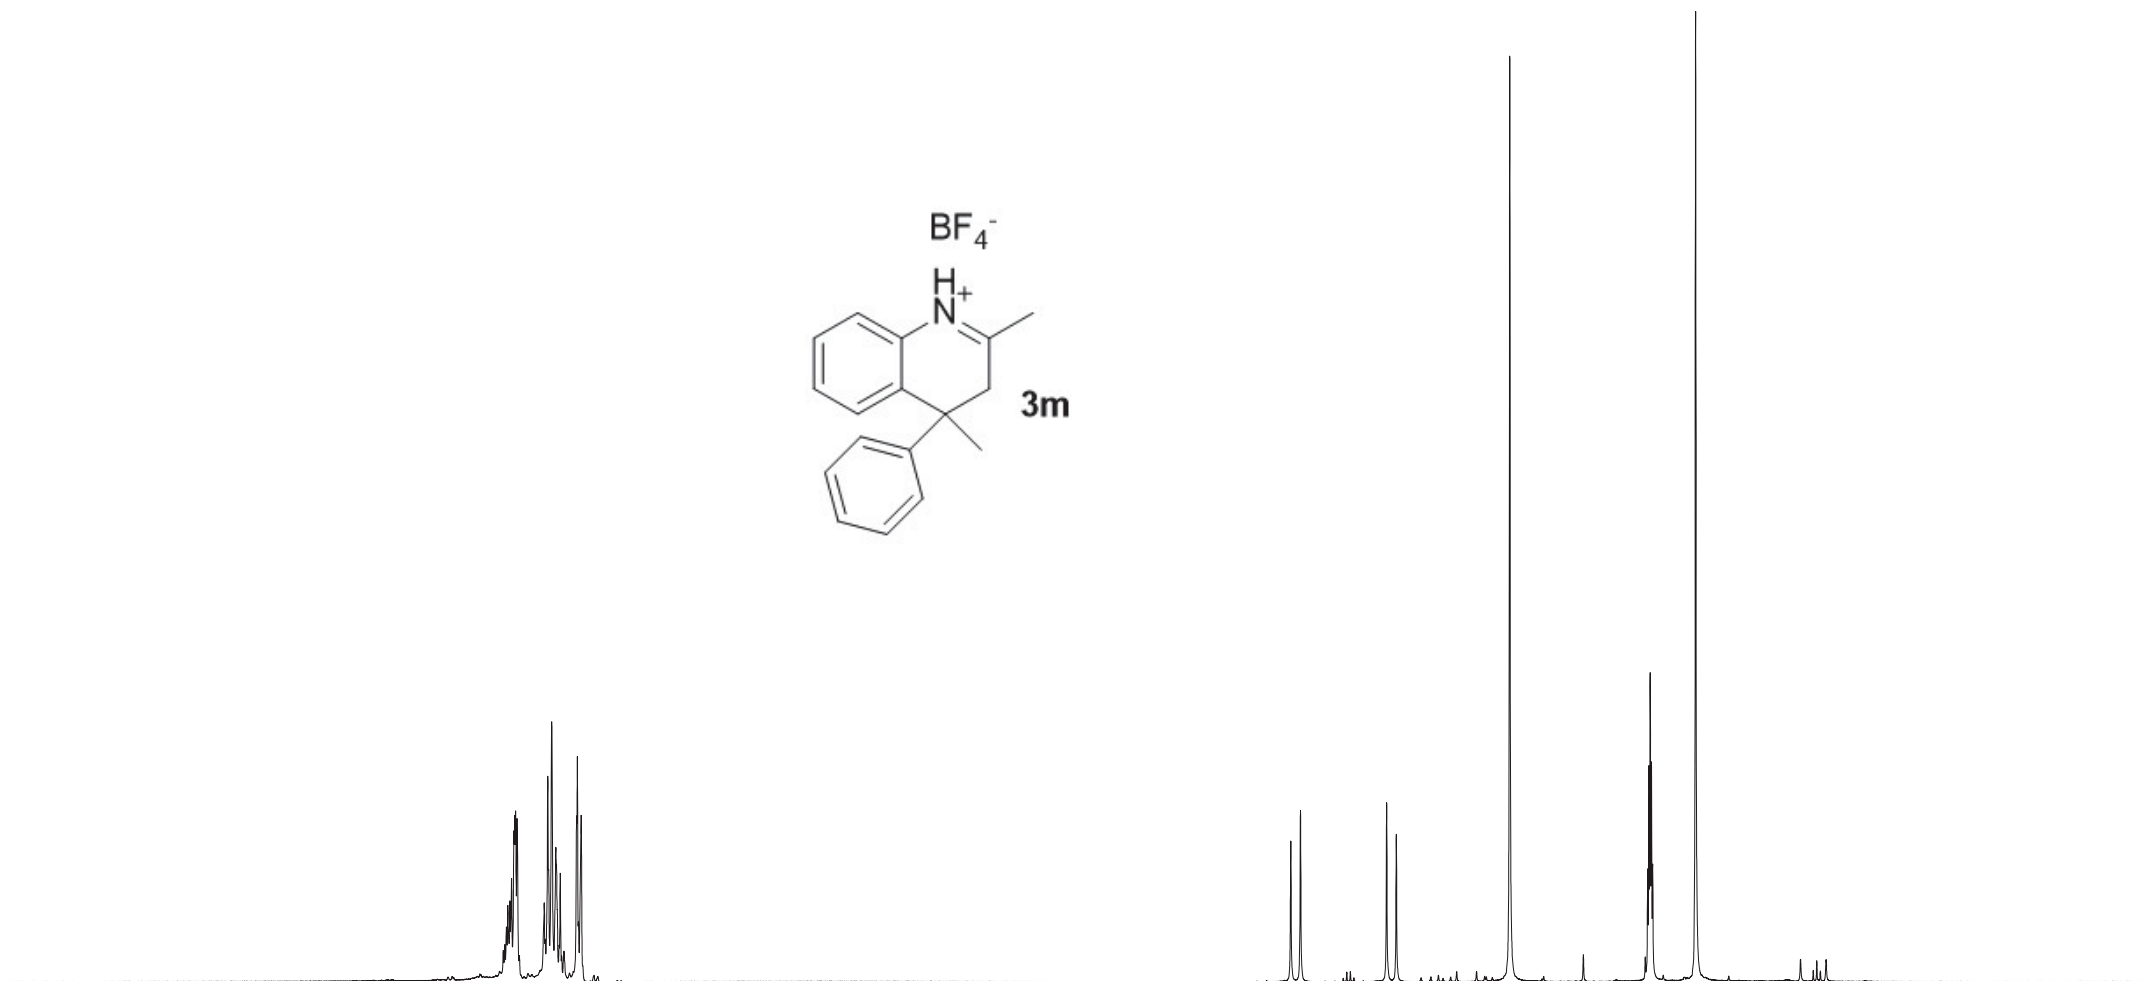

3.03  
4.01  
1.87

0.96

0.95

2.91

3.00

Benzenediazonium salt, alpha-methylstyrene, 80deg, 2 hours, white solid

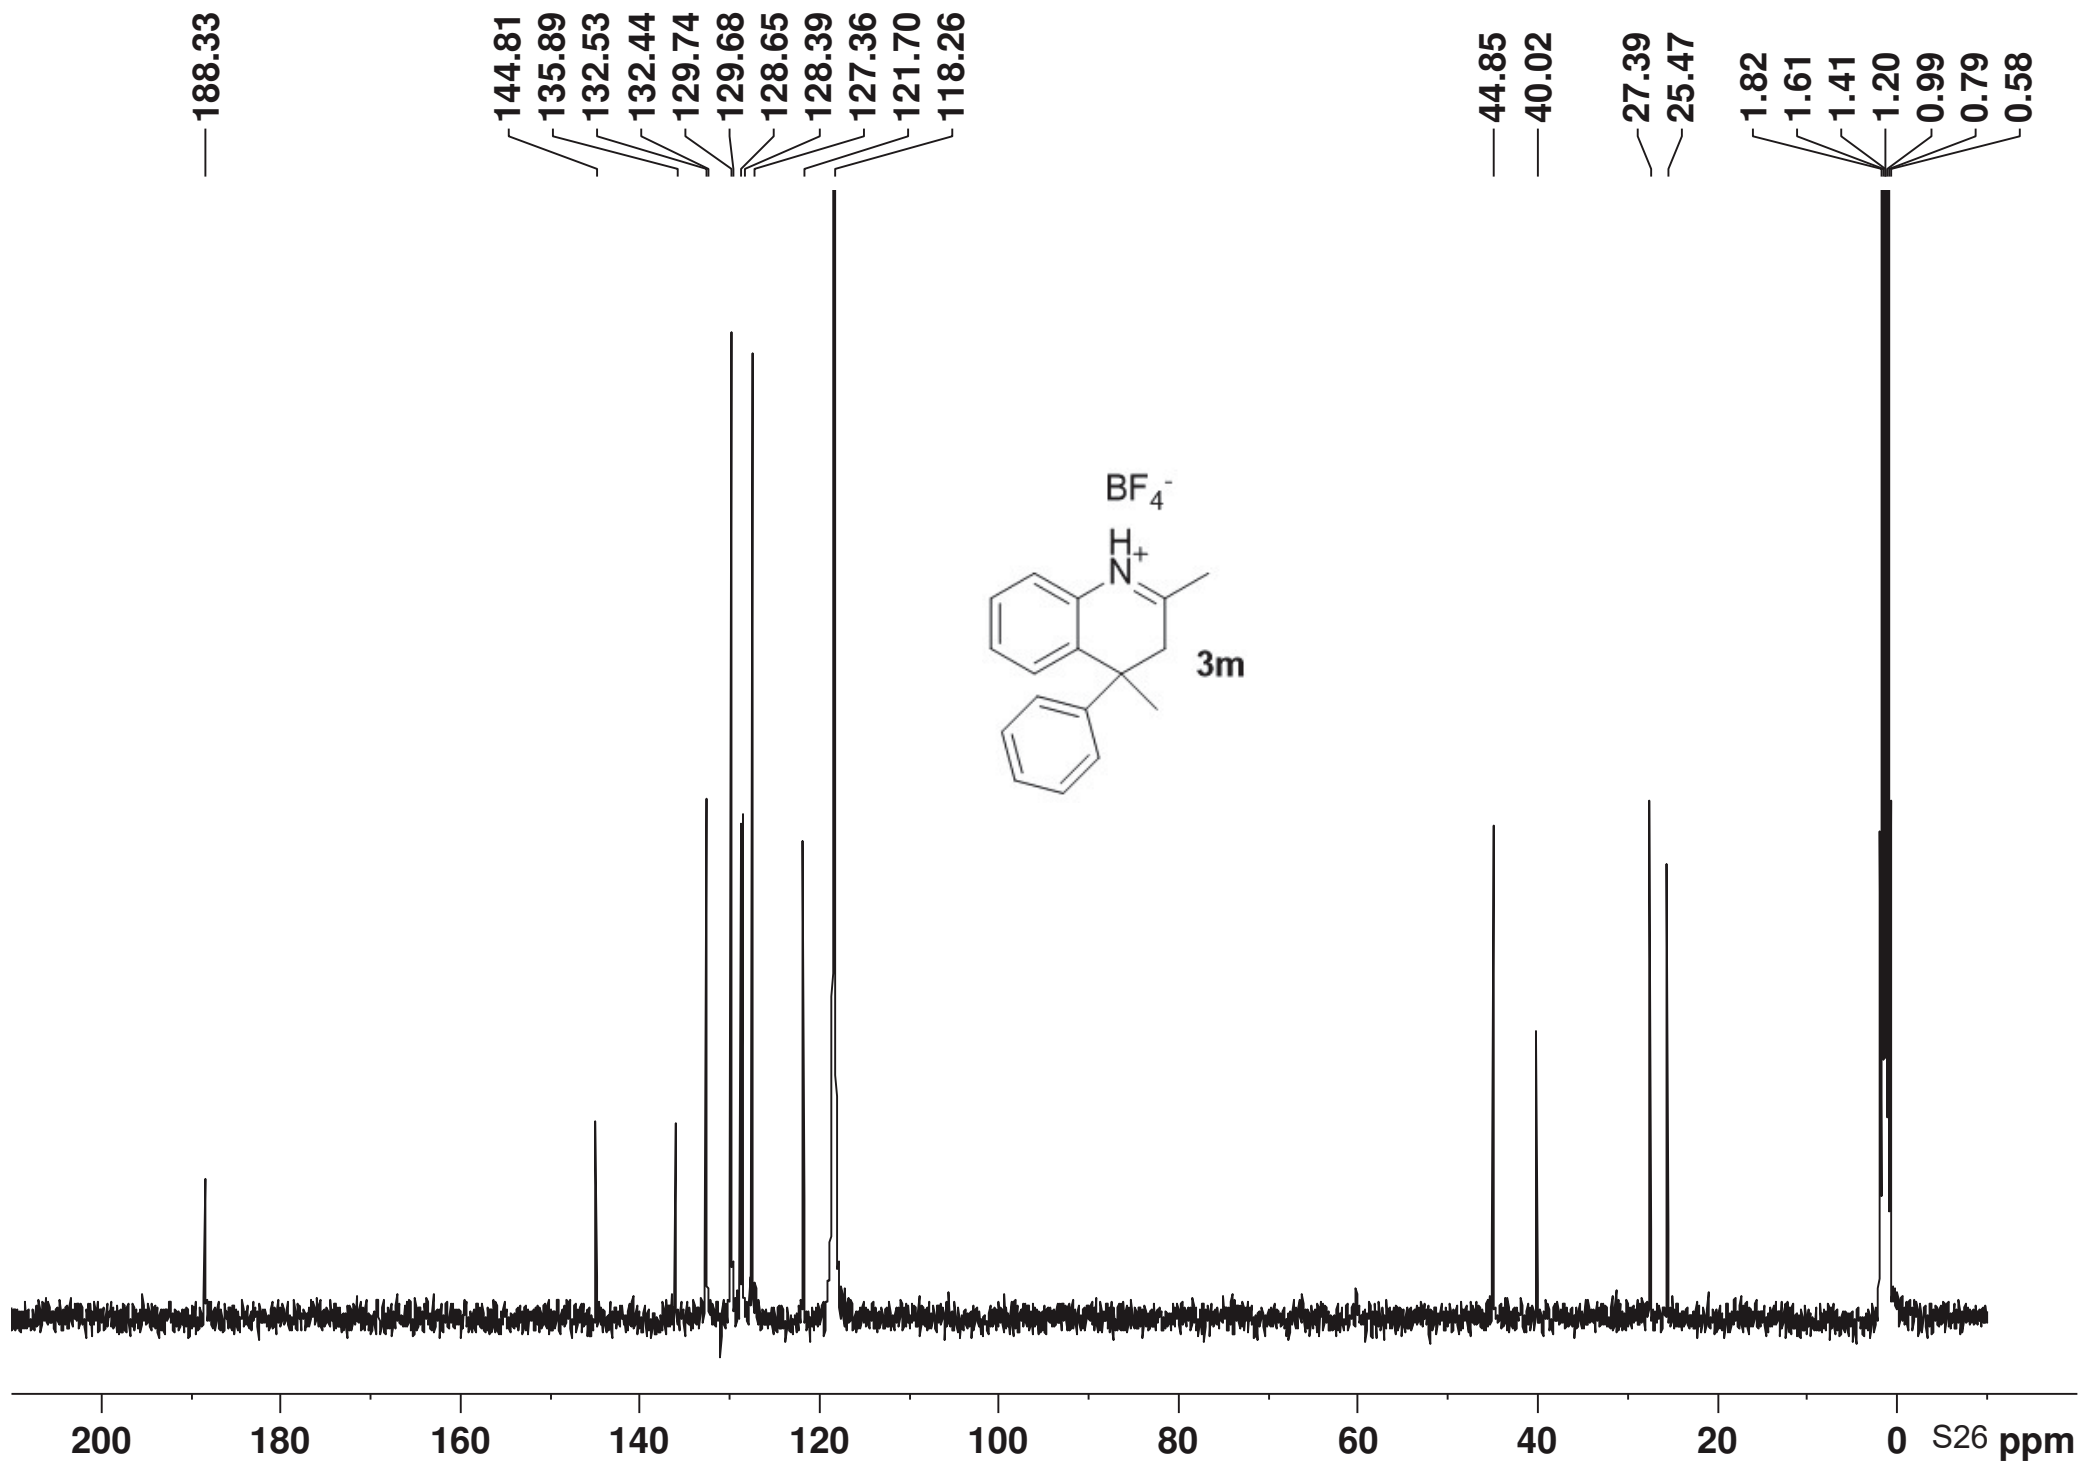

Phdiazonium salt, dry MeCN, norborylne, 80deg, 2h, pale yellow solid

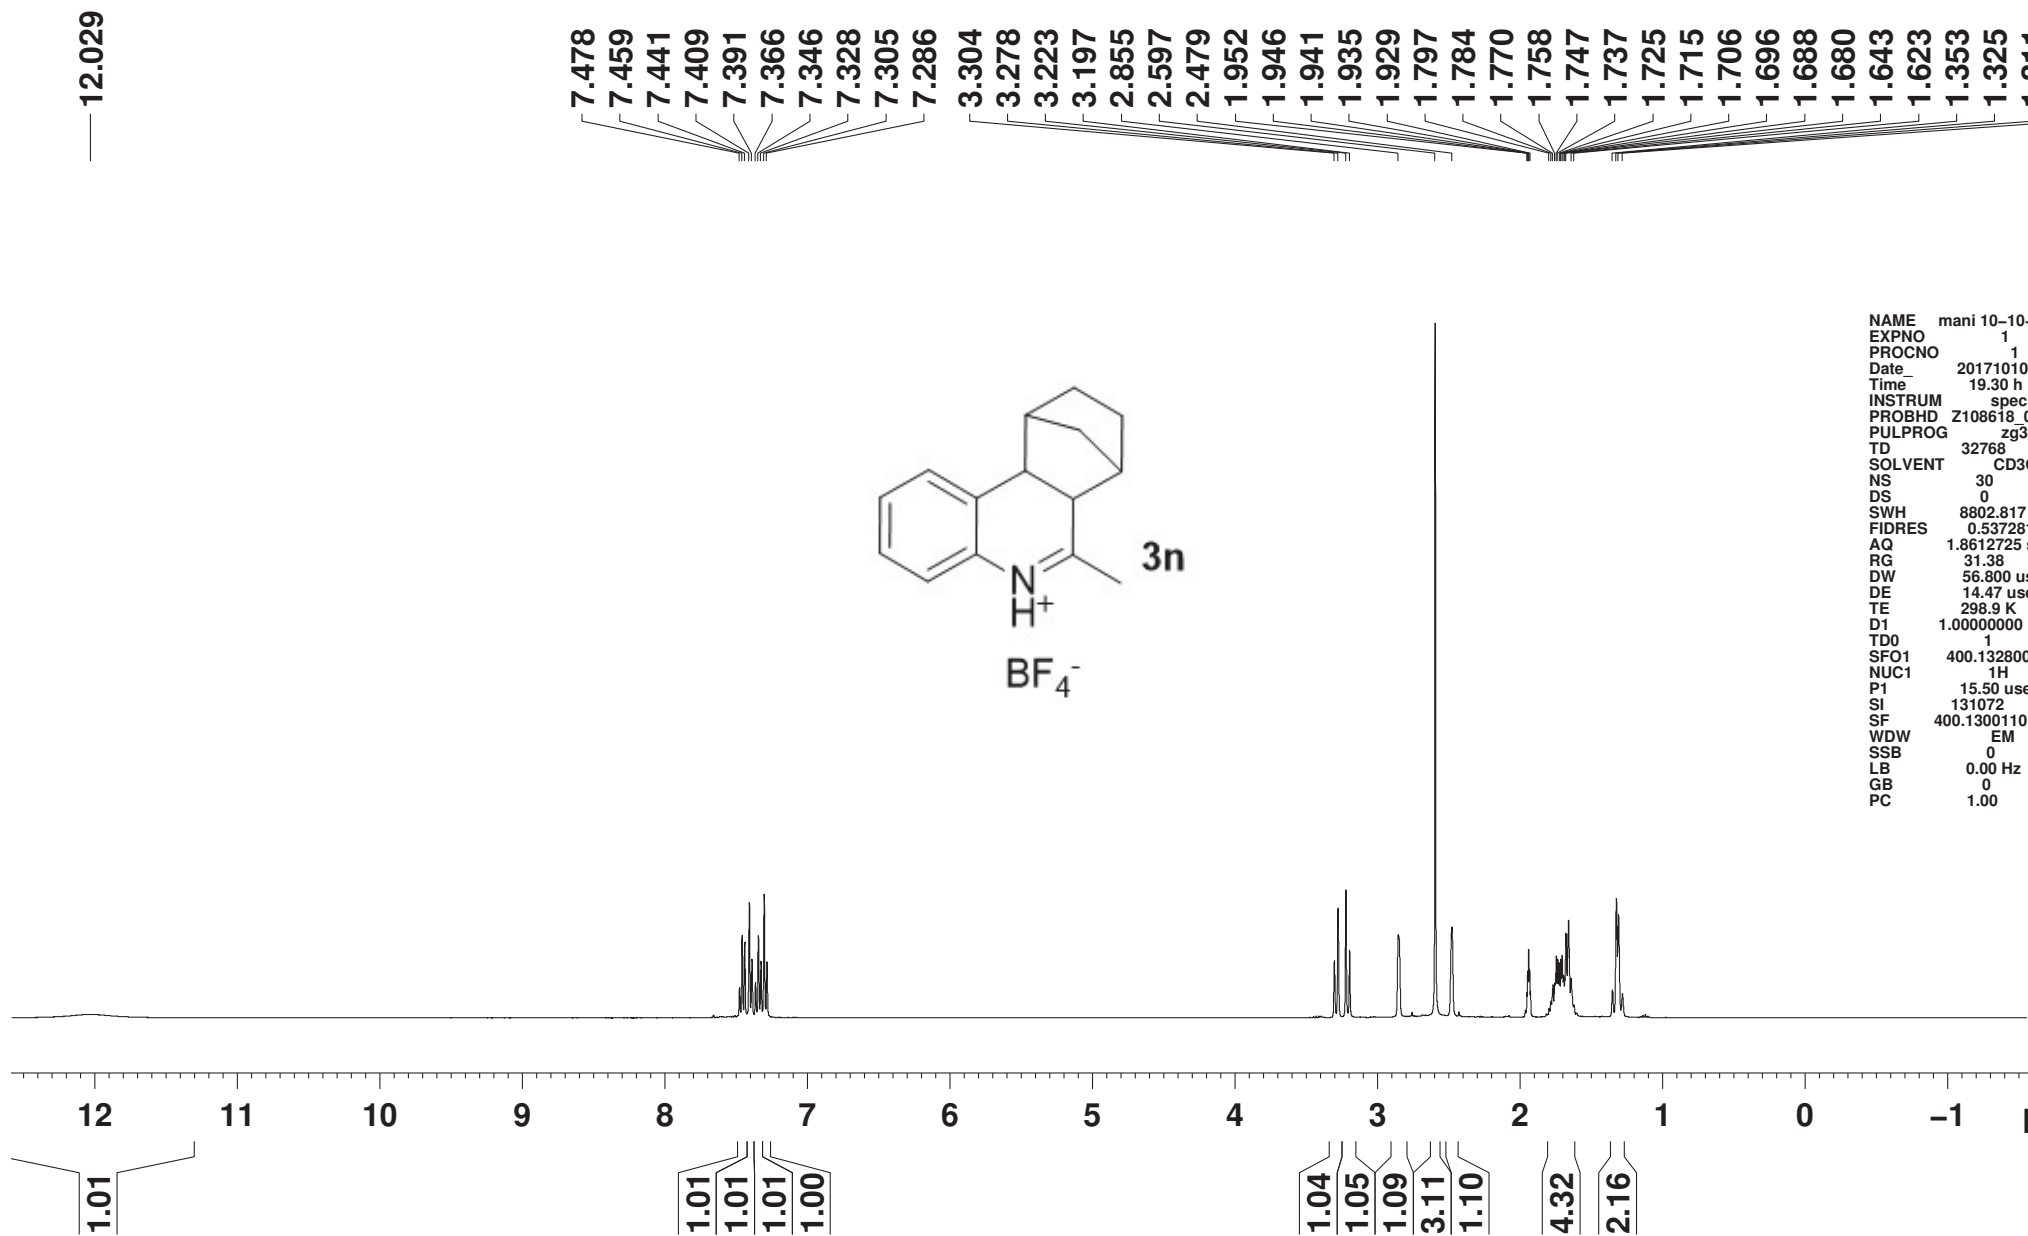

Phdiazonium salt, dry MeCN, norborylne, 80deg, 2h, pale yellow solid

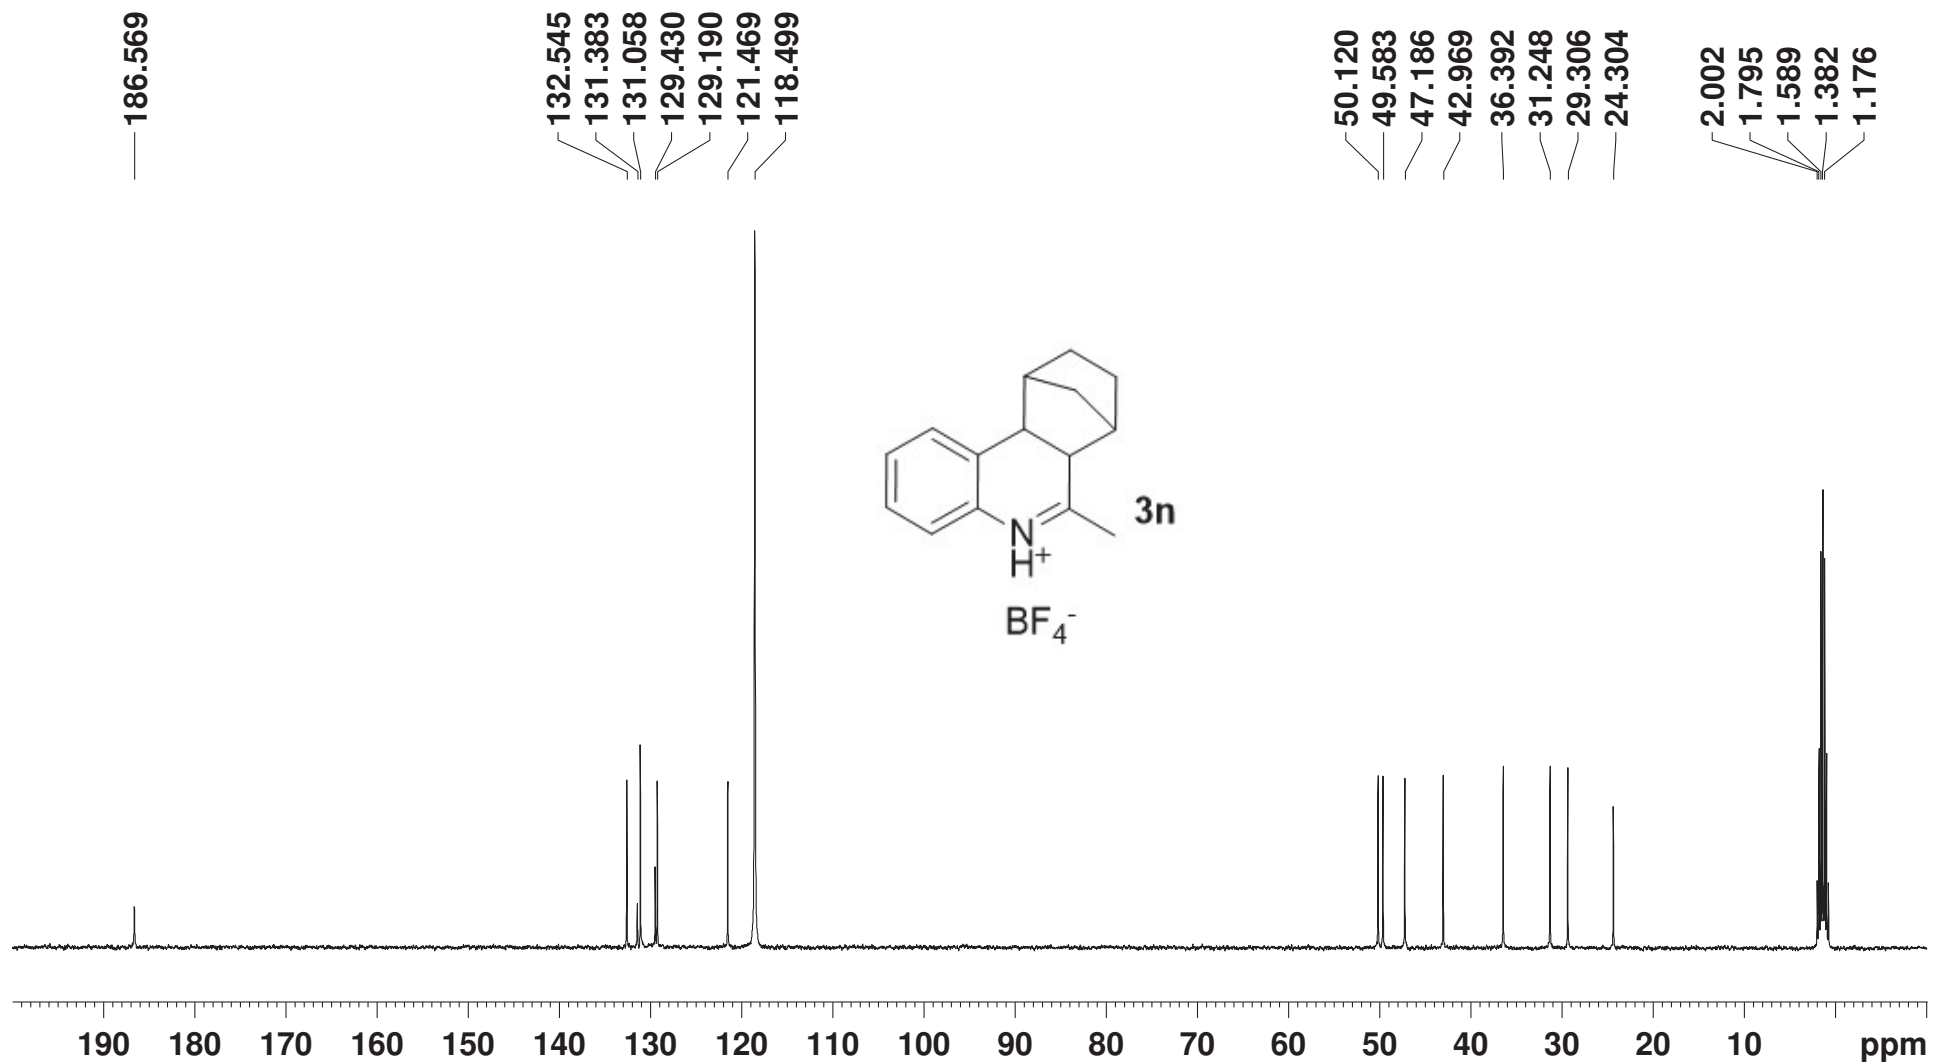

Phdiazonium salt, Dry benzonitrile, 110deg, 3h, purified

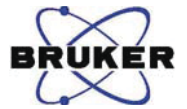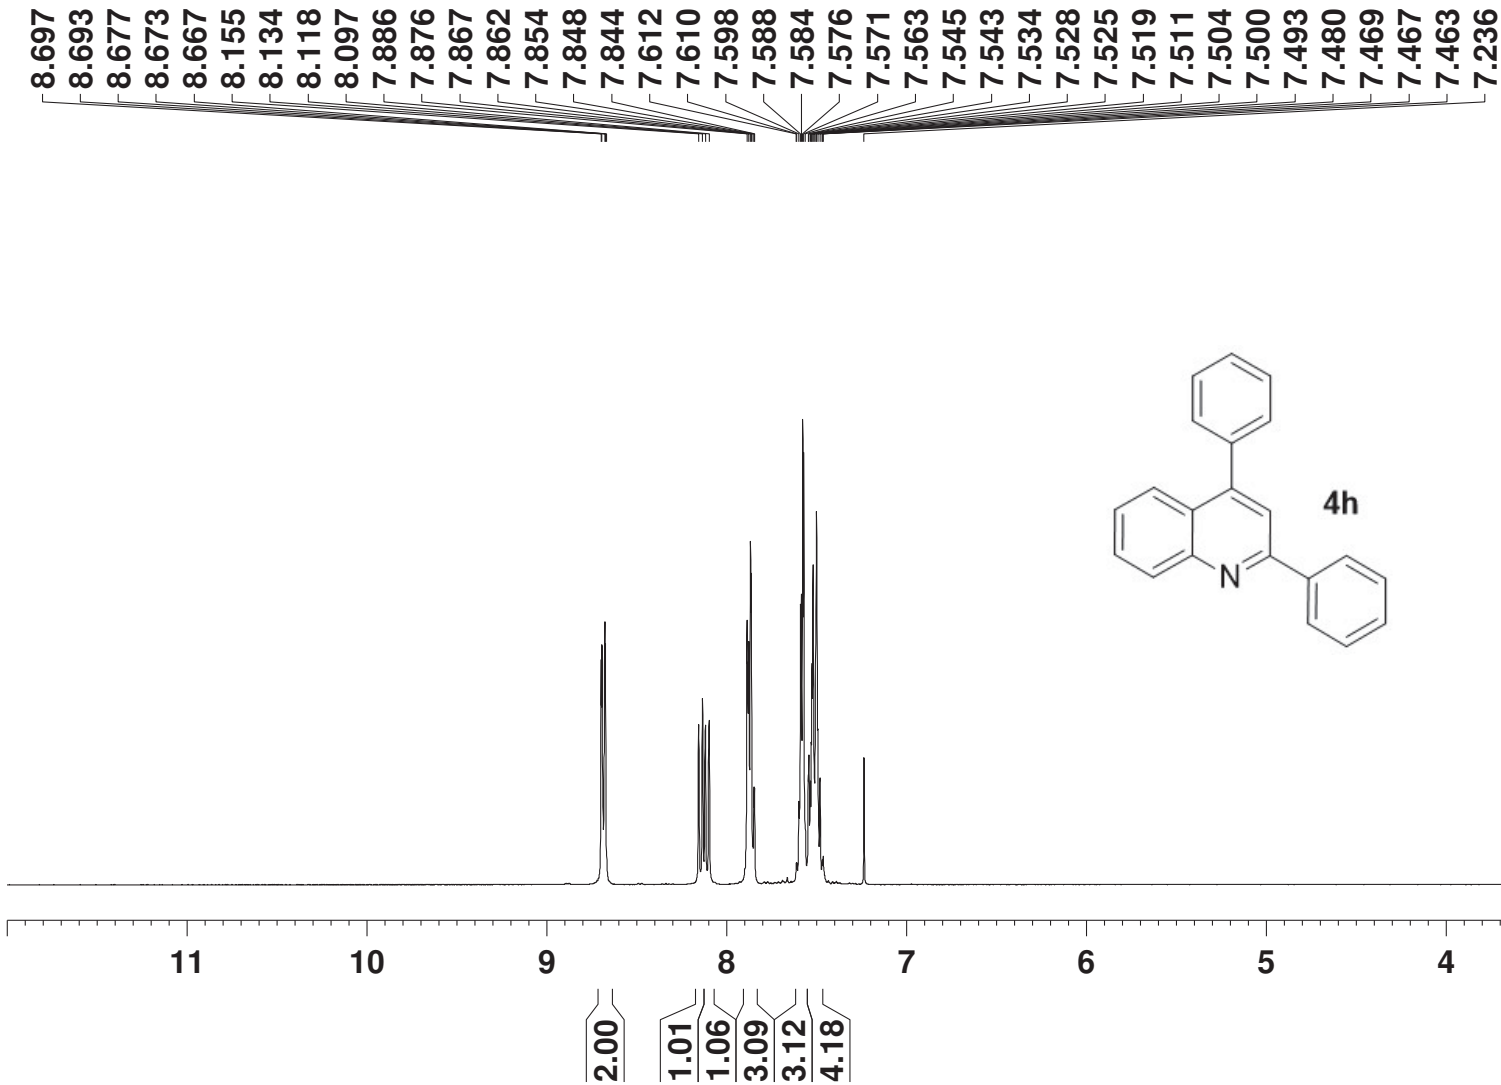

NAME mani 17-05  
EXPNO 5  
PROCNO 1  
Date\_ 20170511  
Time 21.20  
INSTRUM spec  
PROBHD 5 mm PAL  
PULPROG zg'  
TD 32768  
SOLVENT CDC  
NS 30  
DS 0  
SWH 8223.682  
FIDRES 0.25096  
AQ 1.9923444  
RG 144  
DW 60.800 u  
DE 6.50 us  
TE 299.9 K  
D1 1.0000000  
TD0 1

===== CHANNEL  
NUC1 1H  
P1 12.65 us  
PL1 -1.00 dl  
PL1W 13.439680  
SFO1 400.15280  
SI 32768  
SF 400.150020  
WDW EM  
SSB 0  
LB 0.30 Hz  
GB 0  
PC 1.00

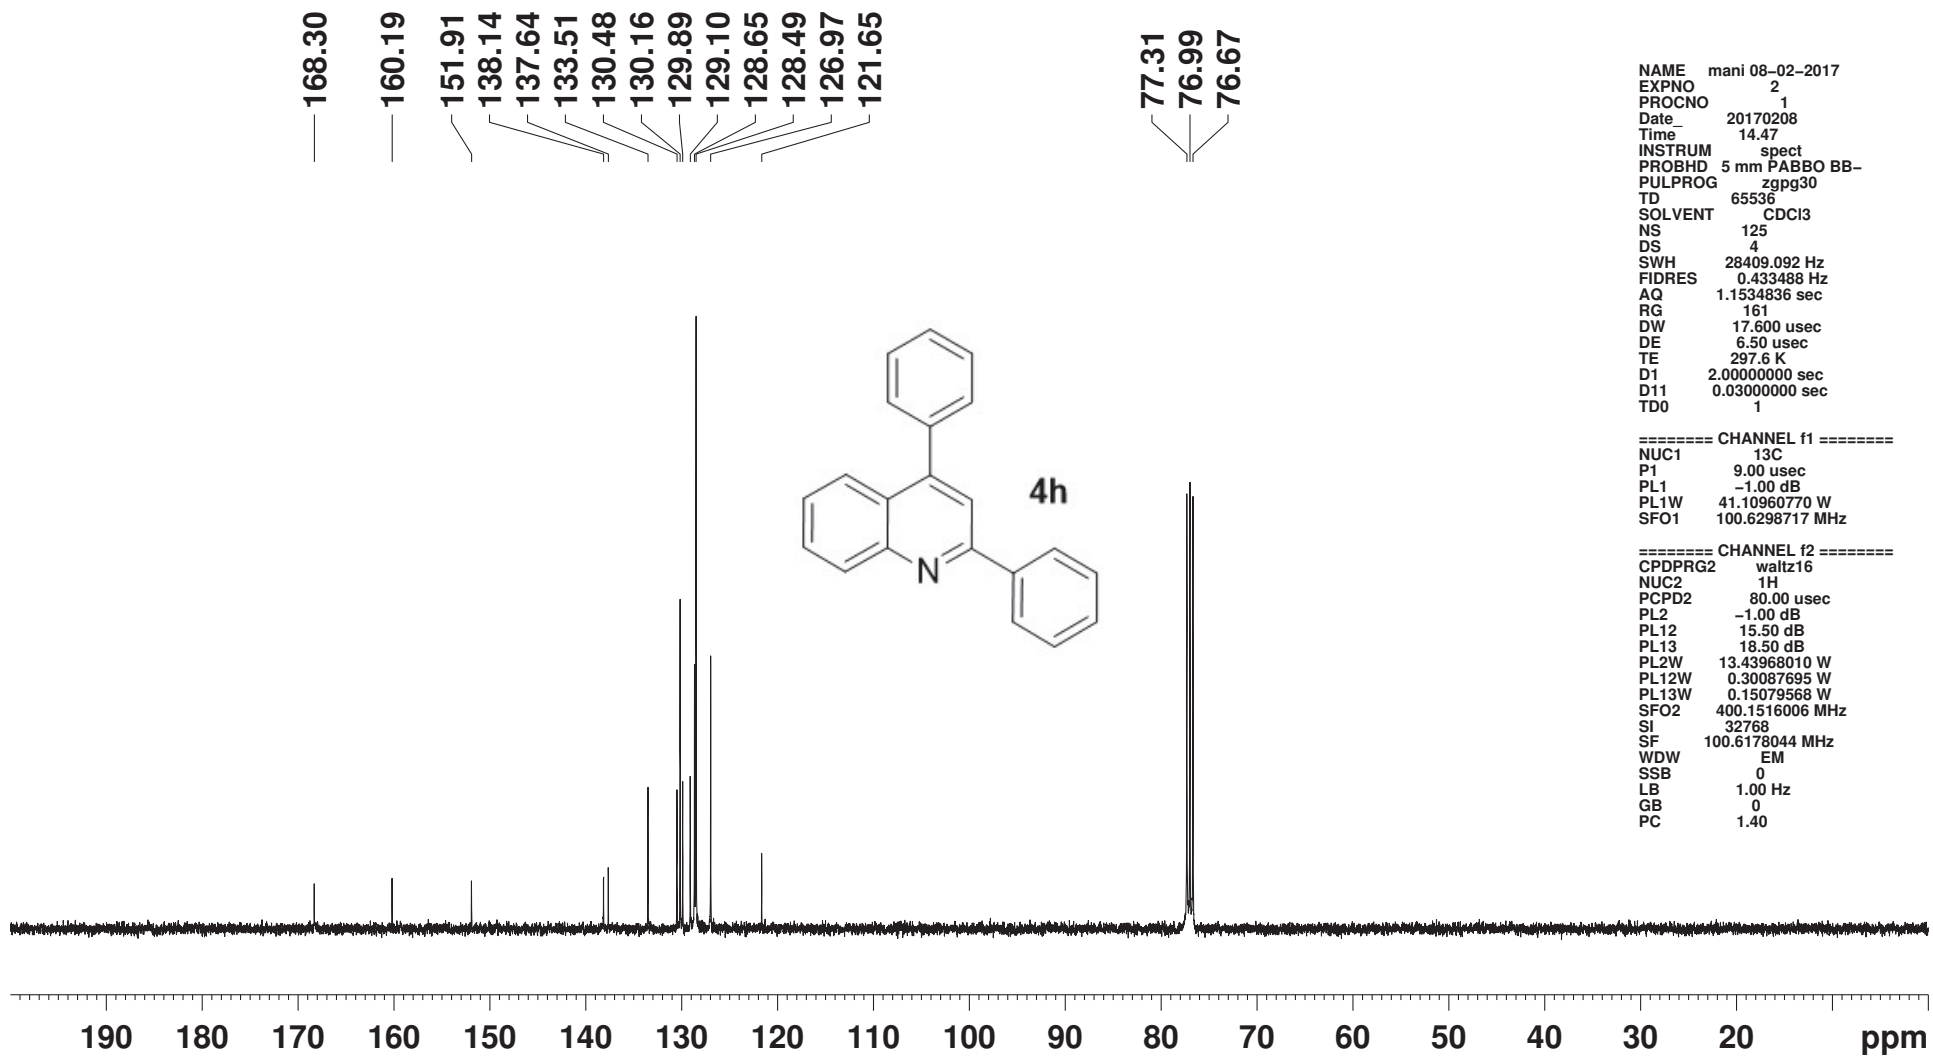

```

NAME man1 08-02-2017
EXPNO 2
PROCNO 1
Date_ 20170208
Time 14.47
INSTRUM spect
PROBHD 5 mm PABBO BB-
PULPROG zgpg30
TD 65536
SOLVENT CDCl3
NS 125
DS 4
SWH 28409.092 Hz
FIDRES 0.433488 Hz
AQ 1.1534836 sec
RG 161
DW 17.600 usec
DE 6.50 usec
TE 297.6 K
D1 2.00000000 sec
D11 0.03000000 sec
TD0 1

```

```

===== CHANNEL f1 =====
NUC1 13C
P1 9.00 usec
PL1 -1.00 dB
PL1W 41.10960770 W
SFO1 100.6298717 MHz

```

```

===== CHANNEL f2 =====
CPDPRG2 waltz16
NUC2 1H
PCPD2 80.00 usec
PL2 -1.00 dB
PL12 15.50 dB
PL13 18.50 dB
PL2W 13.43968010 W
PL12W 0.30087695 W
PL13W 0.15079568 W
SFO2 400.1516006 MHz
SI 32768
SF 100.6178044 MHz
WDW EM
SSB 0
LB 1.00 Hz
GB 0
PC 1.40

```

Ph diazonium salt, phenyl acetylene, dry MeCN, sealed tube, 120deg, 3h, purified major spot

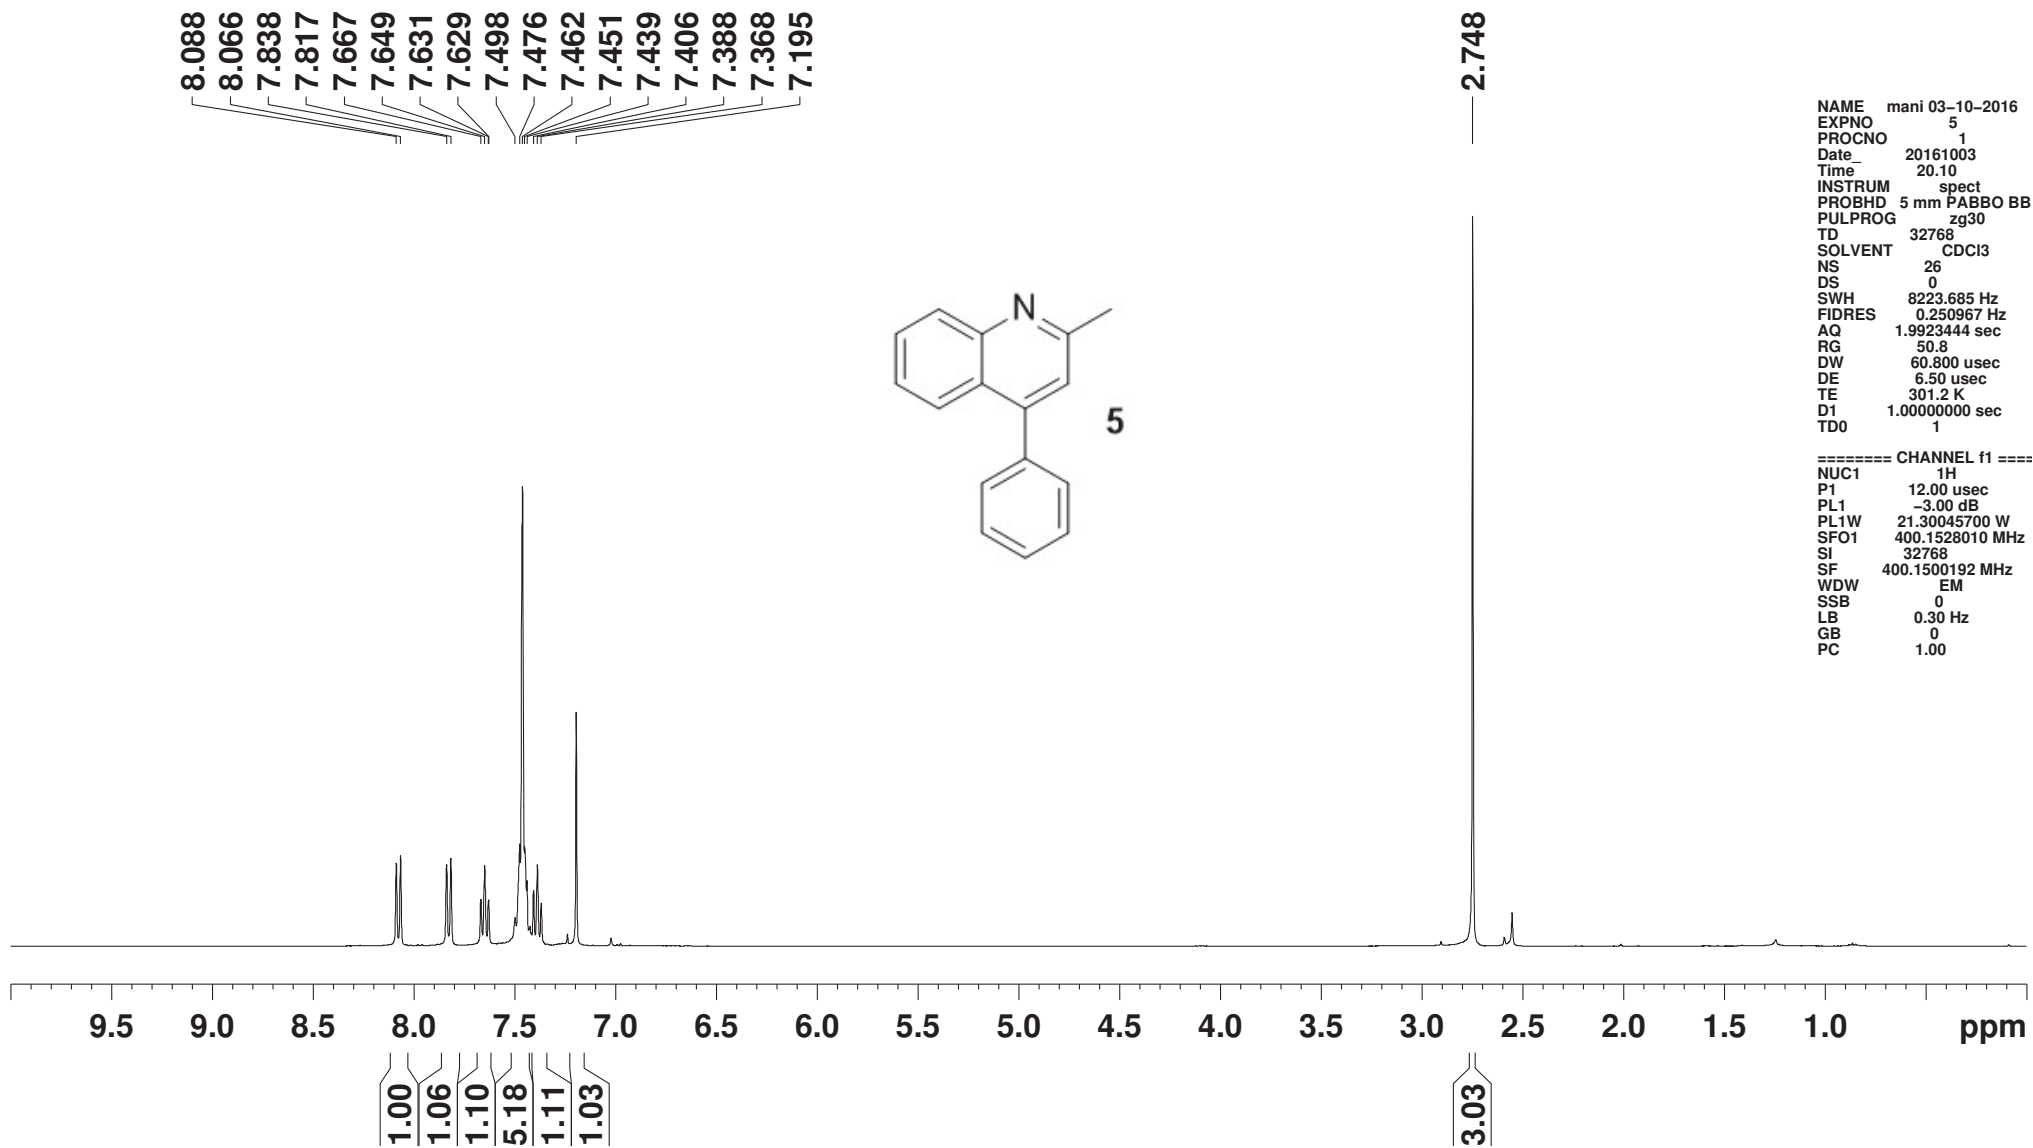



Ph diazonium salt, phenyl acetylene, dry MeCN, sealed tube, 120deg, 3h, purified major spot

158.38  
148.43  
148.33  
138.07  
129.40  
129.20  
128.95  
128.42  
128.22  
125.63  
125.54  
125.00  
122.11

77.33  
77.01  
76.69

25.25

NAME mani 03-10-2016  
EXPNO 6  
PROCNO 1  
Date\_ 20161003  
Time 20.15  
INSTRUM spect  
PROBHD 5 mm PABBO BB-  
PULPROG zgpg30  
TD 65536  
SOLVENT CDCl3  
NS 100  
DS 4  
SWH 28409.092 Hz  
FIDRES 0.433488 Hz  
AQ 1.1534836 sec  
RG 322  
DW 17.600 usec  
DE 6.50 usec  
TE 301.4 K  
D1 2.00000000 sec  
D11 0.03000000 sec  
TDO 1

===== CHANNEL f1 =====  
NUC1 13C  
P1 9.00 usec  
PL1 -1.00 dB  
PL1W 41.10960770 W  
SFO1 100.6298717 MHz

===== CHANNEL f2 =====  
CPDPRG2 waltz16  
NUC2 1H  
PCPD2 80.00 usec  
PL2 -1.00 dB  
PL12 15.50 dB  
PL13 18.50 dB  
PL2W 13.43968010 W  
PL12W 0.30087695 W  
PL13W 0.15079568 W  
SFO2 400.1516006 MHz  
SI 32768  
SF 100.6178078 MHz  
WDW EM  
SSB 0  
LB 1.00 Hz  
GB 0  
PC 1.40

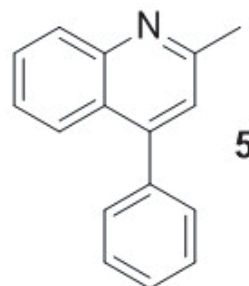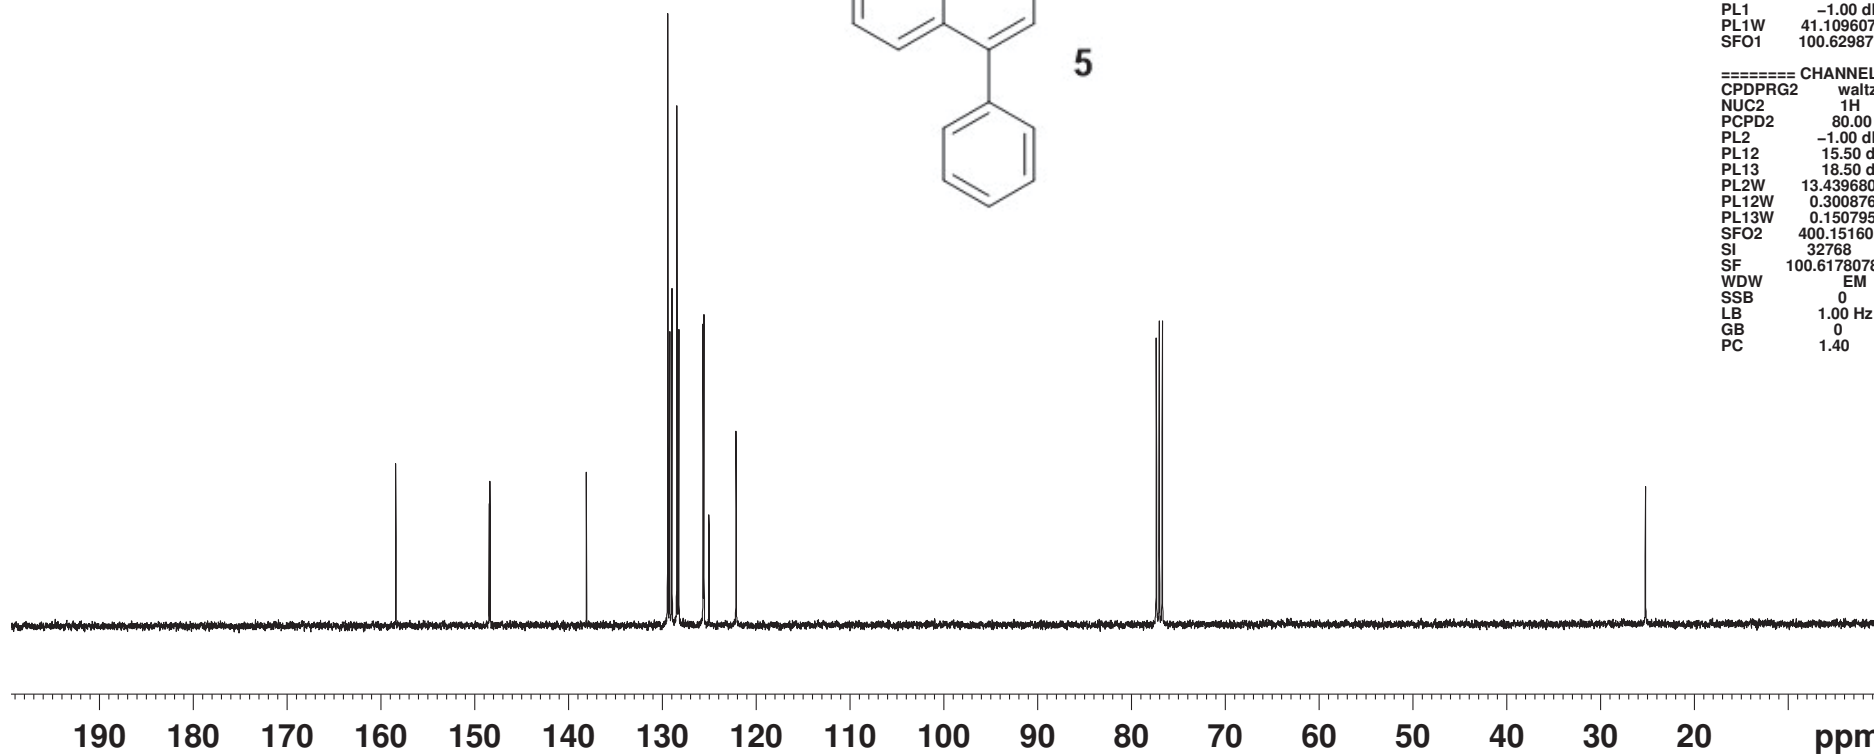

Phdiazonium salt, Dry MeCN, Styrene, 80deg, 2h, aq.wkp-rt, 48h-purified bottom spot

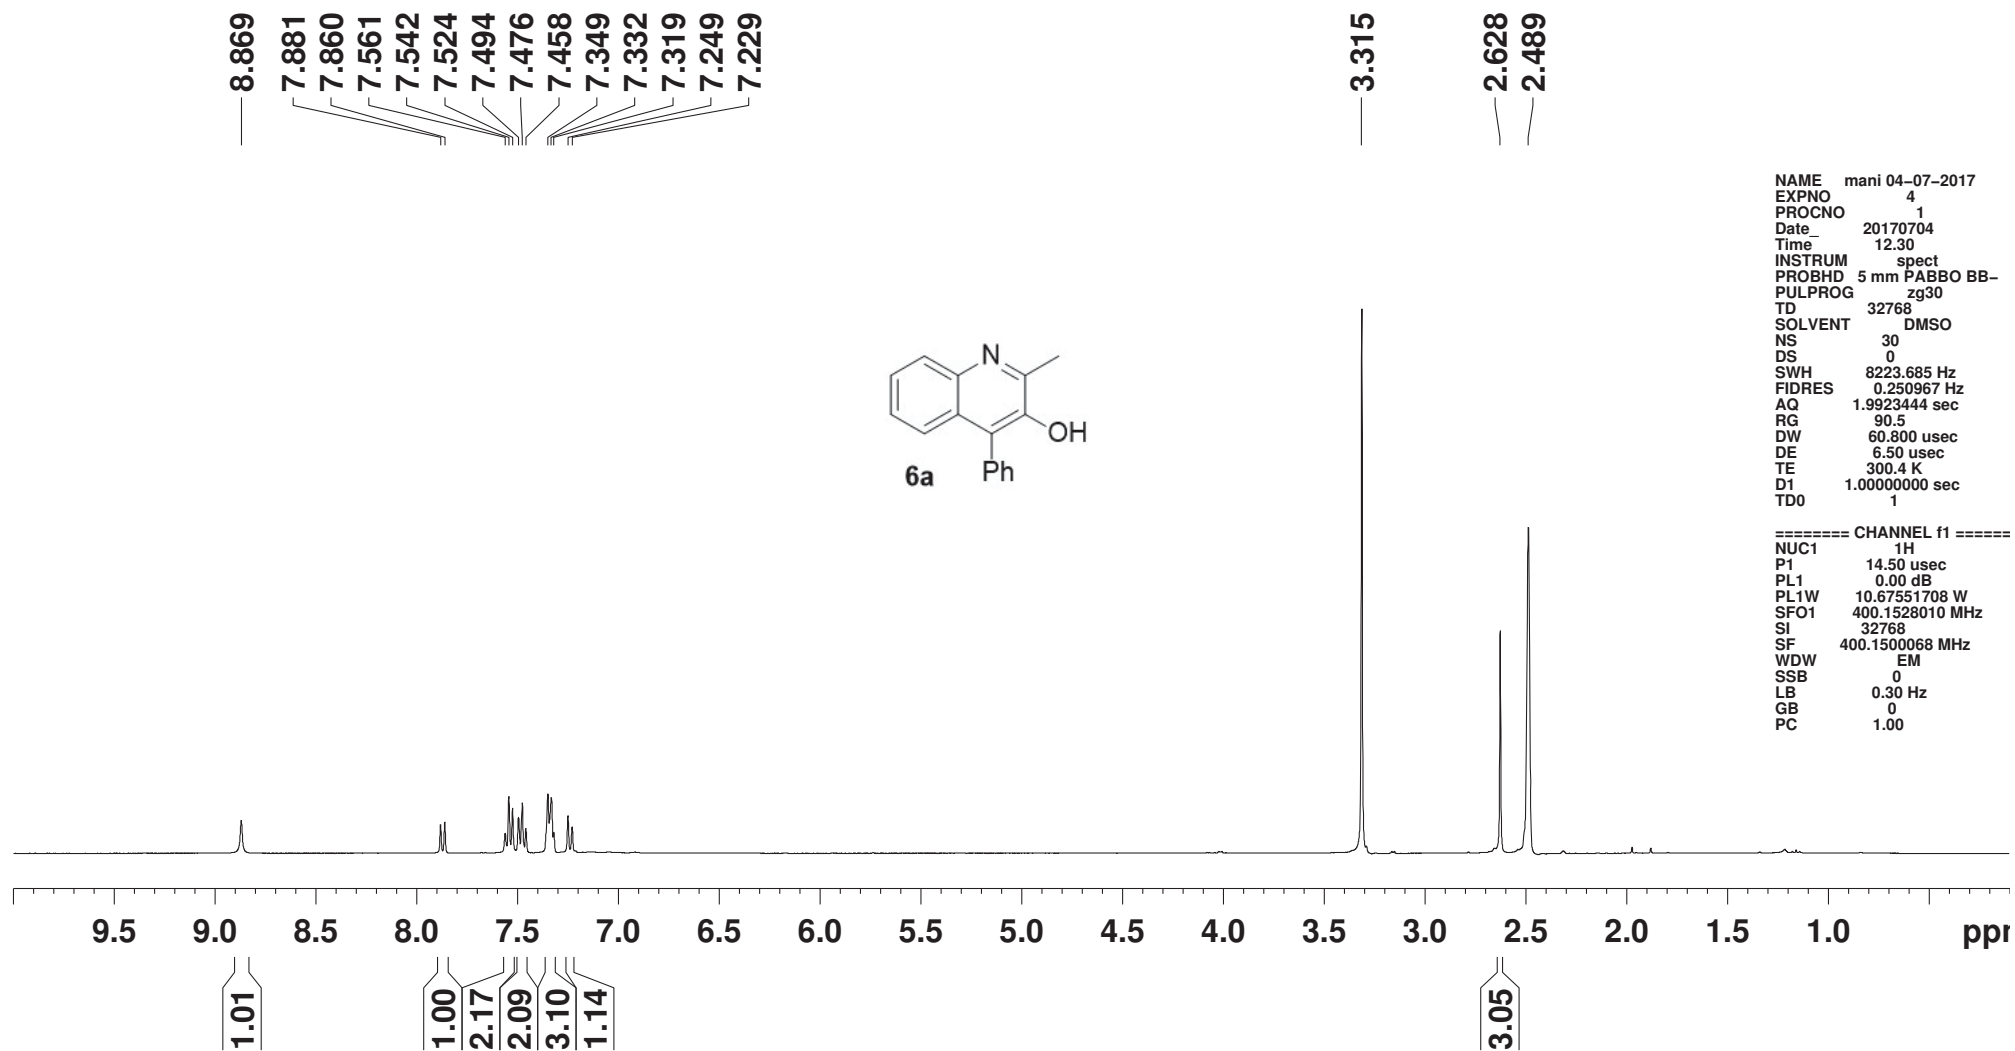

Phdiazonium salt, Dry MeCN, Styrene, 80deg, 2h, aq.wkp-rt, 48h-purified bottom spot

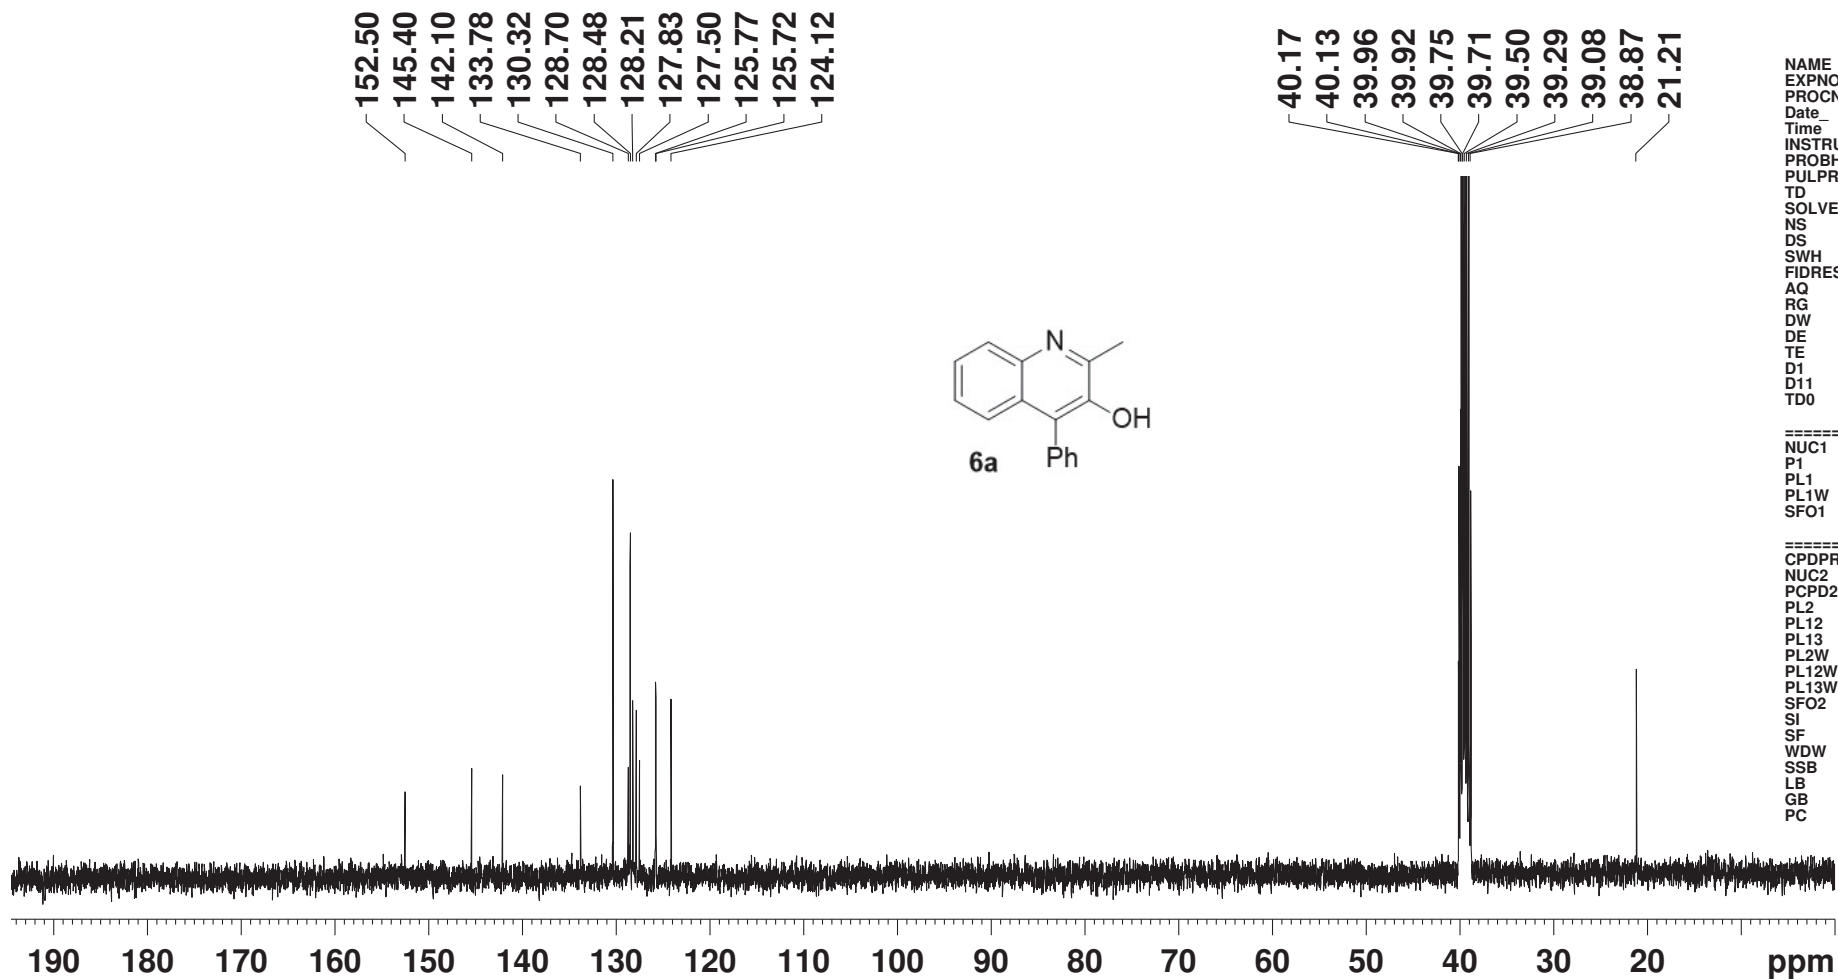

NAME mani 04-07-2017  
EXPNO 5  
PROCNO 1  
Date\_ 20170704  
Time 12.40  
INSTRUM spect  
PROBHD 5 mm PABBO BB-  
PULPROG zgpg30  
TD 65536  
SOLVENT DMSO  
NS 355  
DS 4  
SWH 28409.092 Hz  
FIDRES 0.433488 Hz  
AQ 1.1534836 sec  
RG 256  
DW 17.600 usec  
DE 6.50 usec  
TE 301.2 K  
D1 2.0000000 sec  
D11 0.0300000 sec  
TD0 1

===== CHANNEL f1 =====  
NUC1 13C  
P1 9.00 usec  
PL1 -1.00 dB  
PL1W 41.10960770 W  
SFO1 100.6298717 MHz

===== CHANNEL f2 =====  
CPDPRG2 waltz16  
NUC2 1H  
PCPD2 80.00 usec  
PL2 -1.00 dB  
PL12 15.50 dB  
PL13 18.50 dB  
PL2W 13.43968010 W  
PL12W 0.30087695 W  
PL13W 0.15079568 W  
SFO2 400.1516006 MHz  
SI 32768  
SF 100.6178491 MHz  
WDW EM  
SSB 0  
LB 1.00 Hz  
GB 0  
PC 1.40

8.977  
7.885  
7.864  
7.613  
7.593  
7.502  
7.499  
7.485  
7.481  
7.464  
7.461  
7.371  
7.366  
7.351  
7.344  
7.326  
7.241  
7.221

4.878

3.337  
2.629  
2.512  
2.507  
2.494  
2.490  
2.486

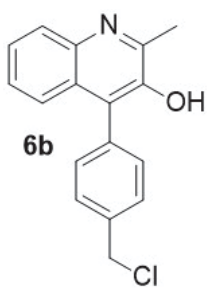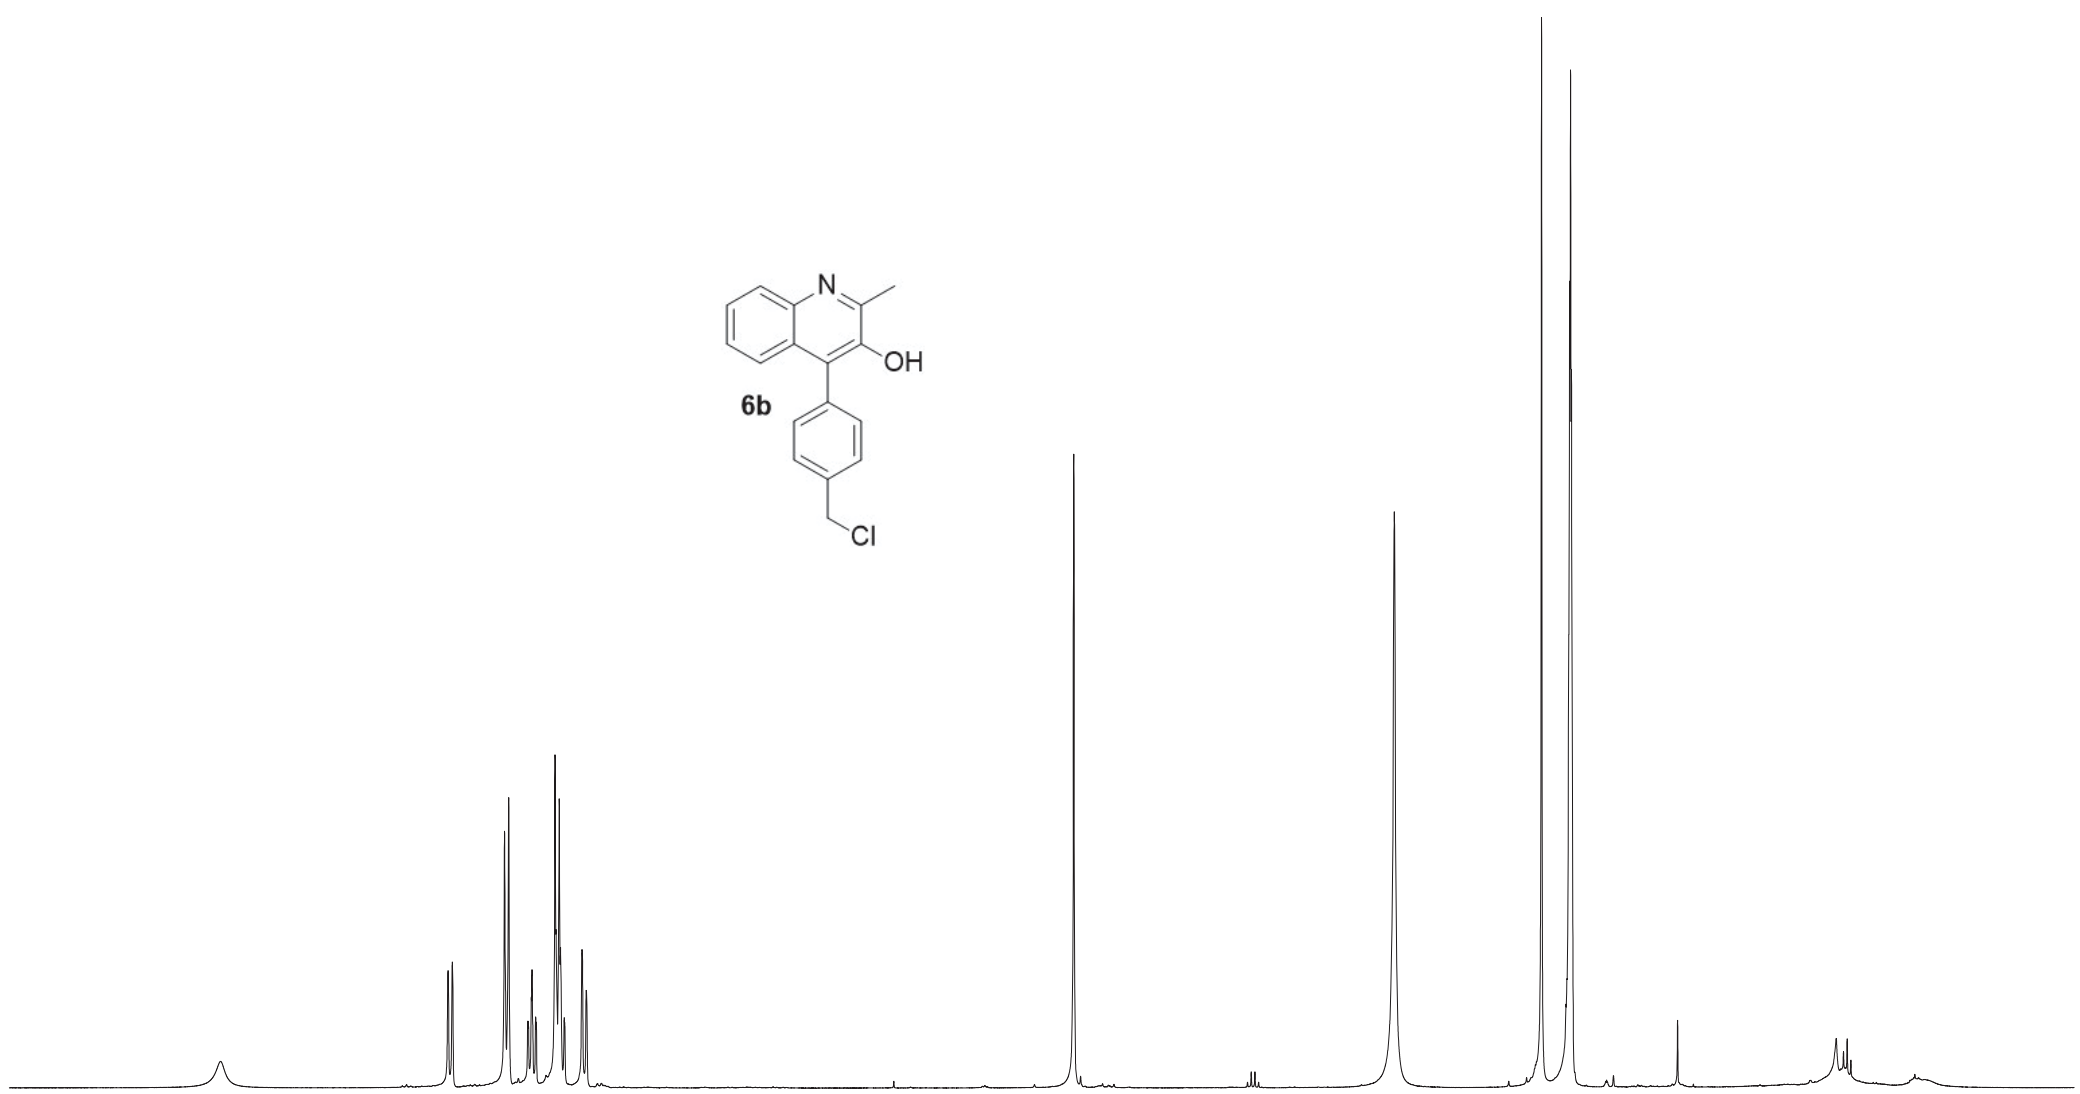

9.5 9.0 8.5 8.0 7.5 7.0 6.5 6.0 5.5 5.0 4.5 4.0 3.5 3.0 2.5 2.0 1.5 1.0 ppm

0.92  
1.05  
2.17  
1.18  
3.27  
1.09

2.13

3.00

152.56  
145.48  
142.08  
137.11  
133.90  
130.68  
128.99  
128.25  
128.19  
127.38  
125.84  
124.02

46.00  
40.12  
39.92  
39.71  
39.50  
39.29  
39.08  
38.87  
21.25

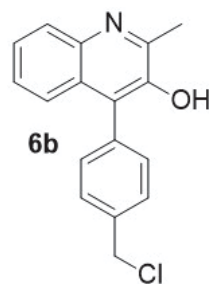

180 170 160 150 140 130 120 110 100 90 80 70 60 50 40 30 20 47 ppm

S36

7.878  
7.857  
7.604  
7.583  
7.496  
7.479  
7.461  
7.458  
7.380  
7.375  
7.359  
7.352  
7.334  
7.236  
7.216

3.333

2.613  
2.494  
2.490  
2.486

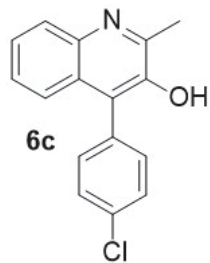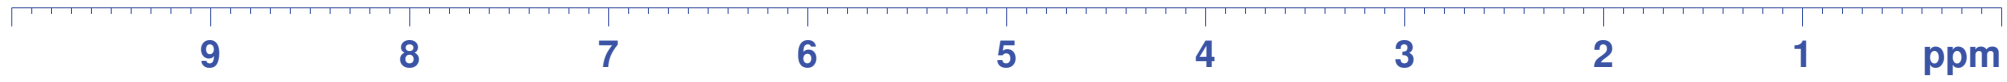

0.96  
1.97  
1.04  
3.12  
1.03

3.00

152.61  
145.68  
141.96  
132.71  
132.36  
128.64  
128.29  
127.28  
127.19  
125.96  
125.85  
123.88

21.24

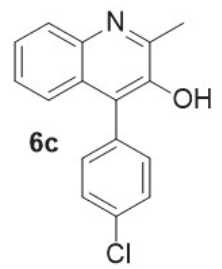

180 170 160 150 140 130 120 110 100 90 80 70 60 50 40 30 20 10 ppm

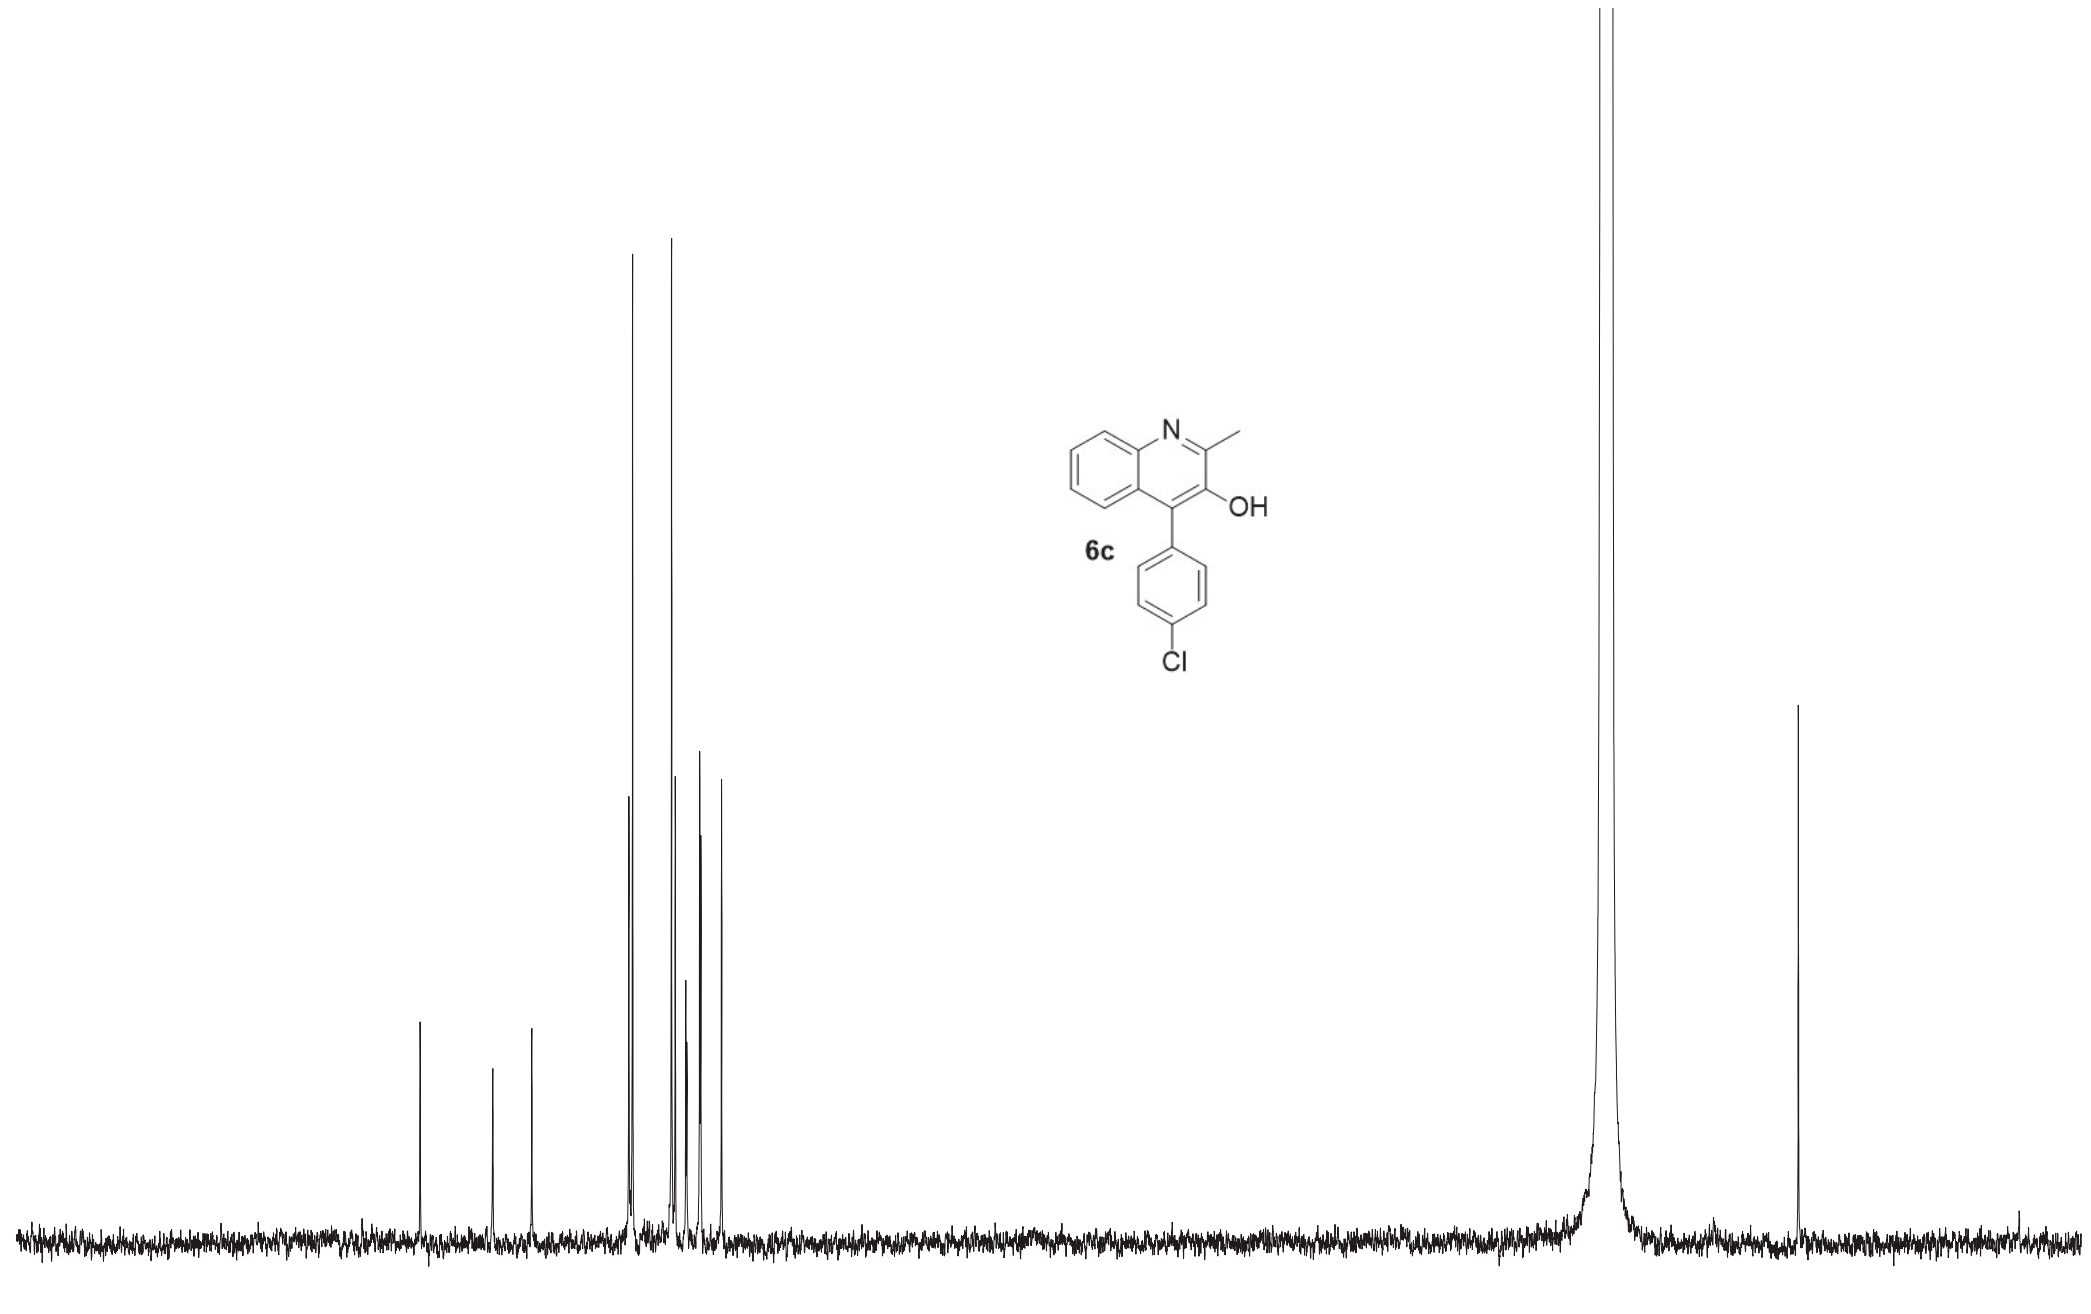

8.783  
7.773  
7.752  
7.557  
7.540  
7.521  
7.489  
7.470  
7.331  
7.327  
7.321  
7.315  
7.310  
7.299  
7.295  
6.991

3.322  
2.595  
2.494  
2.490  
2.486  
2.298

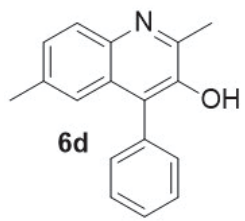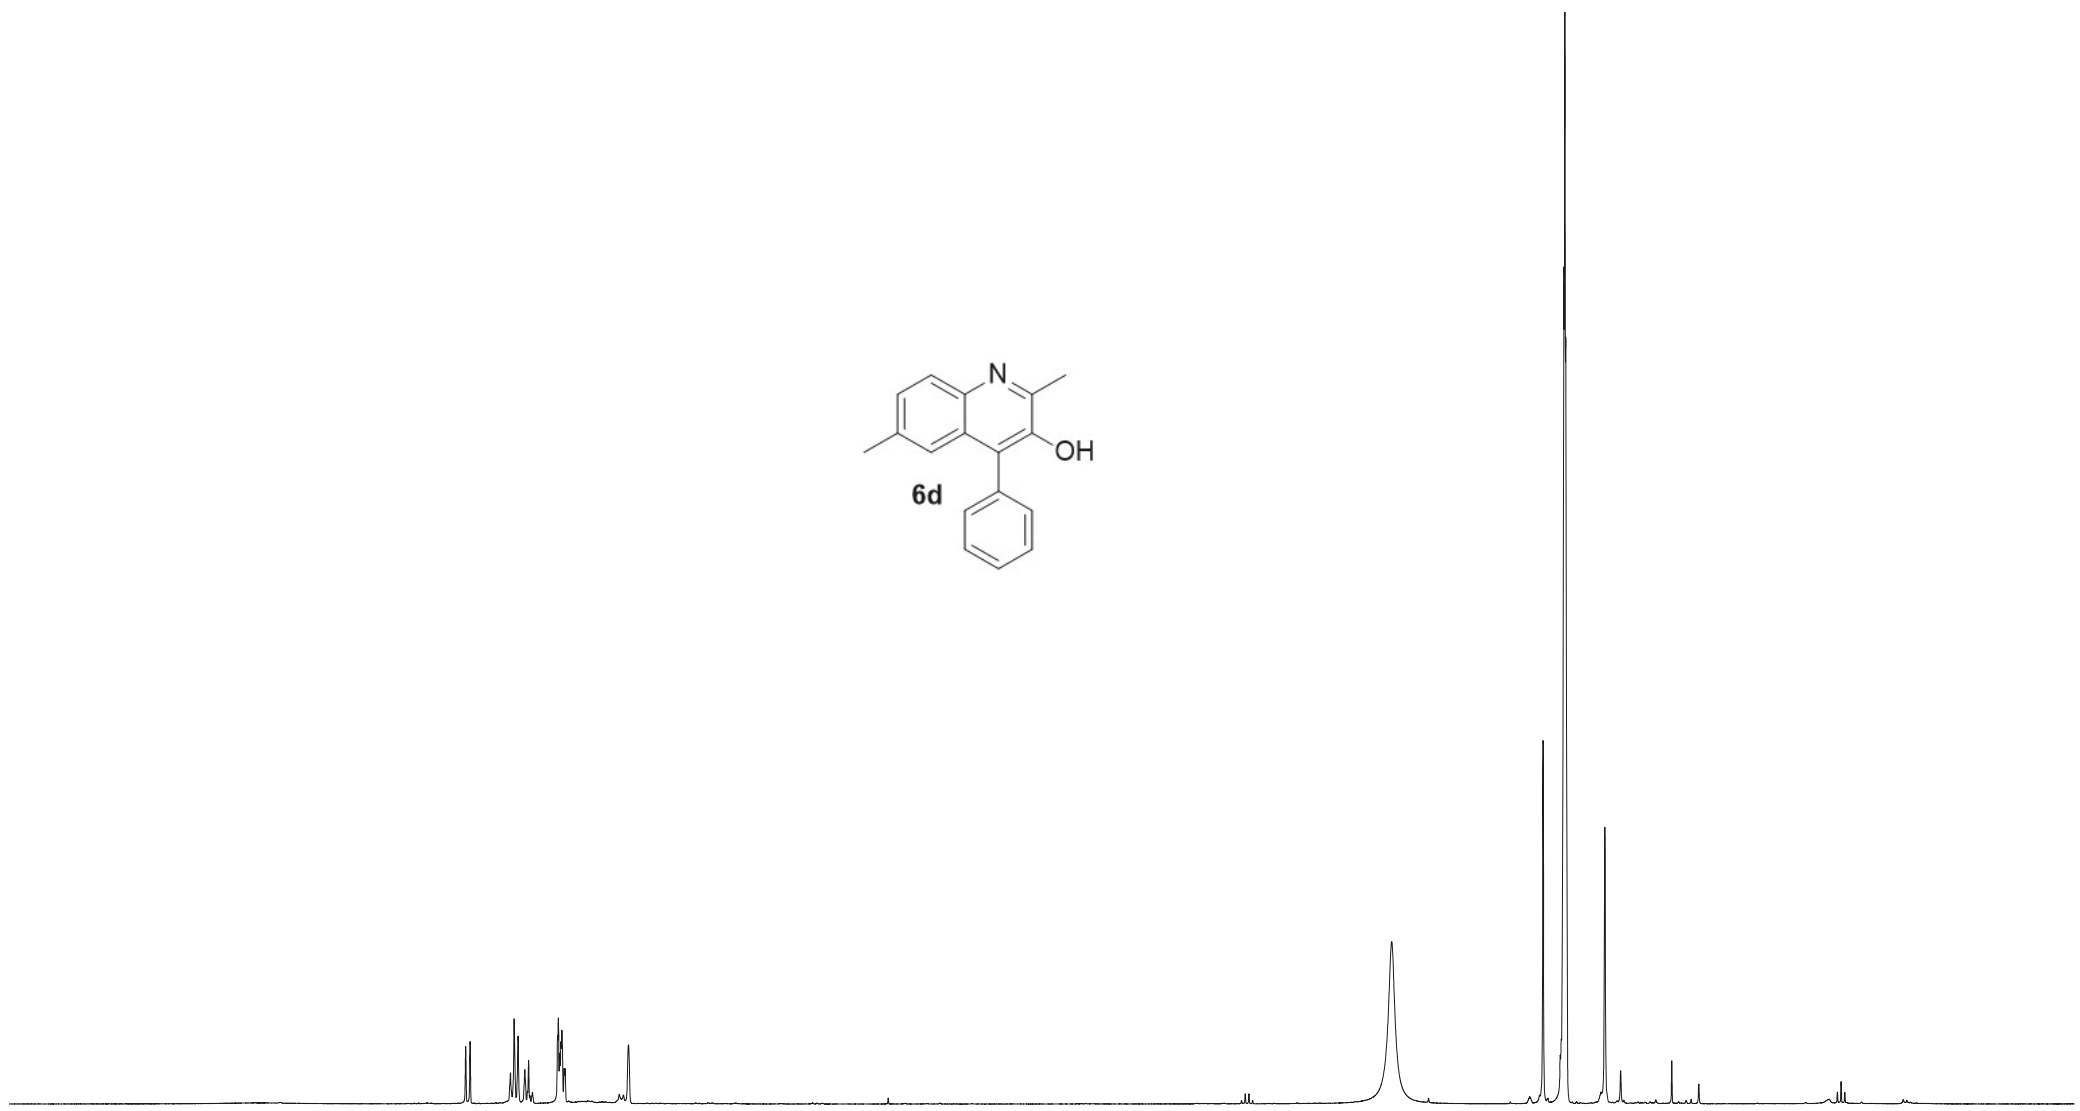

9.5 9.0 8.5 8.0 7.5 7.0 6.5 6.0 5.5 5.0 4.5 4.0 3.5 3.0 2.5 2.0 1.5 1.0 ppm

0.78  
0.98  
2.07  
1.02  
3.01  
0.95

2.88  
3.00



151.37  
145.51  
140.70  
134.89  
133.94  
130.32  
128.50  
128.28  
128.08  
127.86  
127.79  
127.45  
122.93

21.34  
21.10

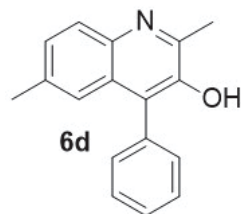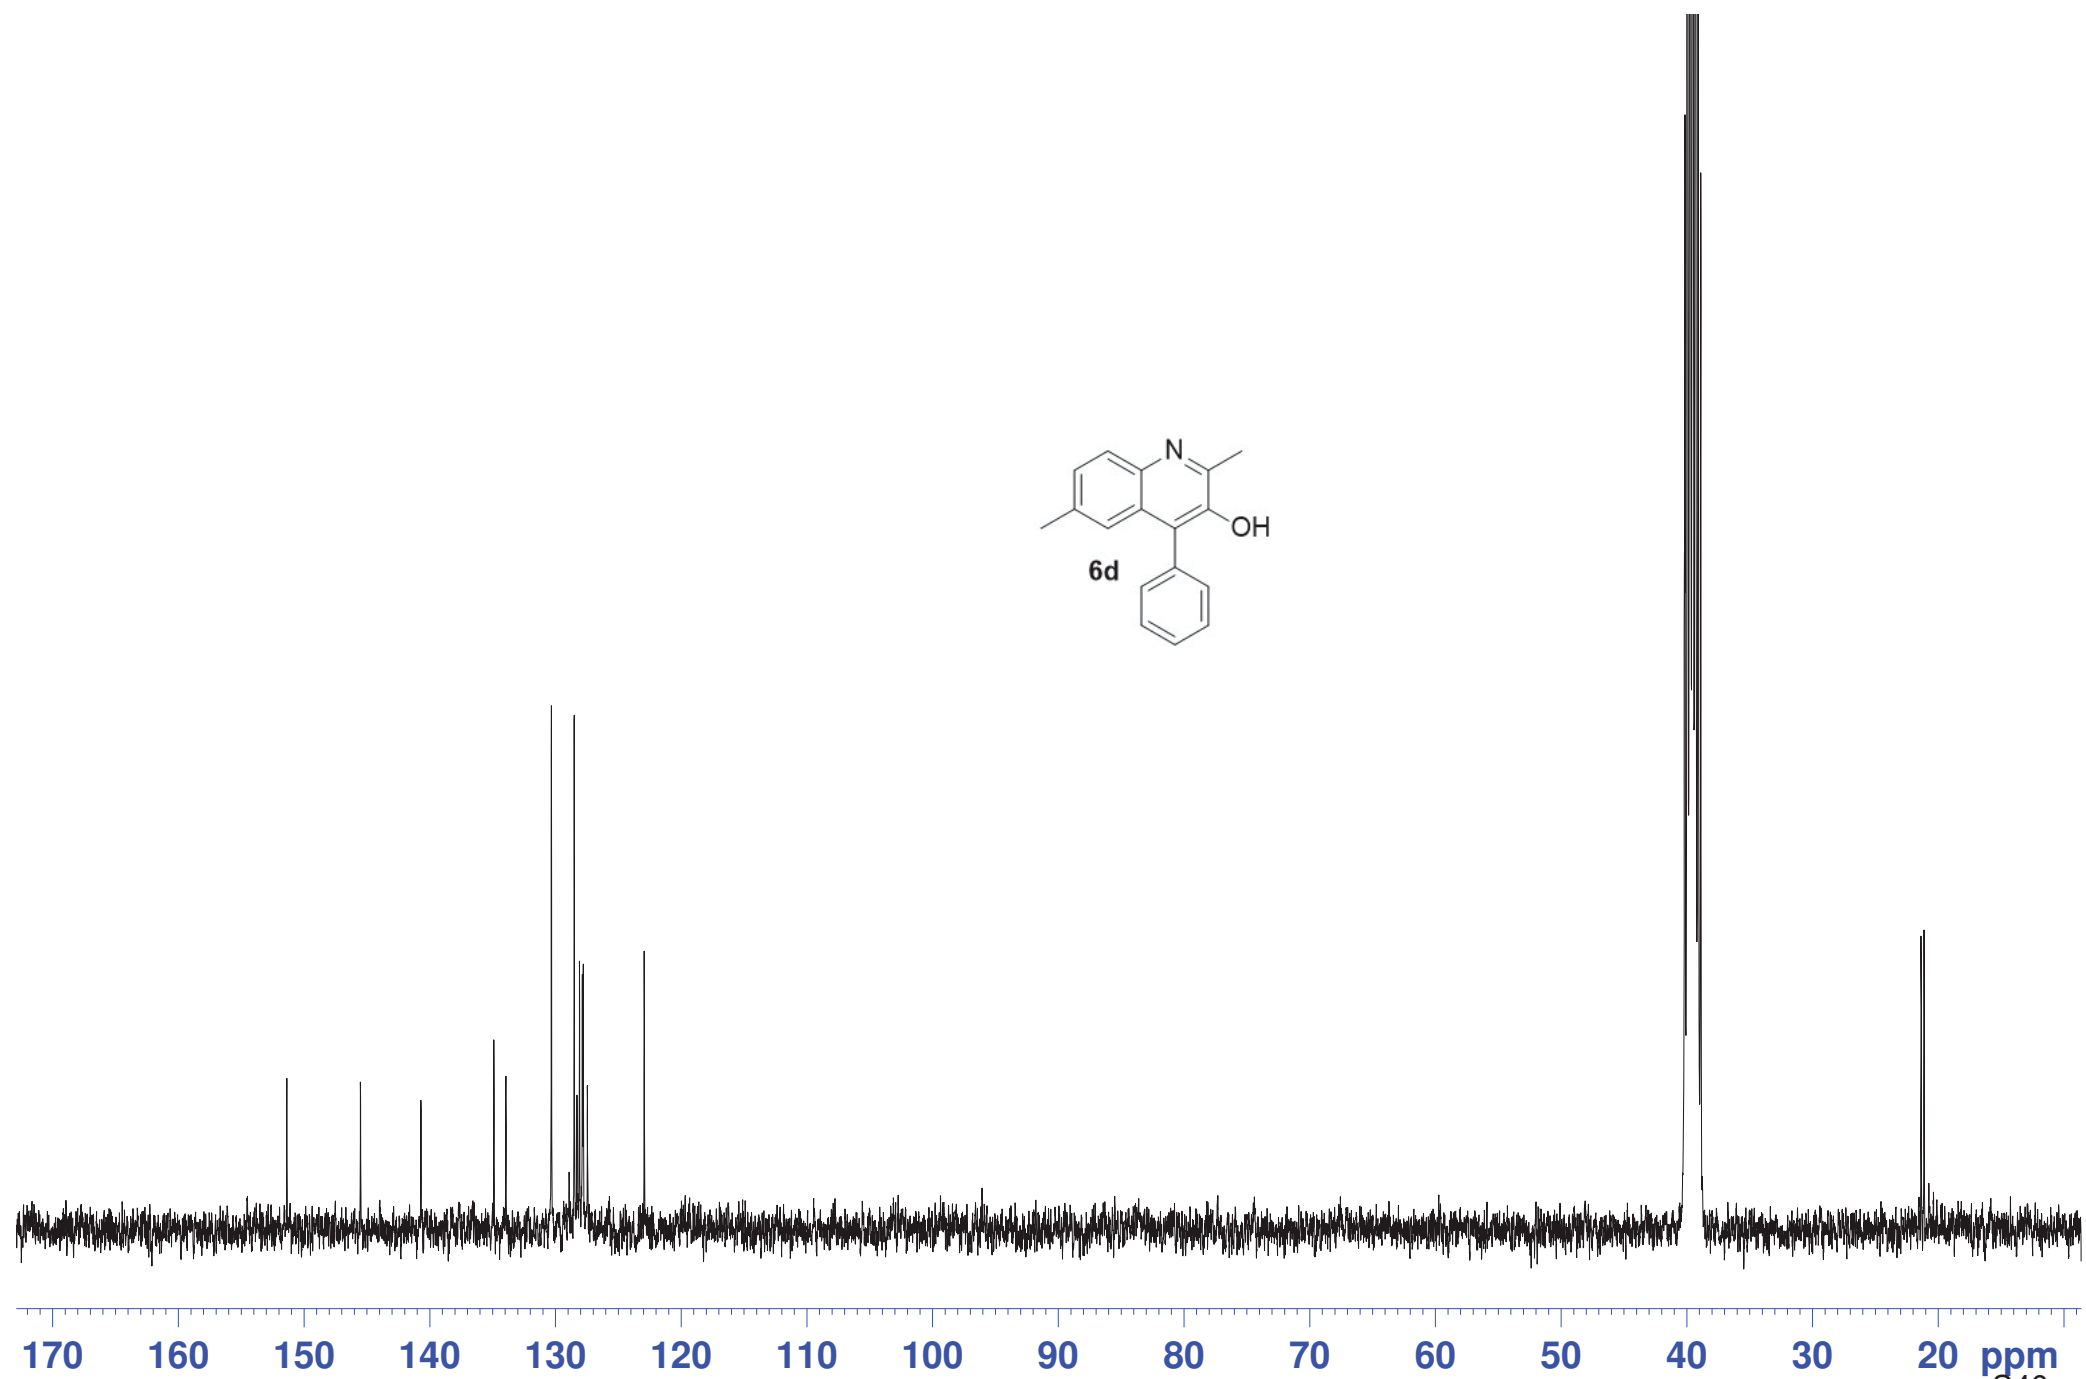

4-tBuPhdiazonium salt, dry MeCN, Styrene, 80deg, 2h, Aq.wkp 2 days rt

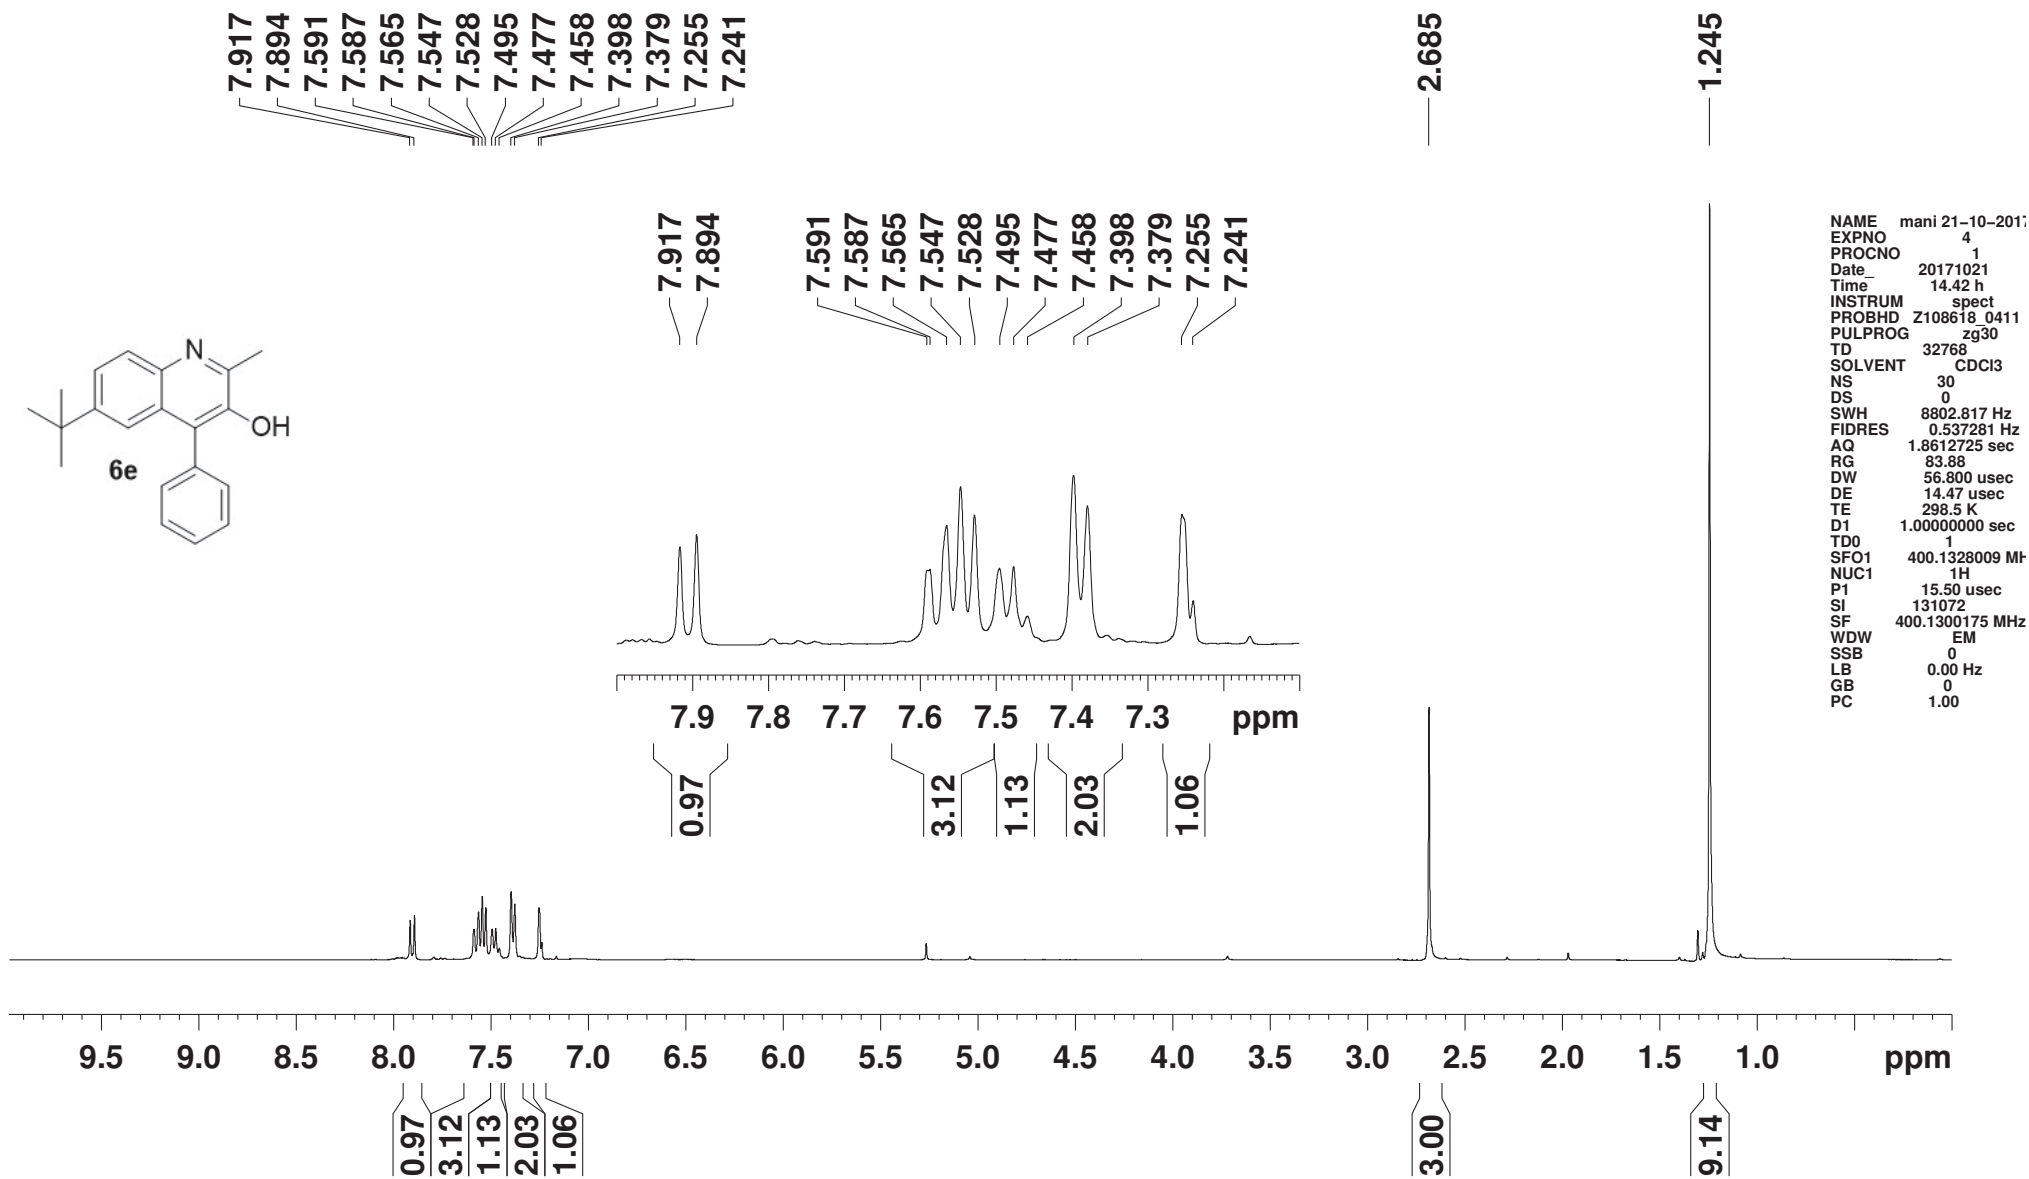

4-tBuPhdiazonium salt, dry MeCN, Styrene, 80deg, 2h, Aq.wkp 2 days rt

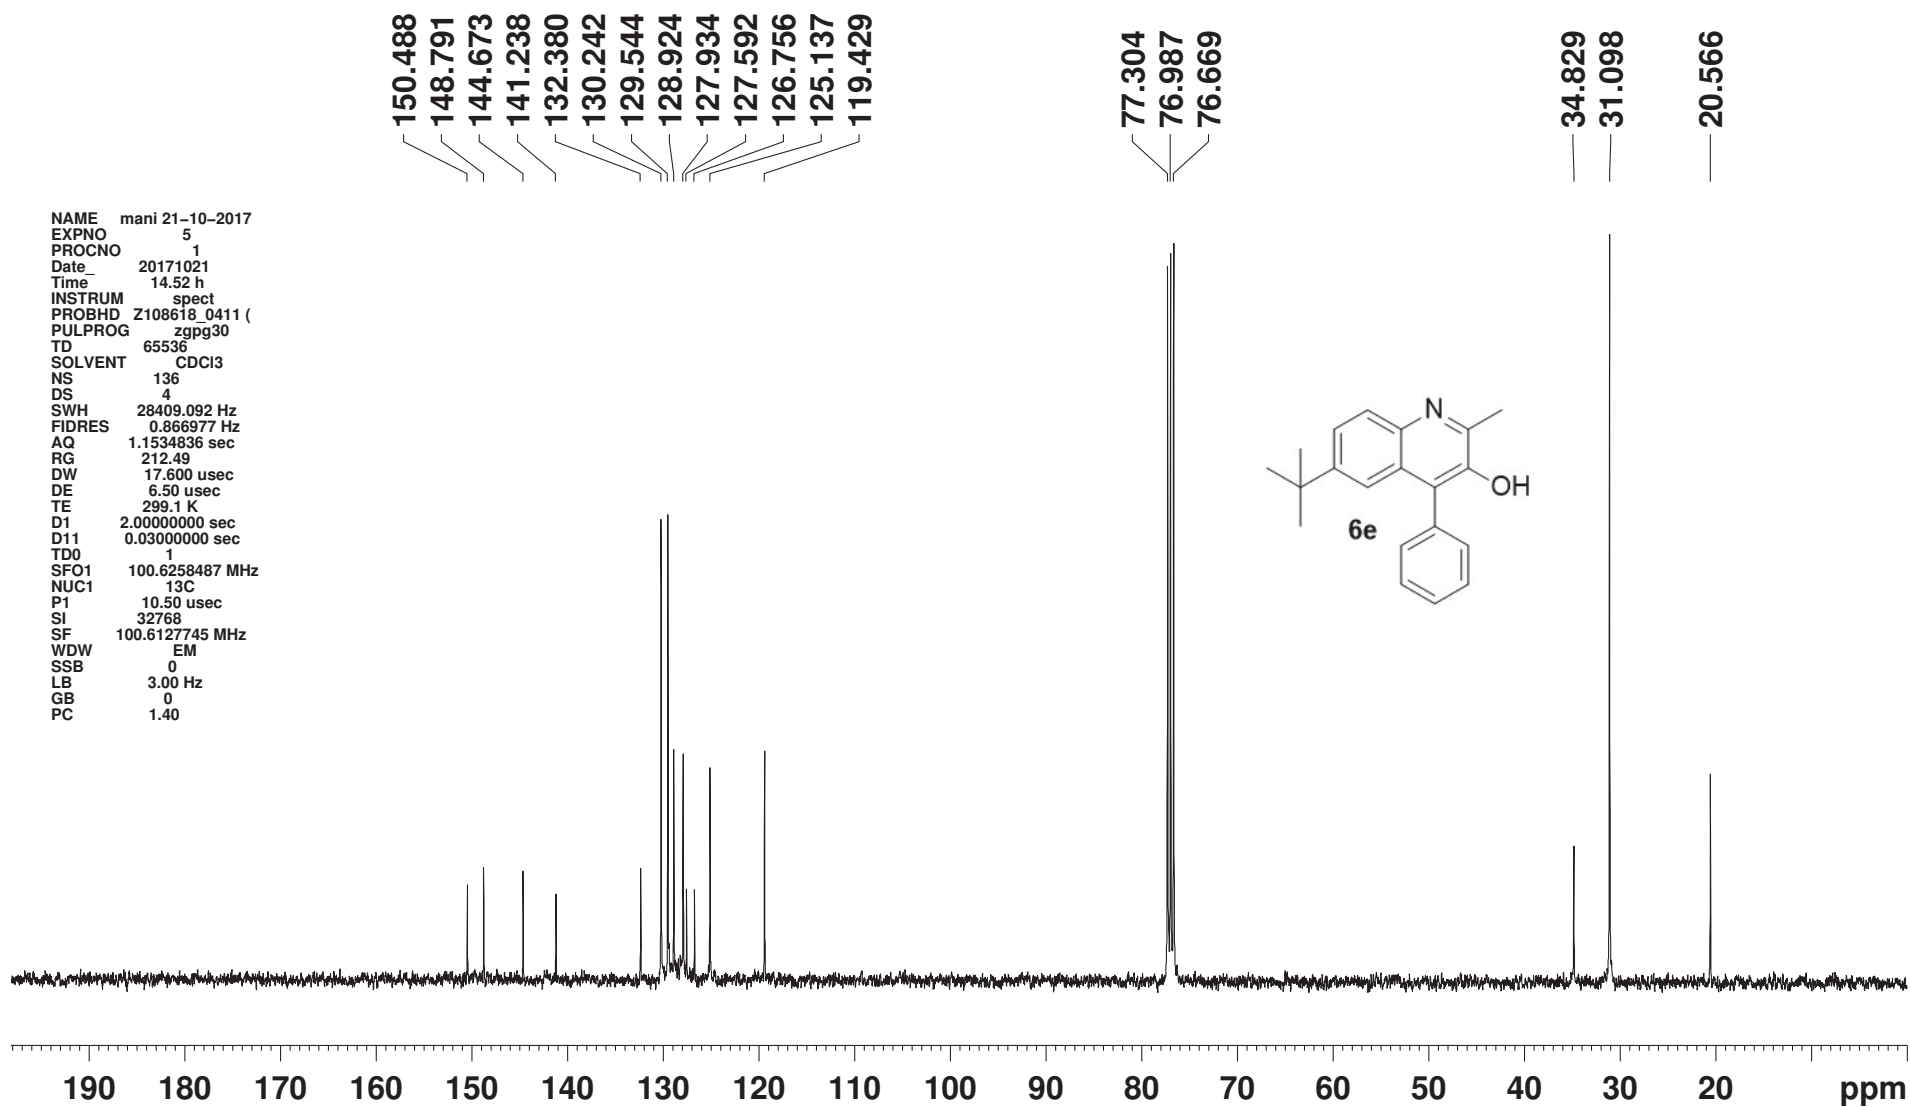

Phdiazonium salt, dry BuCN, Styrene, 80deg, 2h, Aq.wkp 3 days rt

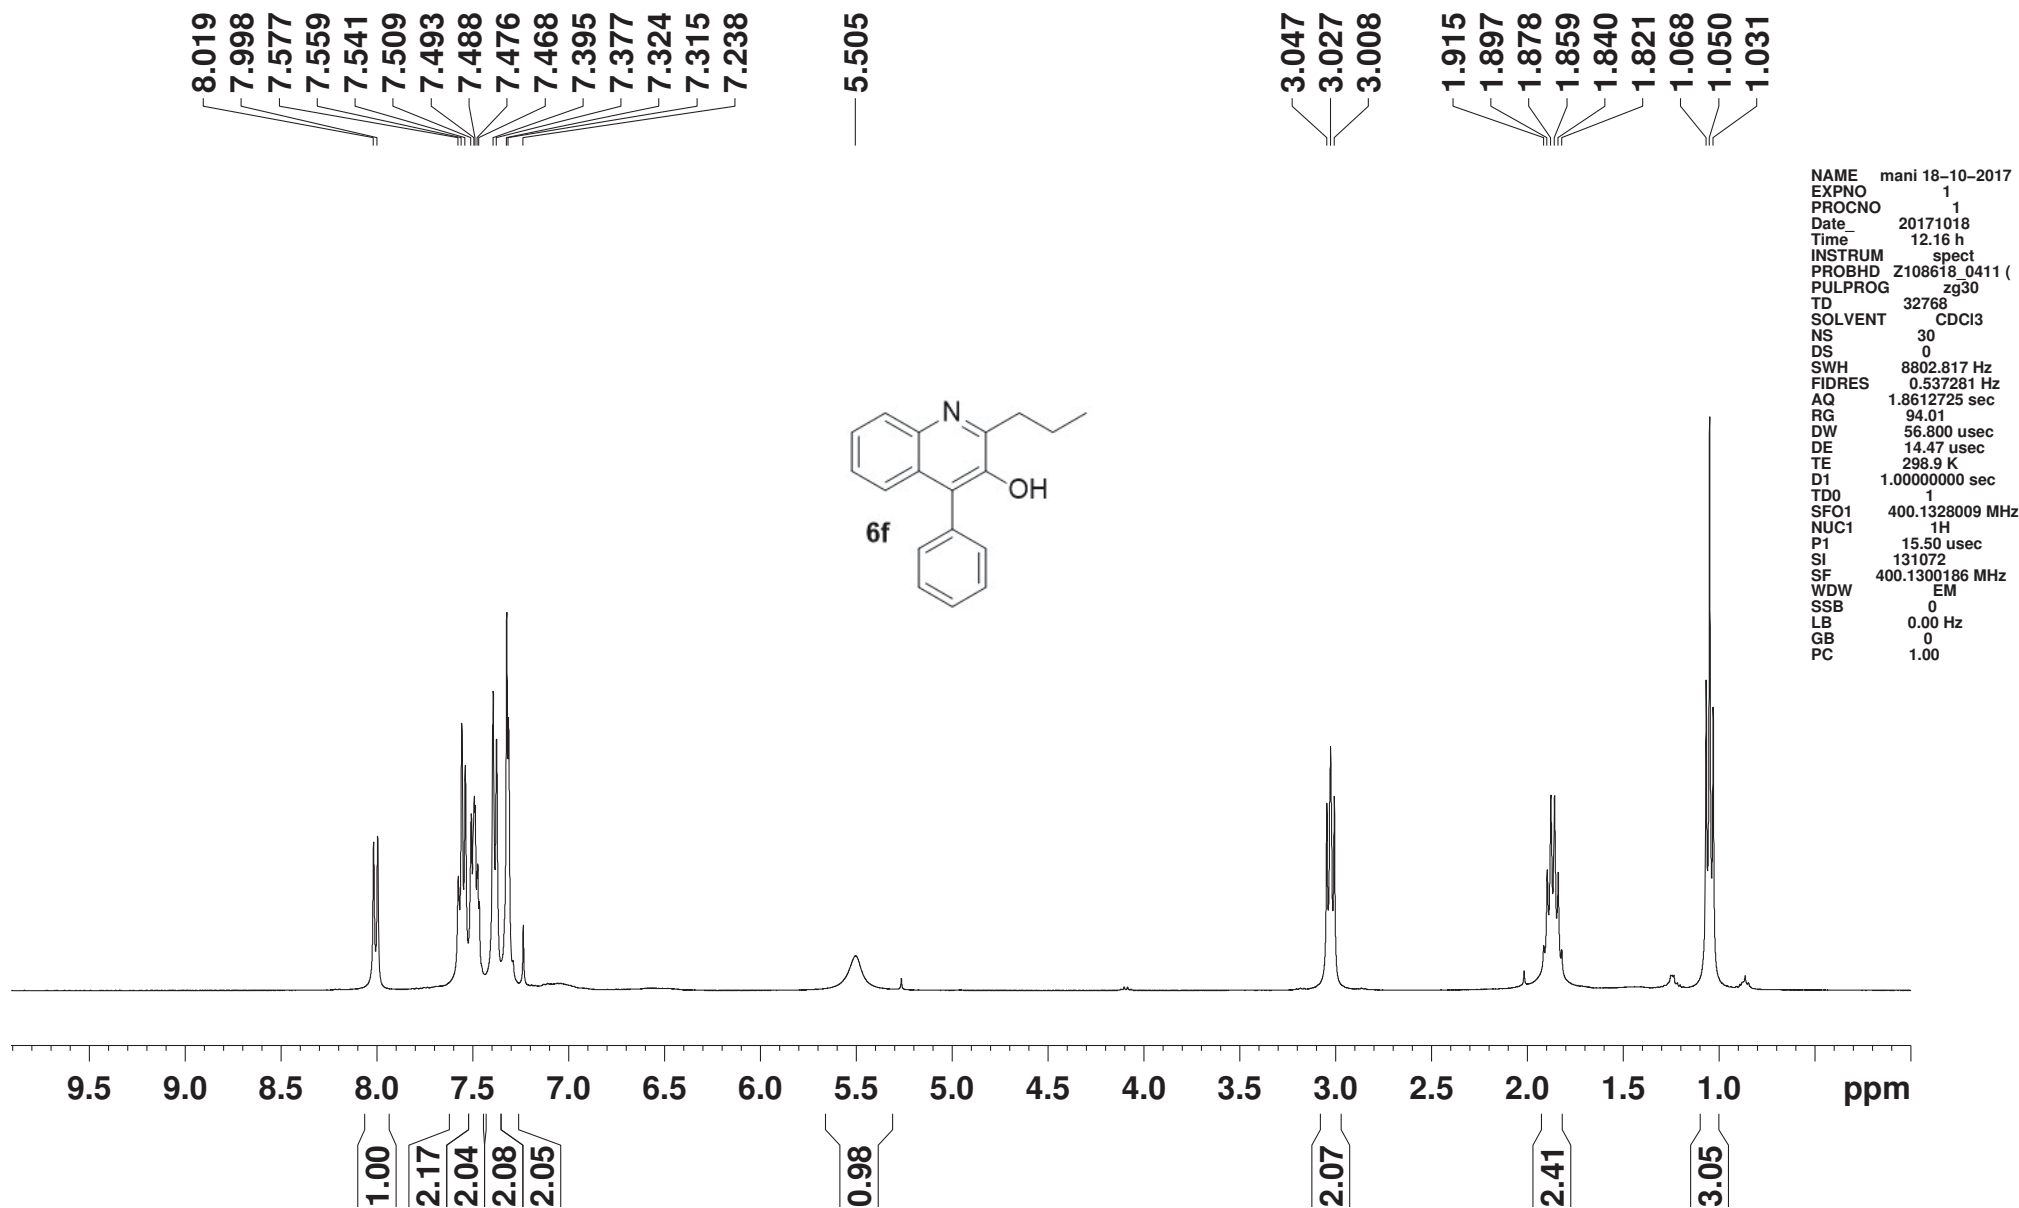

Phdiazonium salt, dry BuCN, Styrene, 80deg, 2h, Aq.wkp 3 days rt

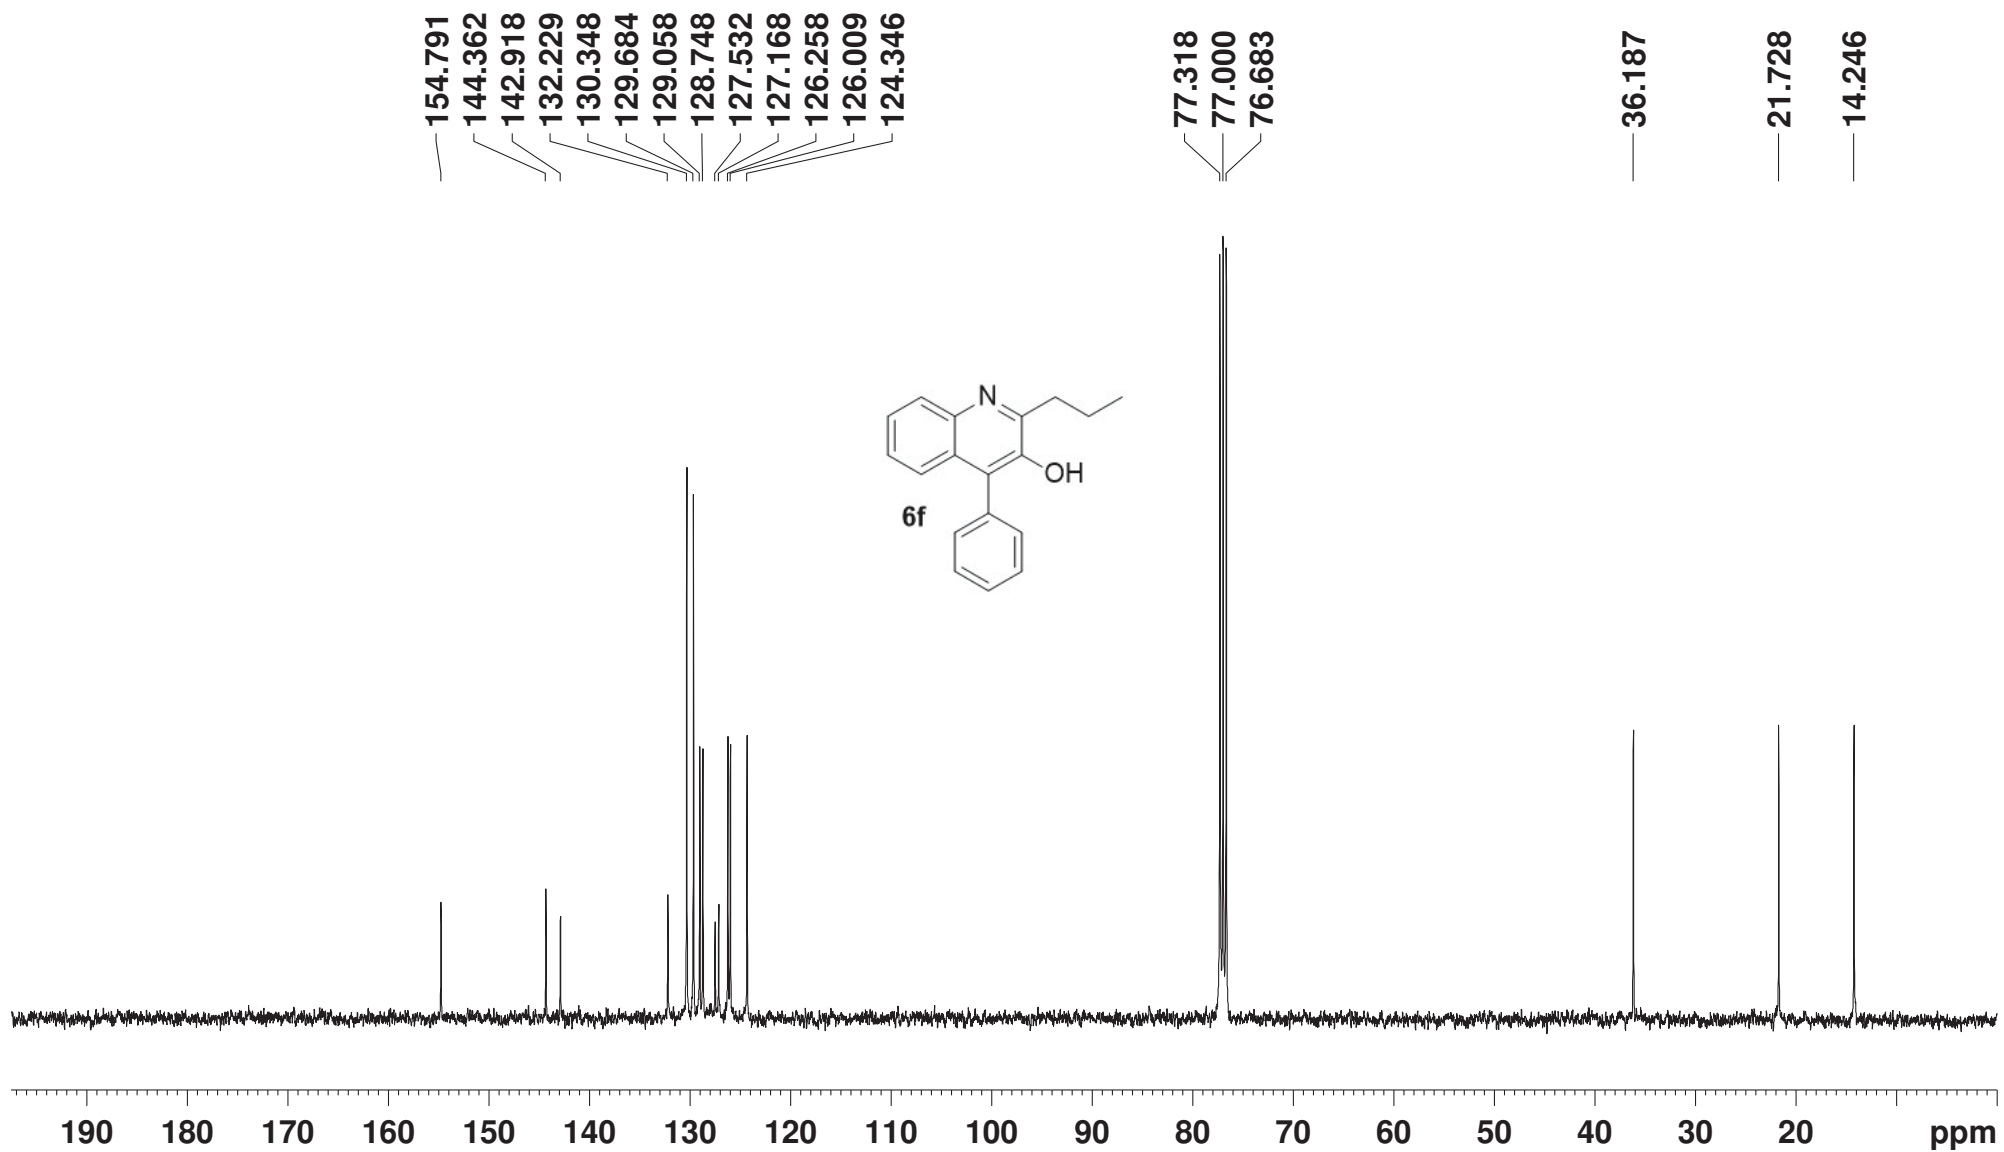

Phdiazonium salt, dry iBuCN, Styrene, 80deg, 2h, aq.wkp, rt, 3days

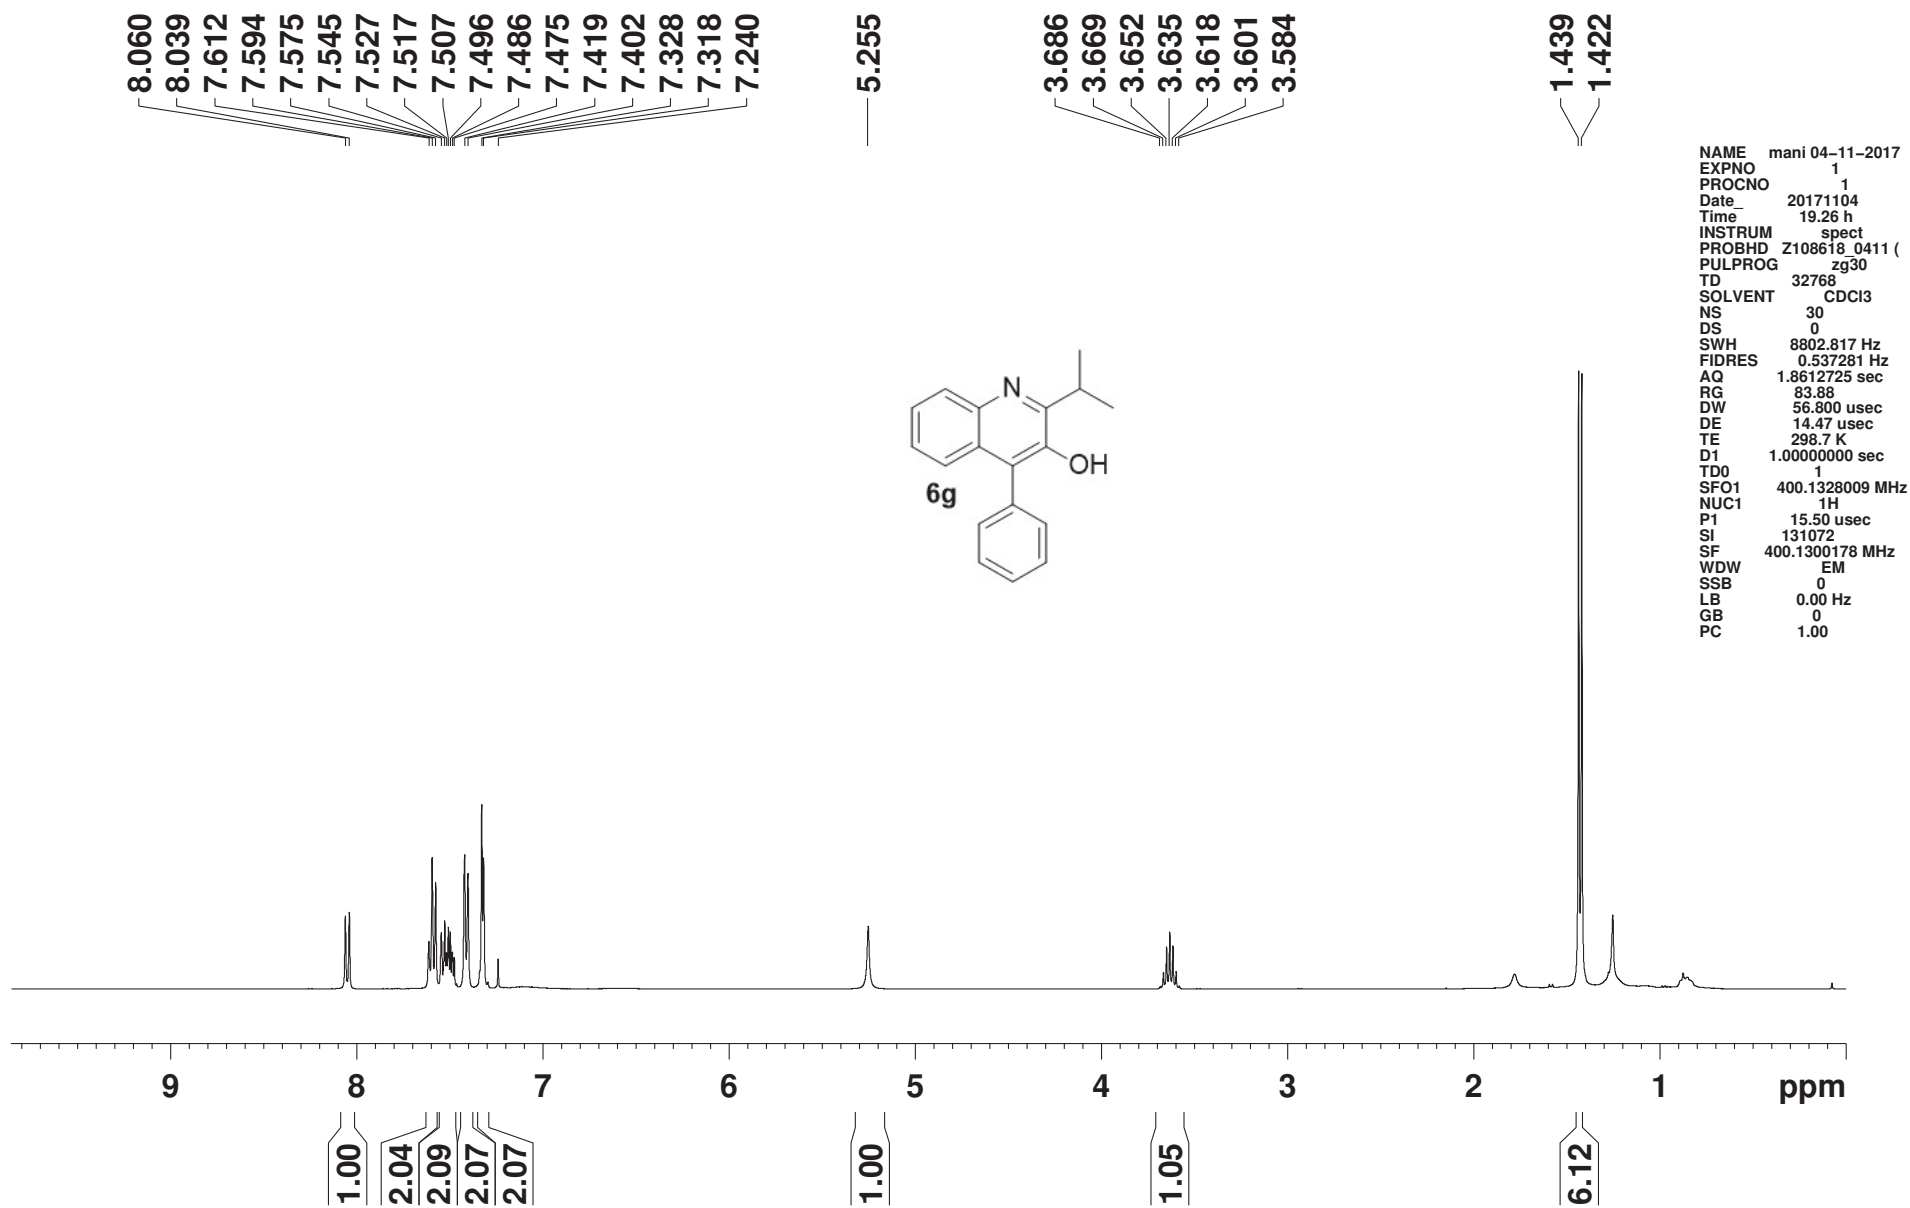

Phdiazonium salt, dry iBuCN, Styrene, 80deg, 2h, aq.wkp, rt, 3days

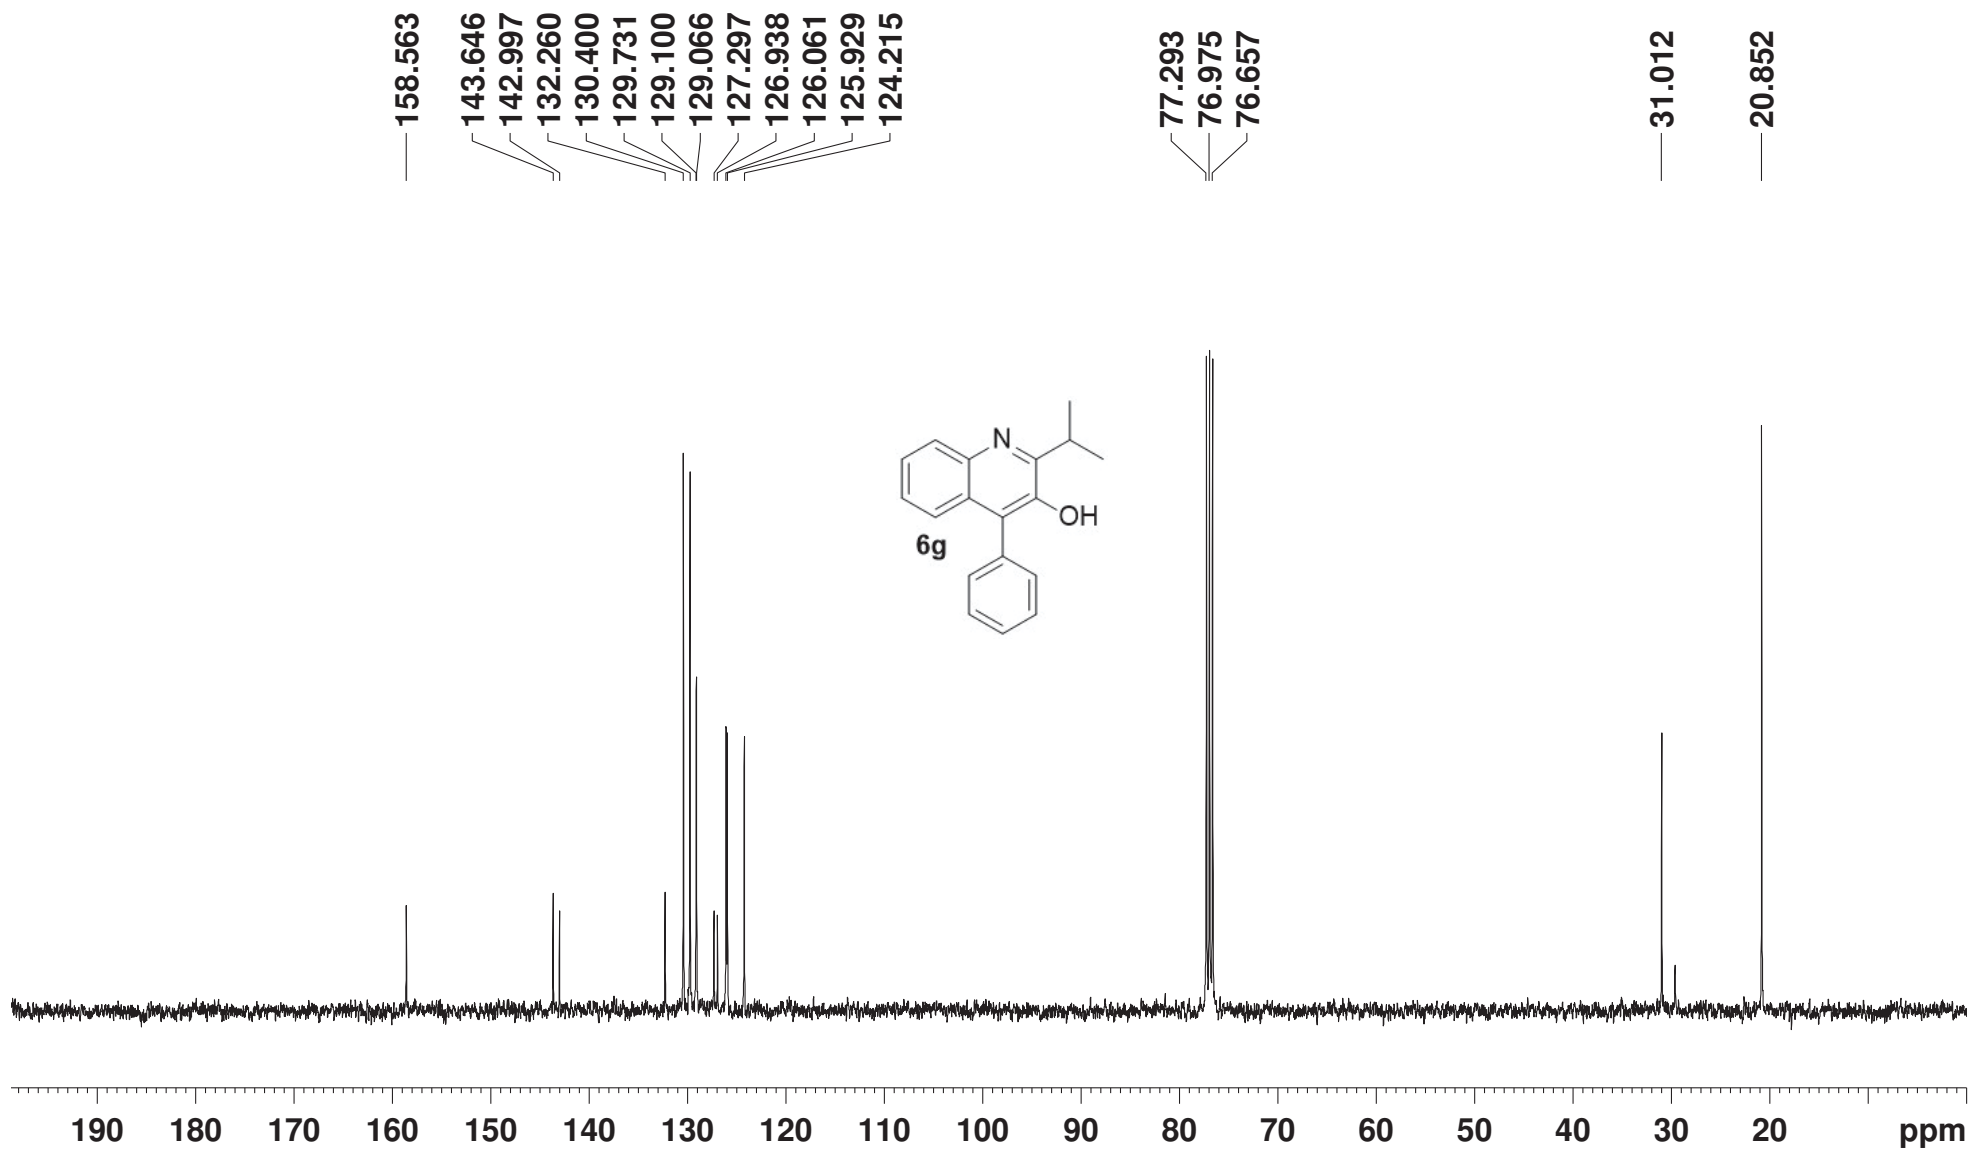

nitrazolium salt, dry cycCN, styrene, 00deg, 211, aq.wkr, 10, 3days

7.960  
7.605  
7.588  
7.569  
7.540  
7.522  
7.515  
7.504  
7.489  
7.483  
7.475  
7.468  
7.462  
7.453  
7.447  
7.416  
7.413  
7.396  
7.319  
7.302  
7.299  
7.286  
7.265  
7.238  
5.359

2.671  
2.659  
2.650  
2.638  
2.626  
2.618  
2.605  
1.363  
1.357  
1.353  
1.251  
1.106  
1.098  
1.091  
1.077  
1.070  
1.061

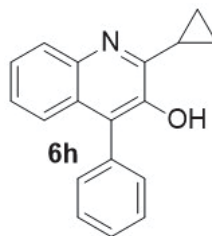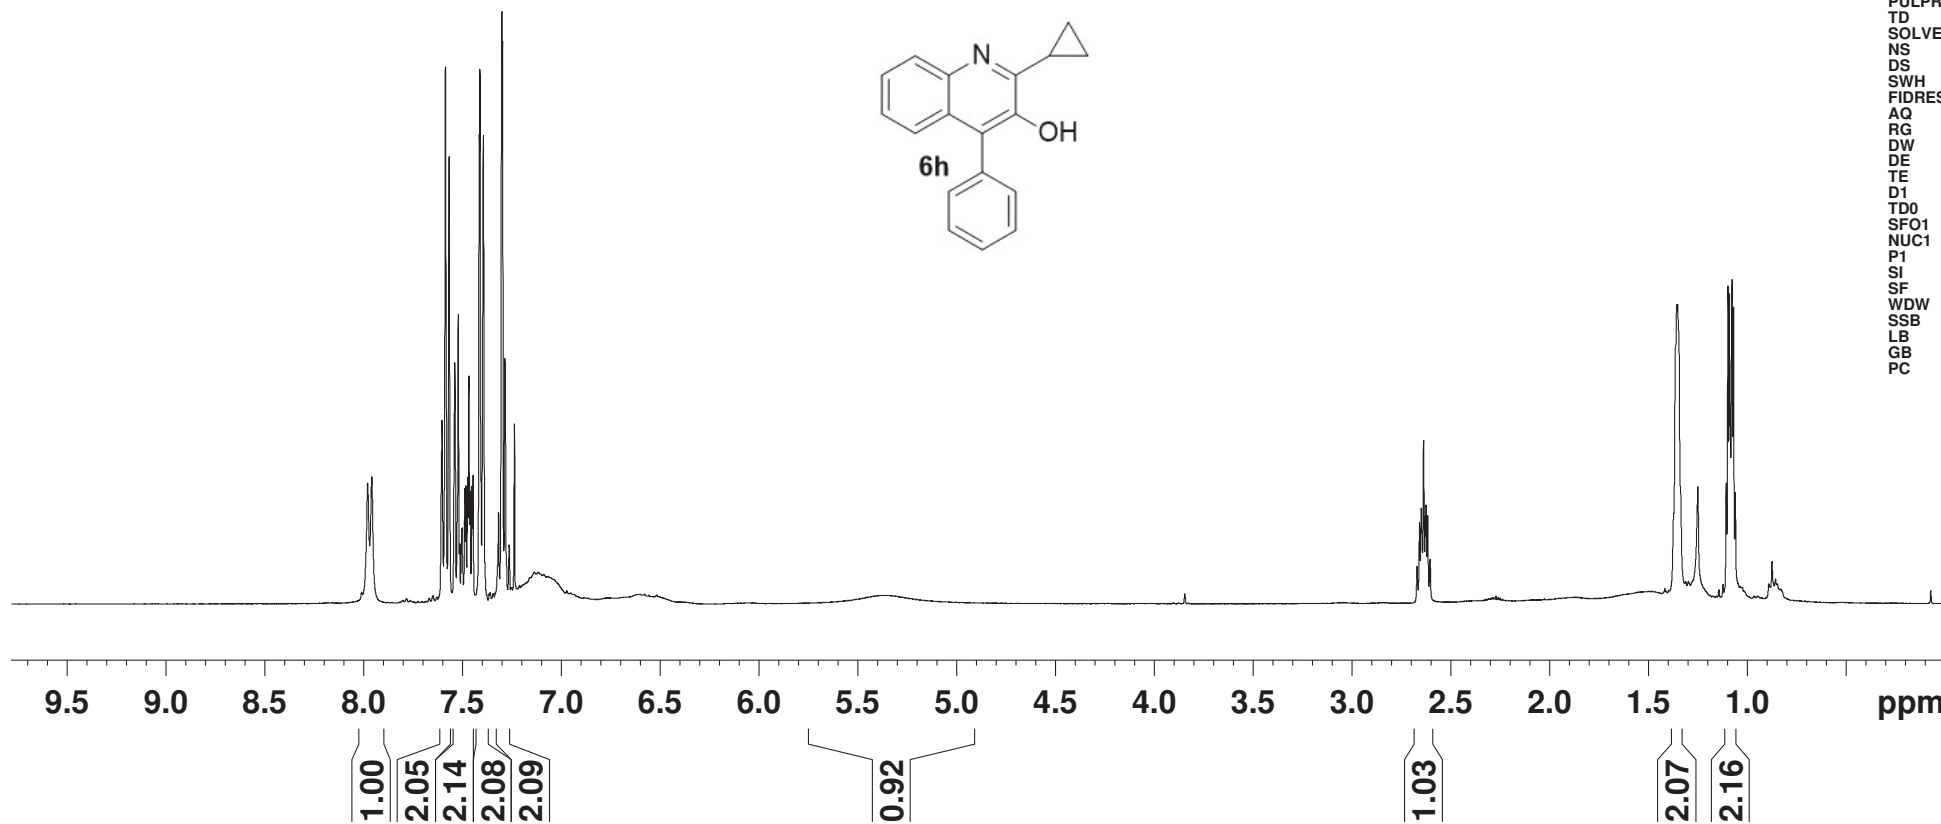

```

NAME mani 07-
EXPNO 2
PROCNO
Date_ 201711
Time 11.35
INSTRUM sp
PROBHD Z10861
PULPROG z
TD 32768
SOLVENT CI
NS 30
DS 0
SWH 8802.8
FIDRES 0.537
AQ 1.86127
RG 103.36
DW 56.800
DE 14.47
TE 298.9
D1 1.000000
TD0 1
SFO1 400.132
NUC1 1H
P1 15.50
SI 131072
SF 400.13001
WDW EM
SSB 0
LB 0.00
GB 0
PC 1.00
    
```



Pyridazolinium salt, dry cycCN, styrene, 80deg, Zn, aq.wkp, rt, 5days

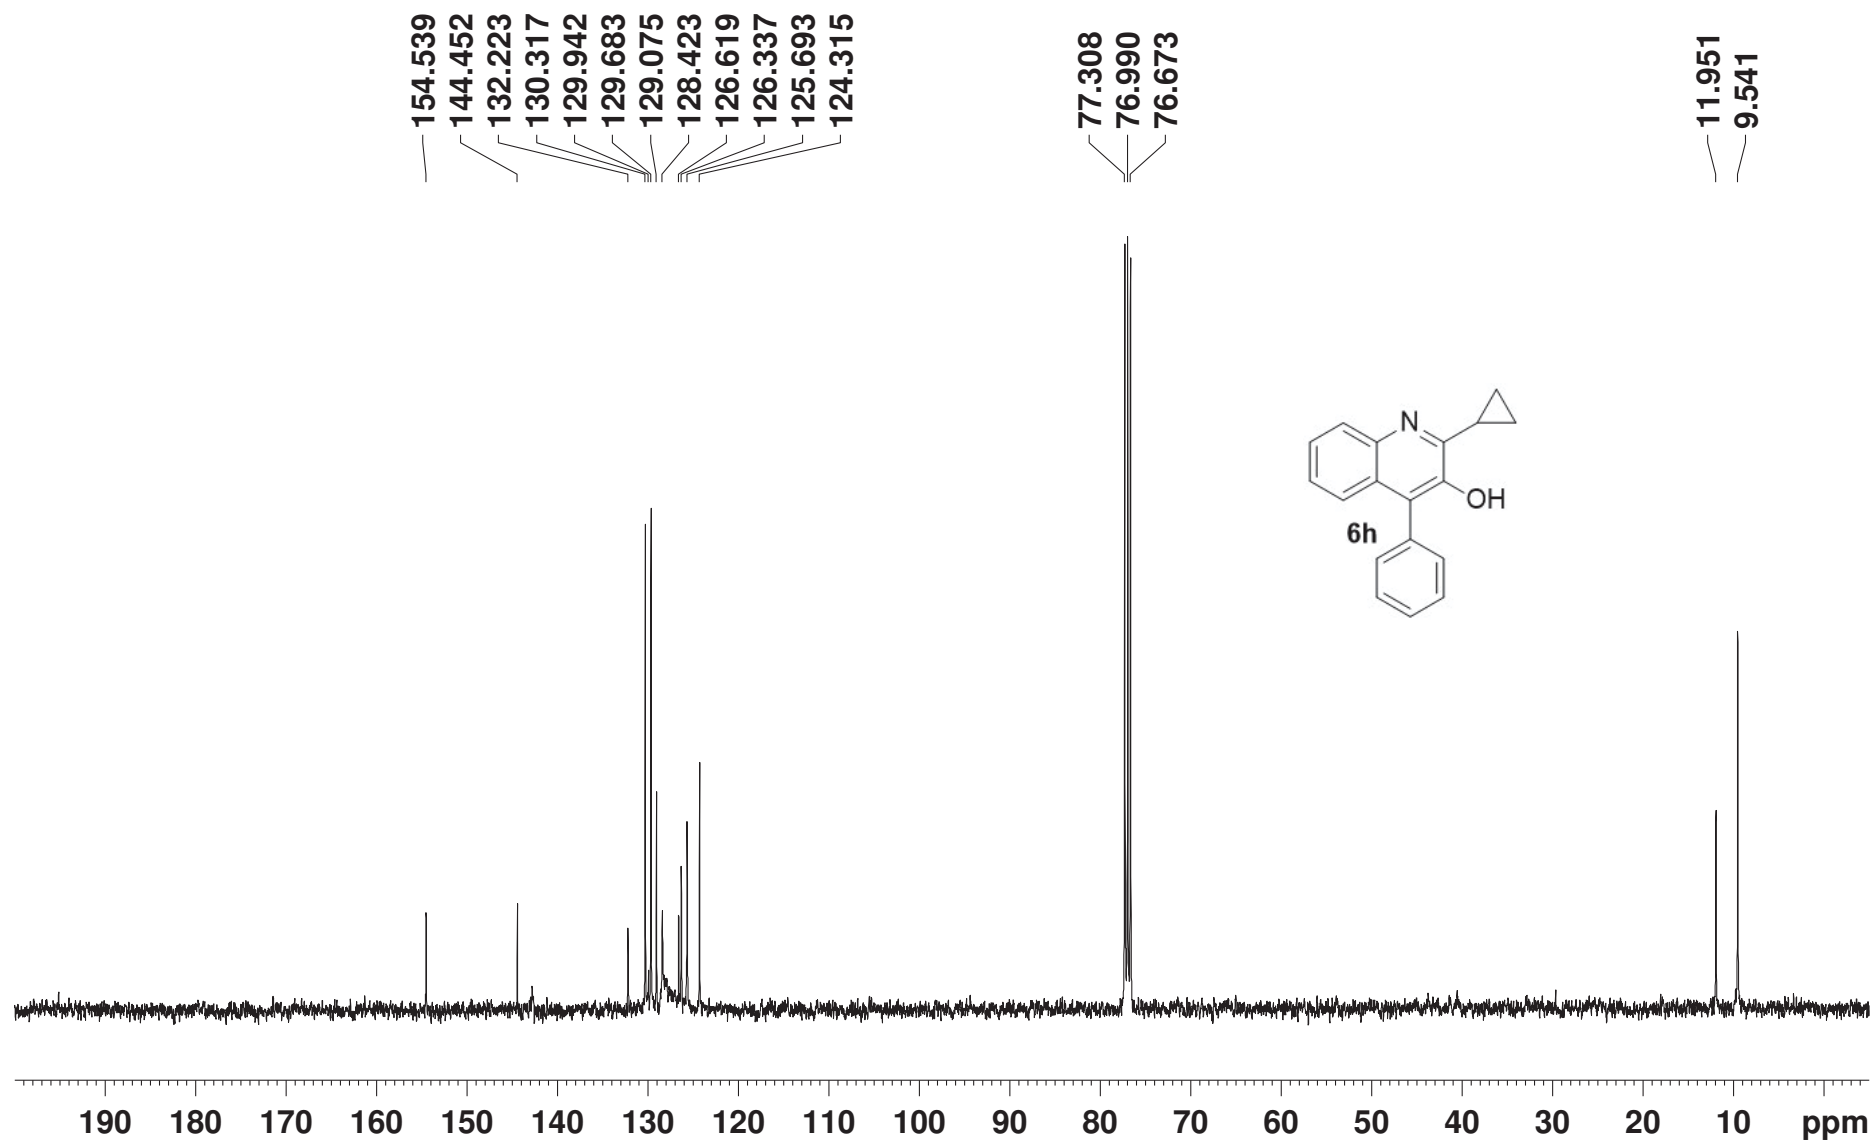

Phdiazonium salt, dry MeCN, 1-octene, 80deg, 2h, aq.wkp, rt, 3days

8.012  
7.992  
7.855  
7.835  
7.832  
7.519  
7.504  
7.502  
7.481  
7.461  
7.445  
7.239

4.942

3.049  
3.029  
3.009  
2.674  
1.661  
1.643  
1.623  
1.615  
1.604  
1.583  
1.439  
1.421  
1.404  
1.385  
1.367  
1.285  
1.276  
1.267  
1.258  
1.250  
1.243  
1.236  
0.858  
0.841

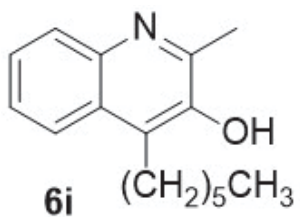

NAME mani 13-11-2017  
EXPNO 2  
PROCNO 1  
Date\_ 20171113  
Time 11.12 h  
INSTRUM spect  
PROBHD Z108618.0411 ( )  
PULPROG zg30  
TD 32768  
SOLVENT CDCl3  
NS 30  
DS 0  
SWH 8802.817 Hz  
FIDRES 0.537281 Hz  
AQ 1.8612725 sec  
RG 165.3  
DW 56.800 usec  
DE 14.47 usec  
TE 296.7 K  
D1 1.0000000 sec  
TD0 1  
SFO1 400.1328009 MHz  
NUC1 1H  
P1 15.50 usec  
SI 131072  
SF 400.1300181 MHz  
WDW EM  
SSB 0  
LB 0.00 Hz  
GB 0  
PC 1.00

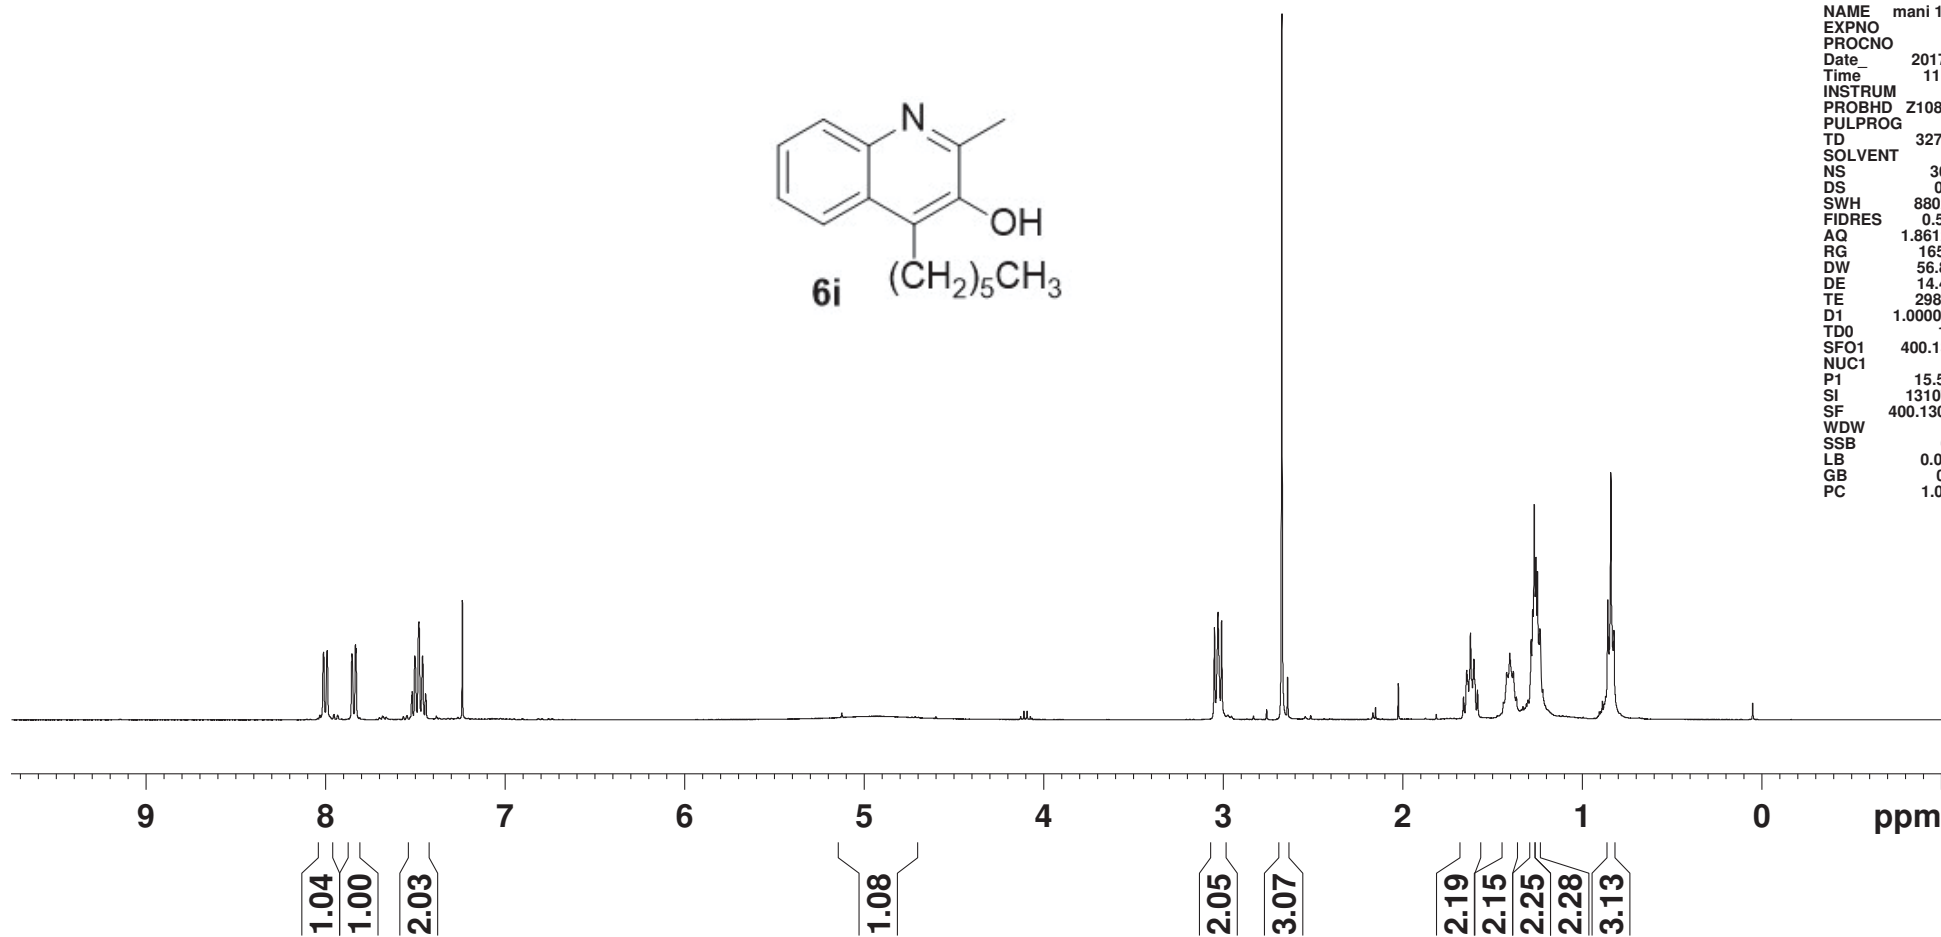

Phdiazonium salt, dry MeCN, 1-octene, 80deg, 2h, aq.wkp, rt, 3days

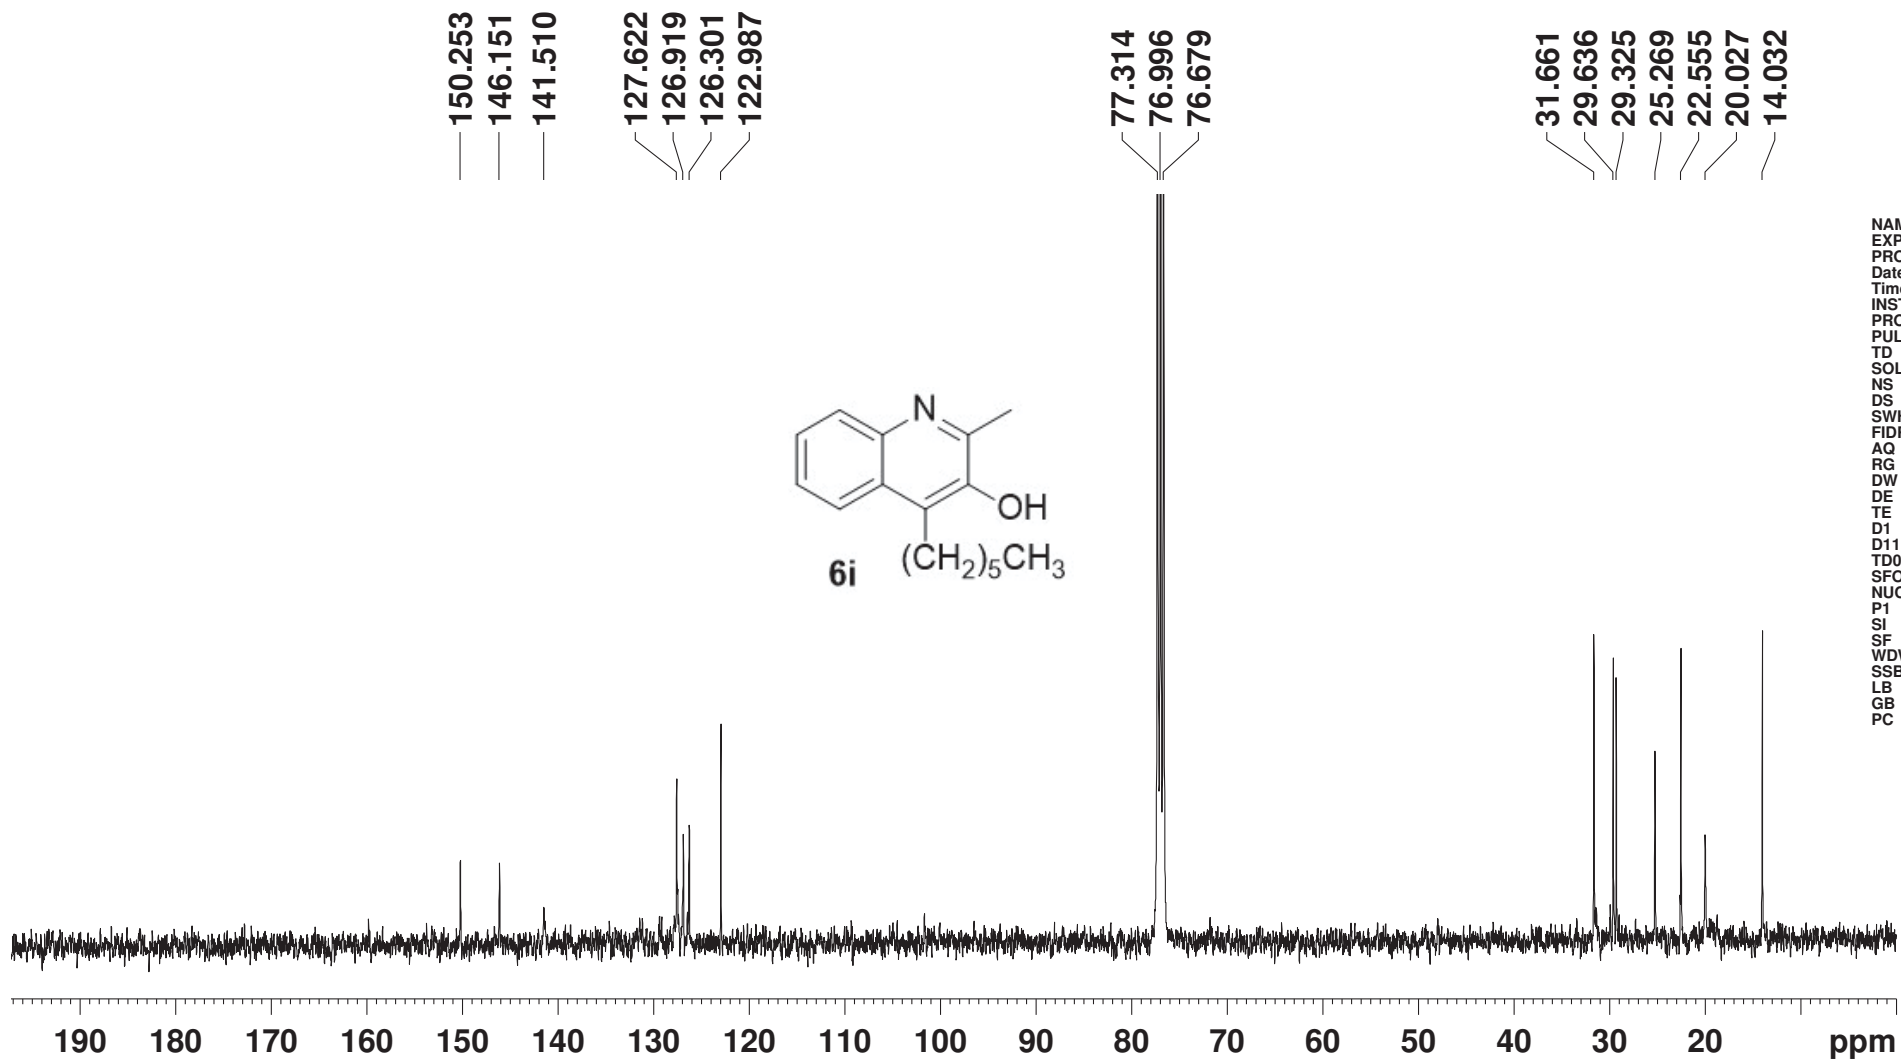

Phdiazonium salt, dry PhCN, Styrene, 80deg, 2h, aq.wkp, rt, 3days bottom spot

8.144  
8.019  
8.015  
8.010  
8.001  
7.997  
7.995  
7.989  
7.626  
7.623  
7.619  
7.610  
7.606  
7.602  
7.590  
7.587  
7.582  
7.579  
7.573  
7.564  
7.558  
7.555  
7.552  
7.543  
7.537  
7.530  
7.526  
7.522  
7.518  
7.514  
7.508  
7.505  
7.493  
7.490  
7.484  
7.472  
7.468  
7.465  
7.455  
7.451  
7.443  
7.435  
7.432  
7.428  
7.426  
7.412  
7.410  
7.407  
7.395  
7.392  
7.385  
7.373  
7.371

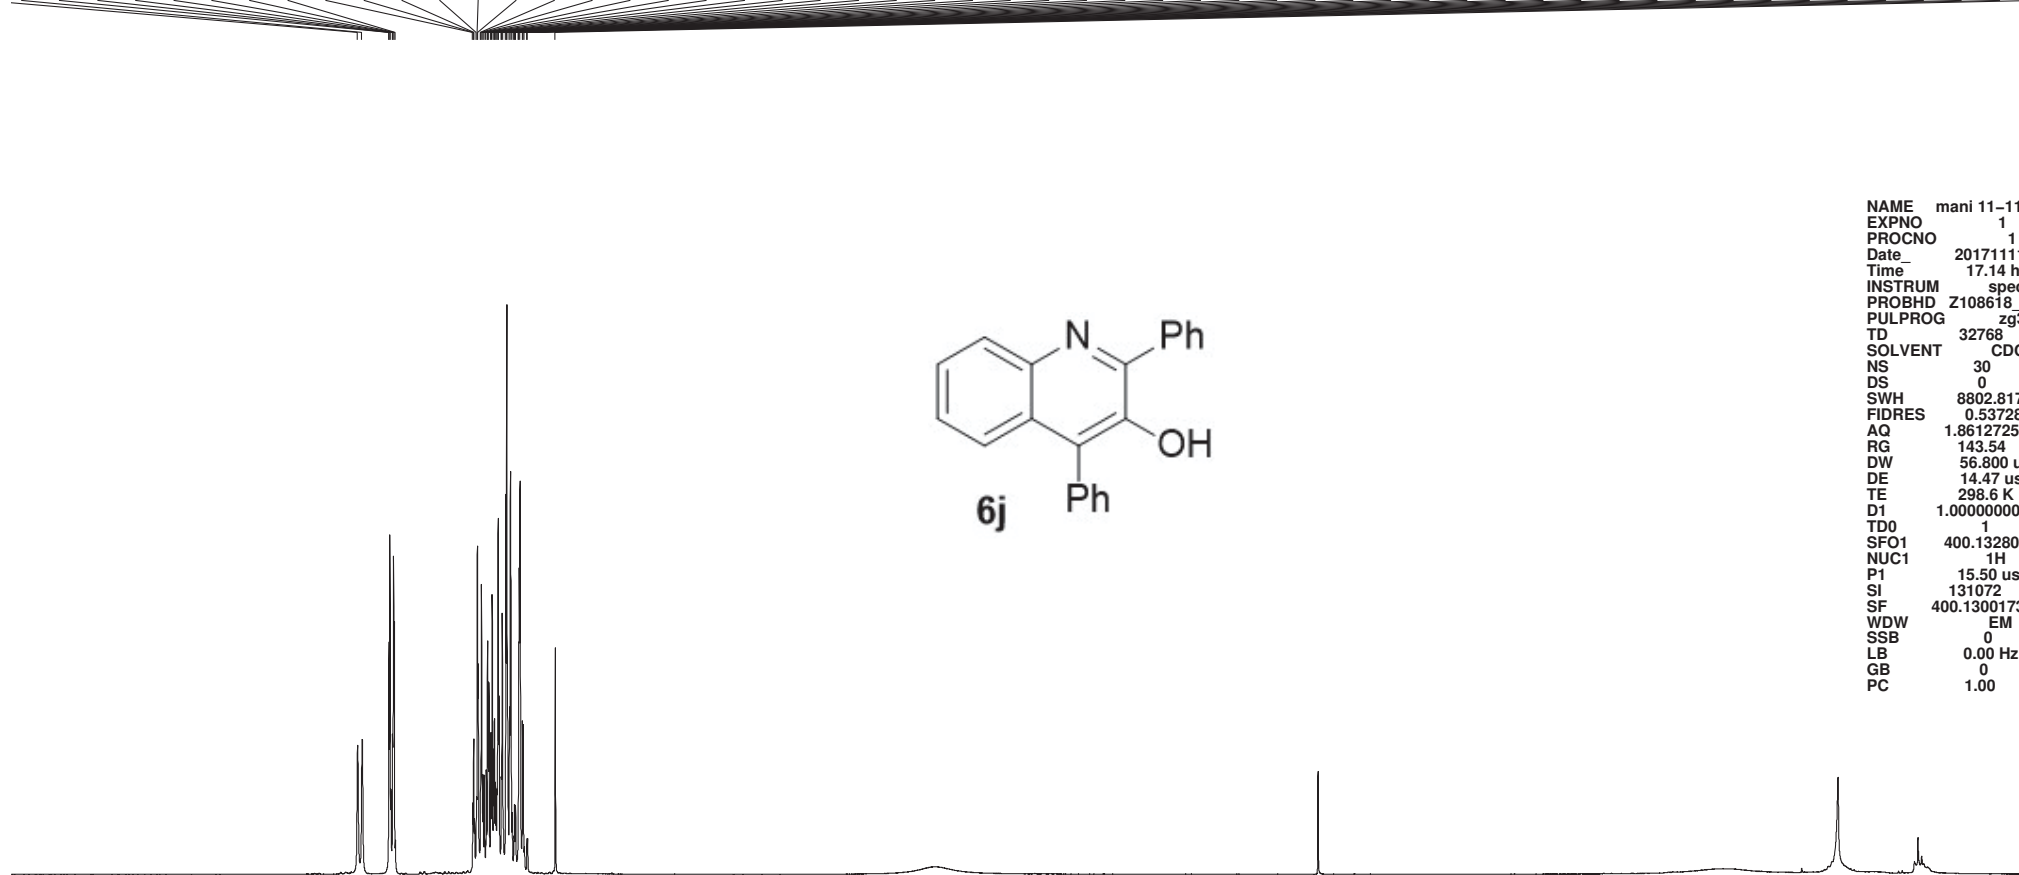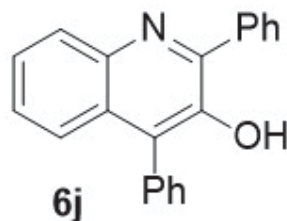

NAME mani 11-11-  
EXPNO 1  
PROCNO 1  
Date\_ 20171111  
Time 17.14 h  
INSTRUM spect  
PROBHD Z108618\_0  
PULPROG zg3i  
TD 32768  
SOLVENT CDCl  
NS 30  
DS 0  
SWH 8802.817  
FIDRES 0.537281  
AQ 1.8612725 s  
RG 143.54  
DW 56.800 usec  
DE 14.47 usec  
TE 298.6 K  
D1 1.0000000 s  
TD0 1  
SFO1 400.132800  
NUC1 1H  
P1 15.50 usec  
SI 131072  
SF 400.1300173  
WDW EM  
SSB 0  
LB 0.00 Hz  
GB 0  
PC 1.00

Phdiazonium salt, dry PhCN, Styrene, 80deg, 2h, aq.wkp, rt, 3days bottom spot

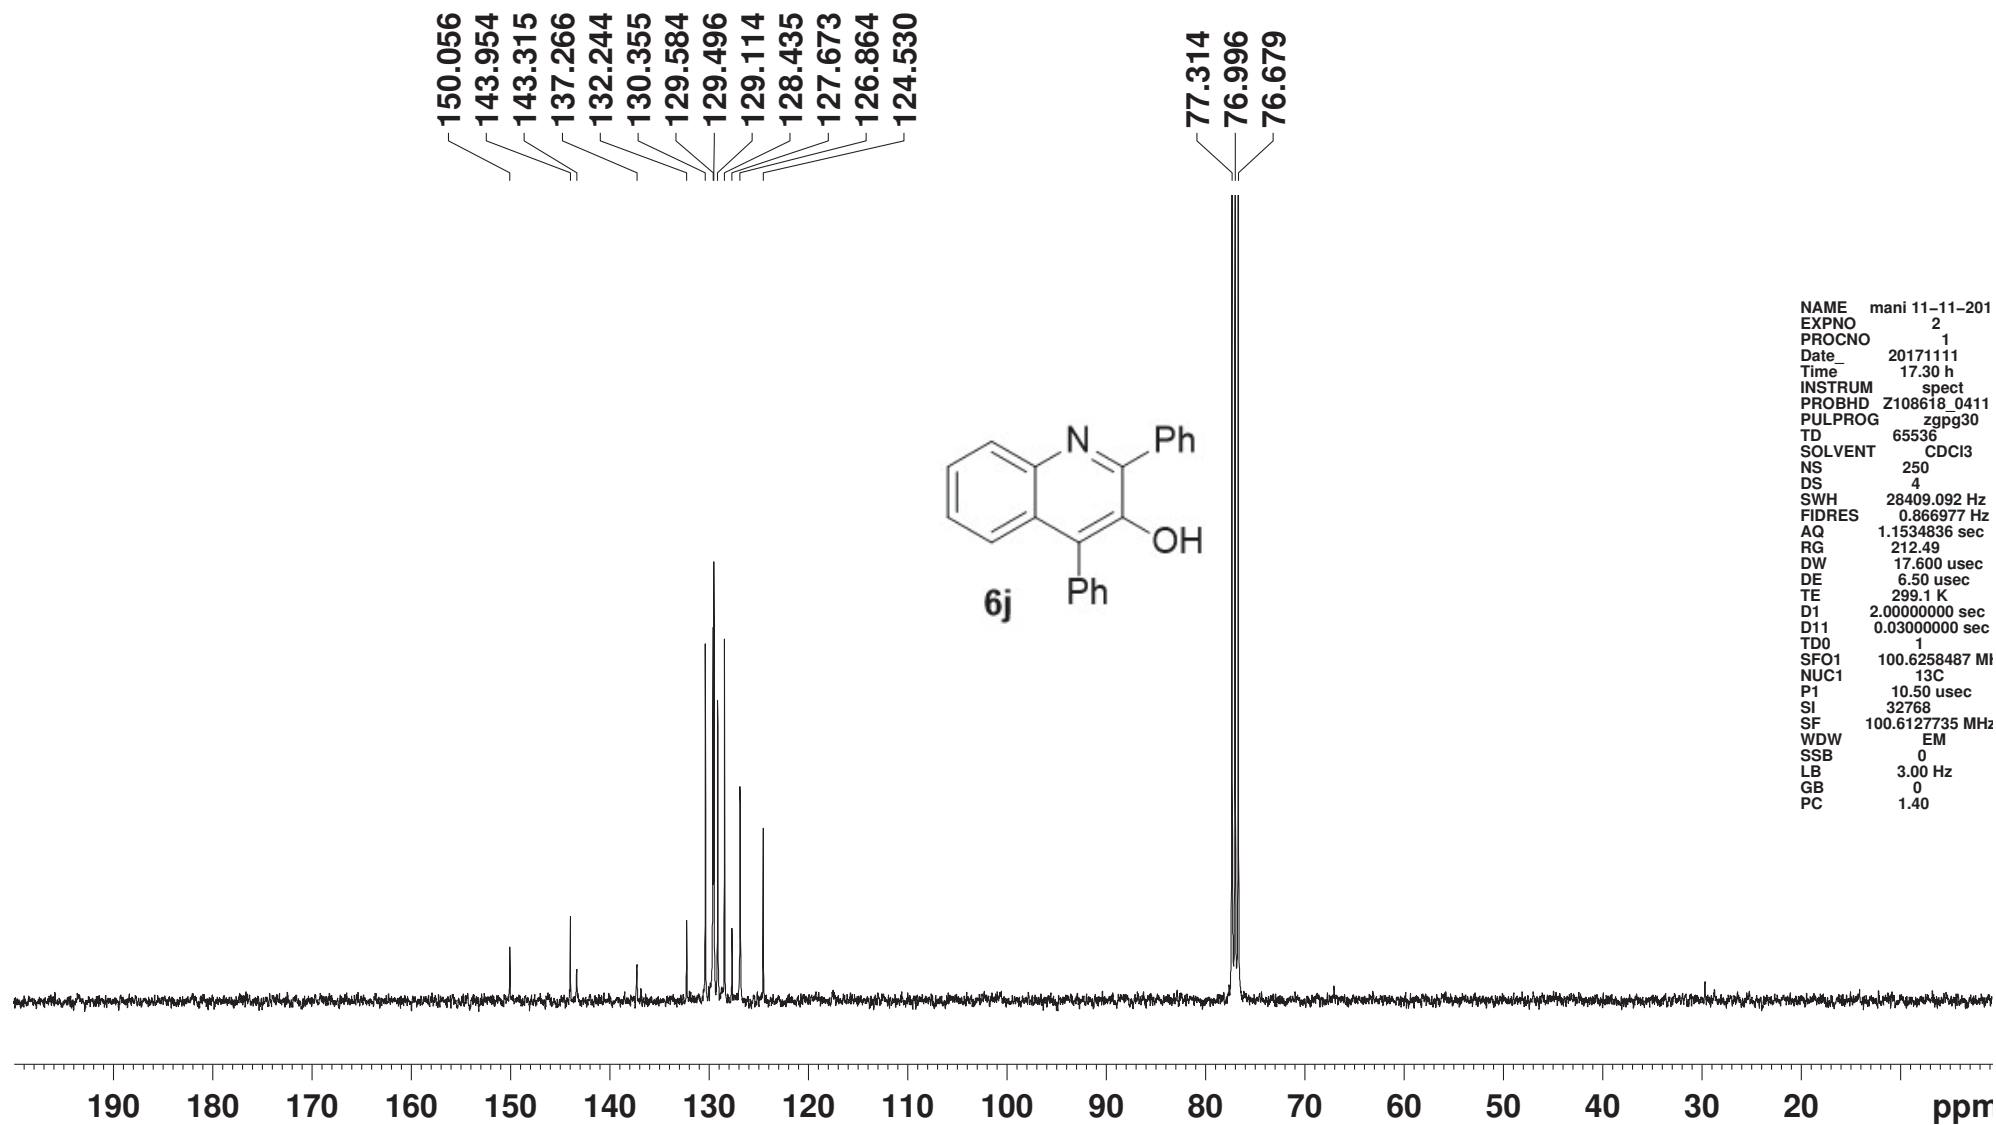

7.609  
7.592  
7.590  
7.458  
7.455  
7.439  
7.436  
7.421  
7.417  
7.372  
7.369  
7.353  
7.351  
7.334  
7.332  
7.289  
7.282  
7.276  
7.258  
7.234  
7.231  
7.033  
7.027  
7.013  
7.009

2.284

1.888

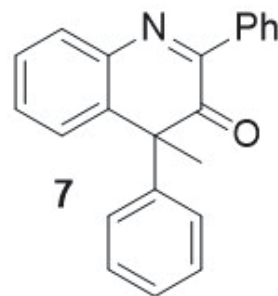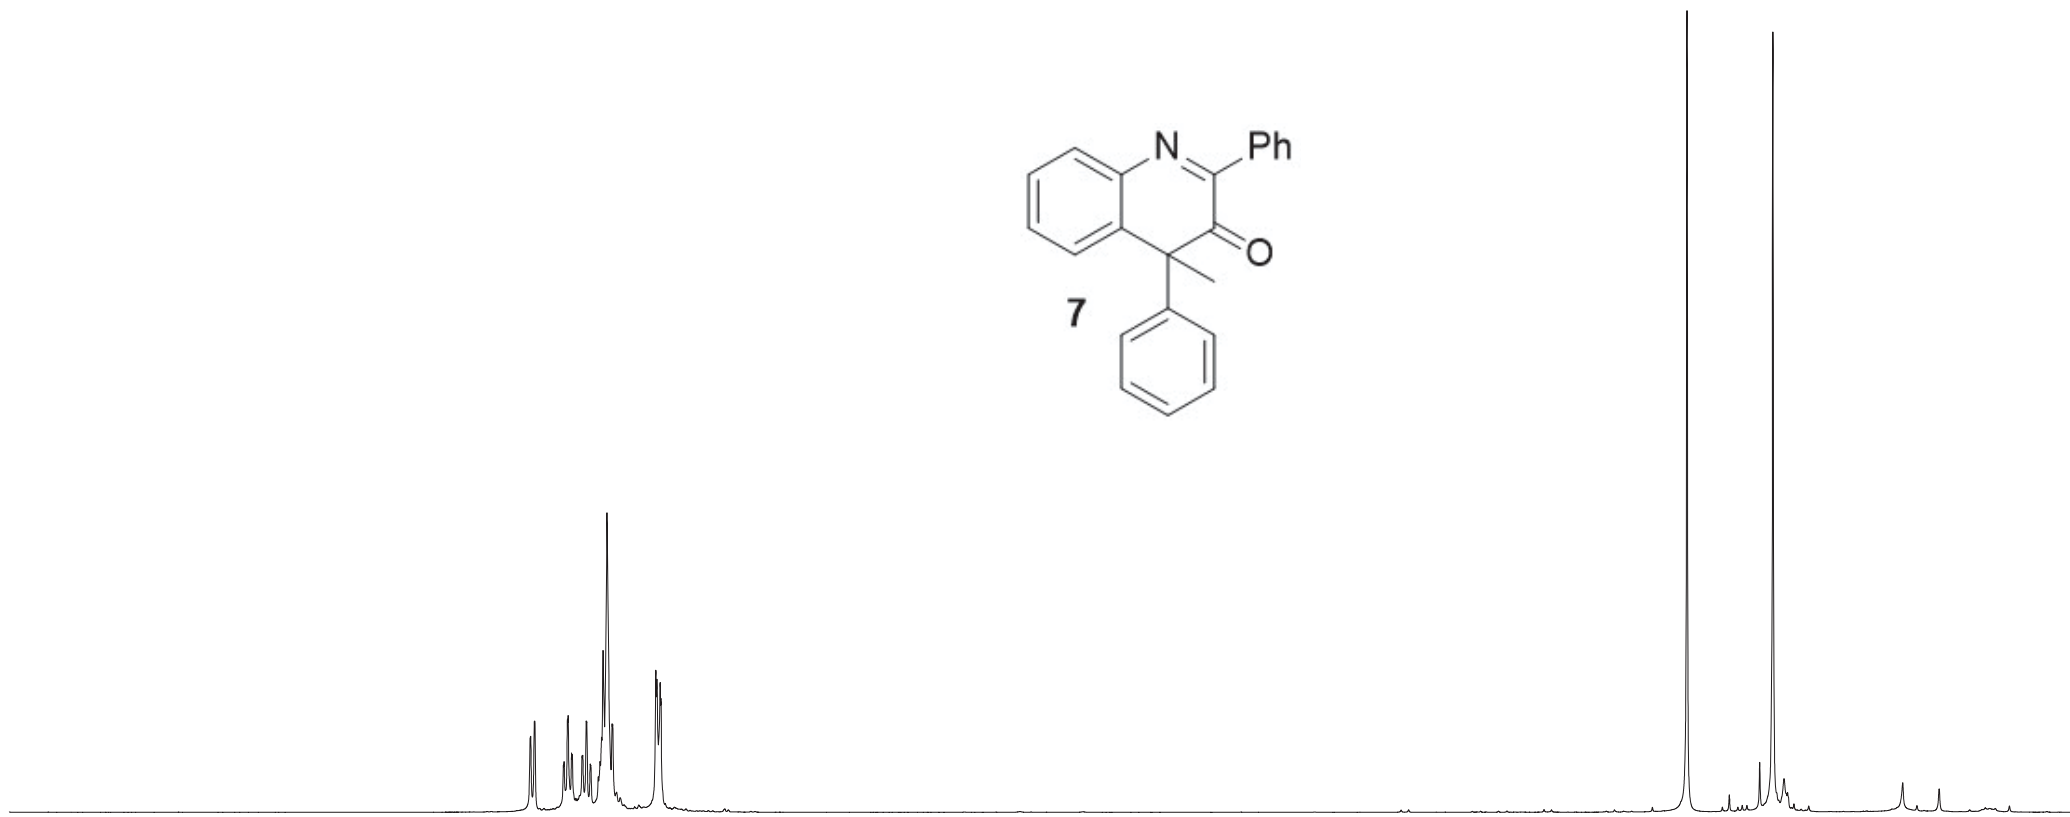

0.93  
1.21  
1.19  
4.36  
2.01

2.91  
3.00

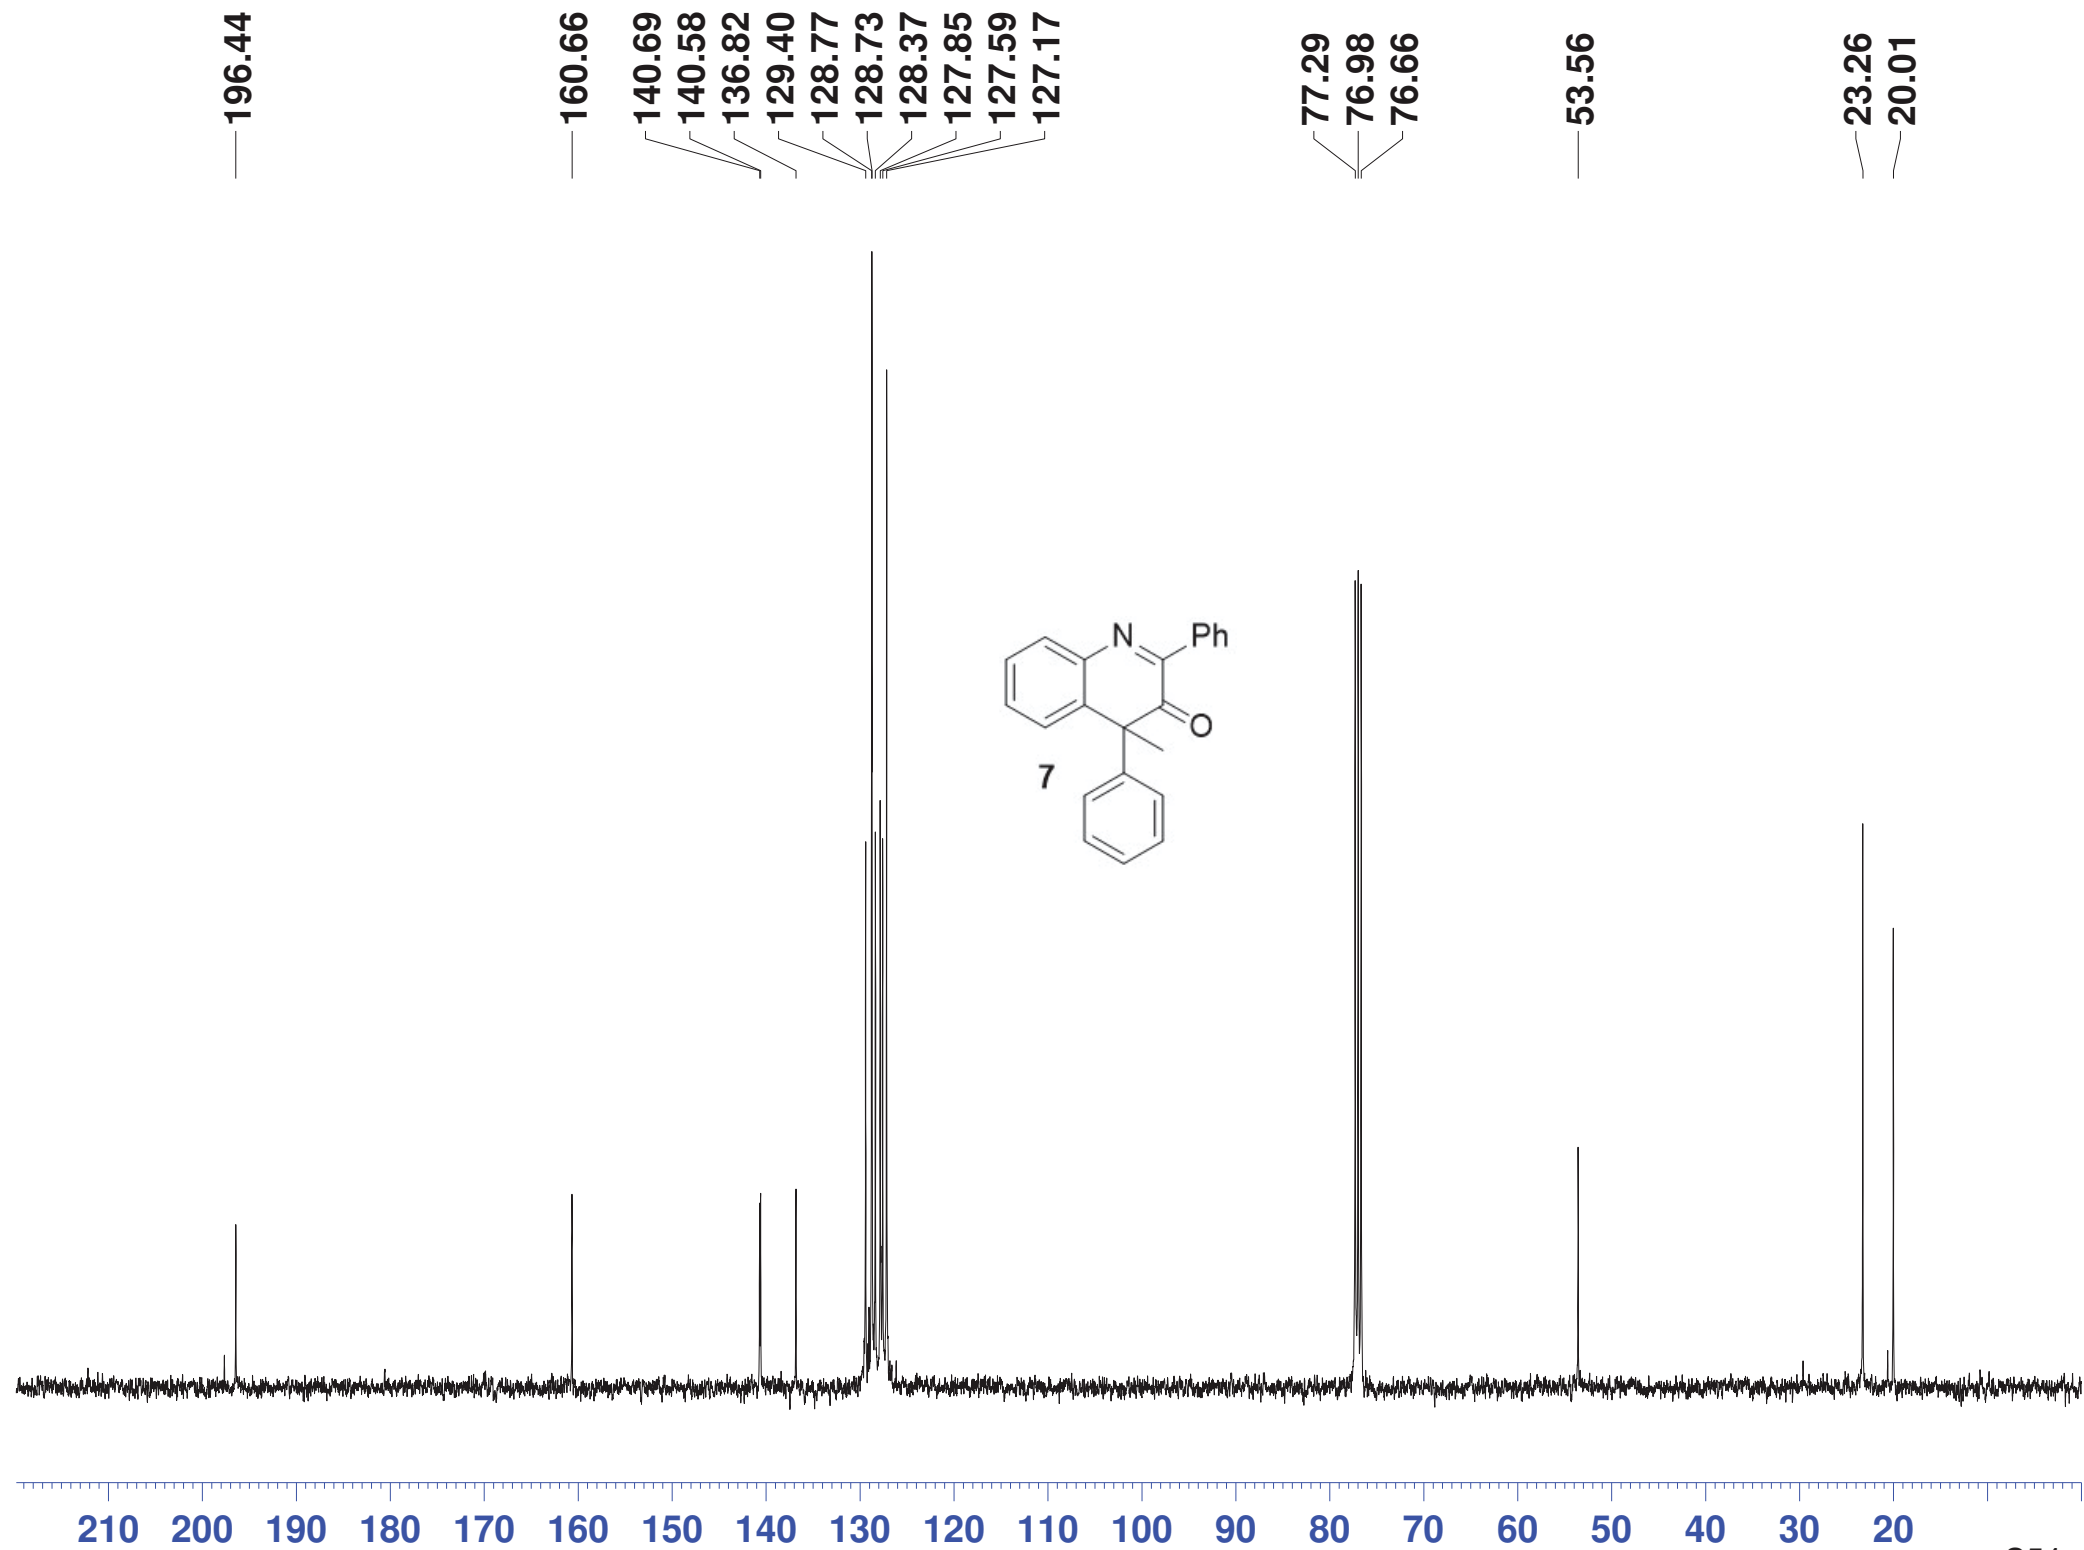

Z-Pn Pndiazonium salt, dry MeCN, styrene, 80deg, Zn, purified

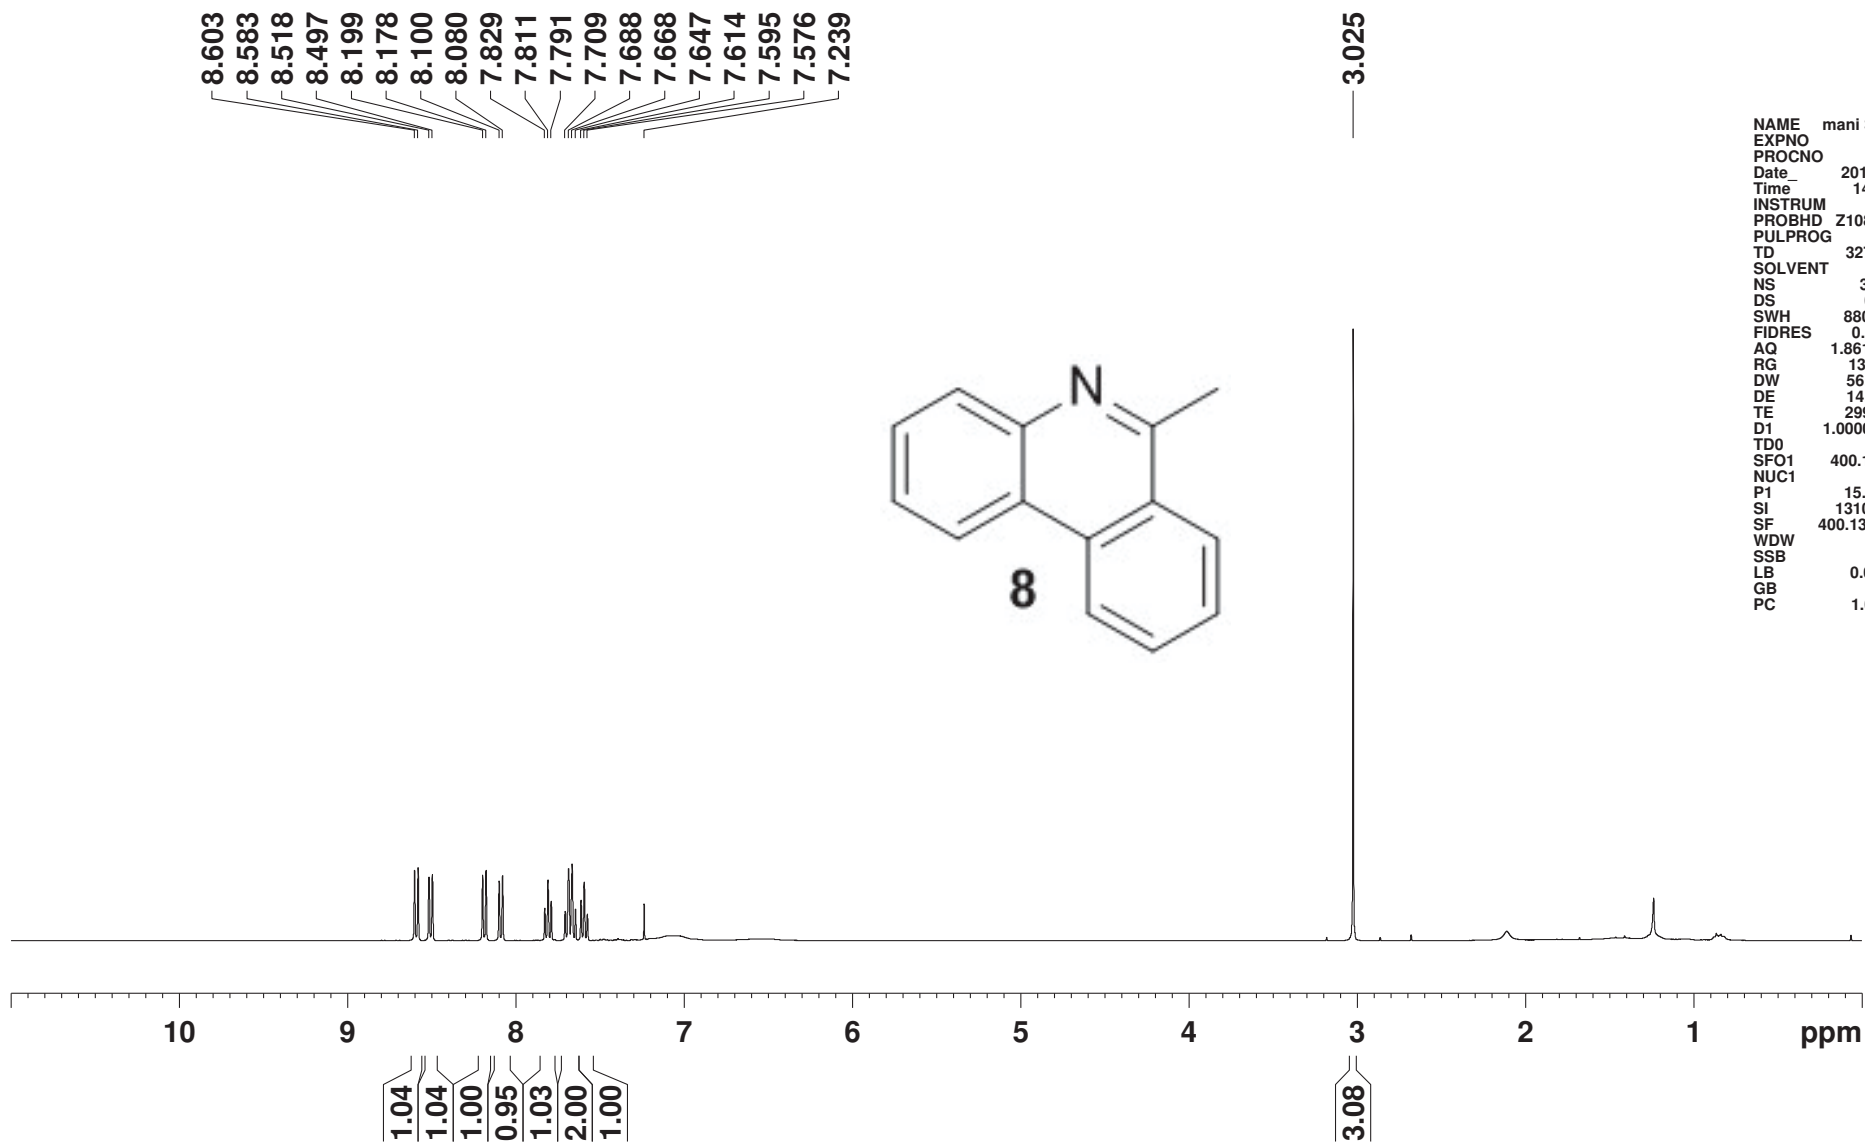

NAME mani 30-10-2017  
EXPNO 1  
PROCNO 1  
Date\_ 20171030  
Time 14.55 h  
INSTRUM spect  
PROBHD Z108618\_0411 (  
PULPROG zg30  
TD 32768  
SOLVENT CDCl3  
NS 30  
DS 0  
SWH 8802.817 Hz  
FIDRES 0.537281 Hz  
AQ 1.8612725 sec  
RG 133.5  
DW 56.800 usec  
DE 14.47 usec  
TE 299.1 K  
D1 1.00000000 sec  
TD0 1  
SFO1 400.1328009 MHz  
NUC1 1H  
P1 15.50 usec  
SI 131072  
SF 400.1300180 MHz  
WDB EM  
SSB 0  
LB 0.00 Hz  
GB 0  
PC 1.00



2-Ph Phdiazonium salt, dry MeCN, Styrene, 80deg, 2h, purified

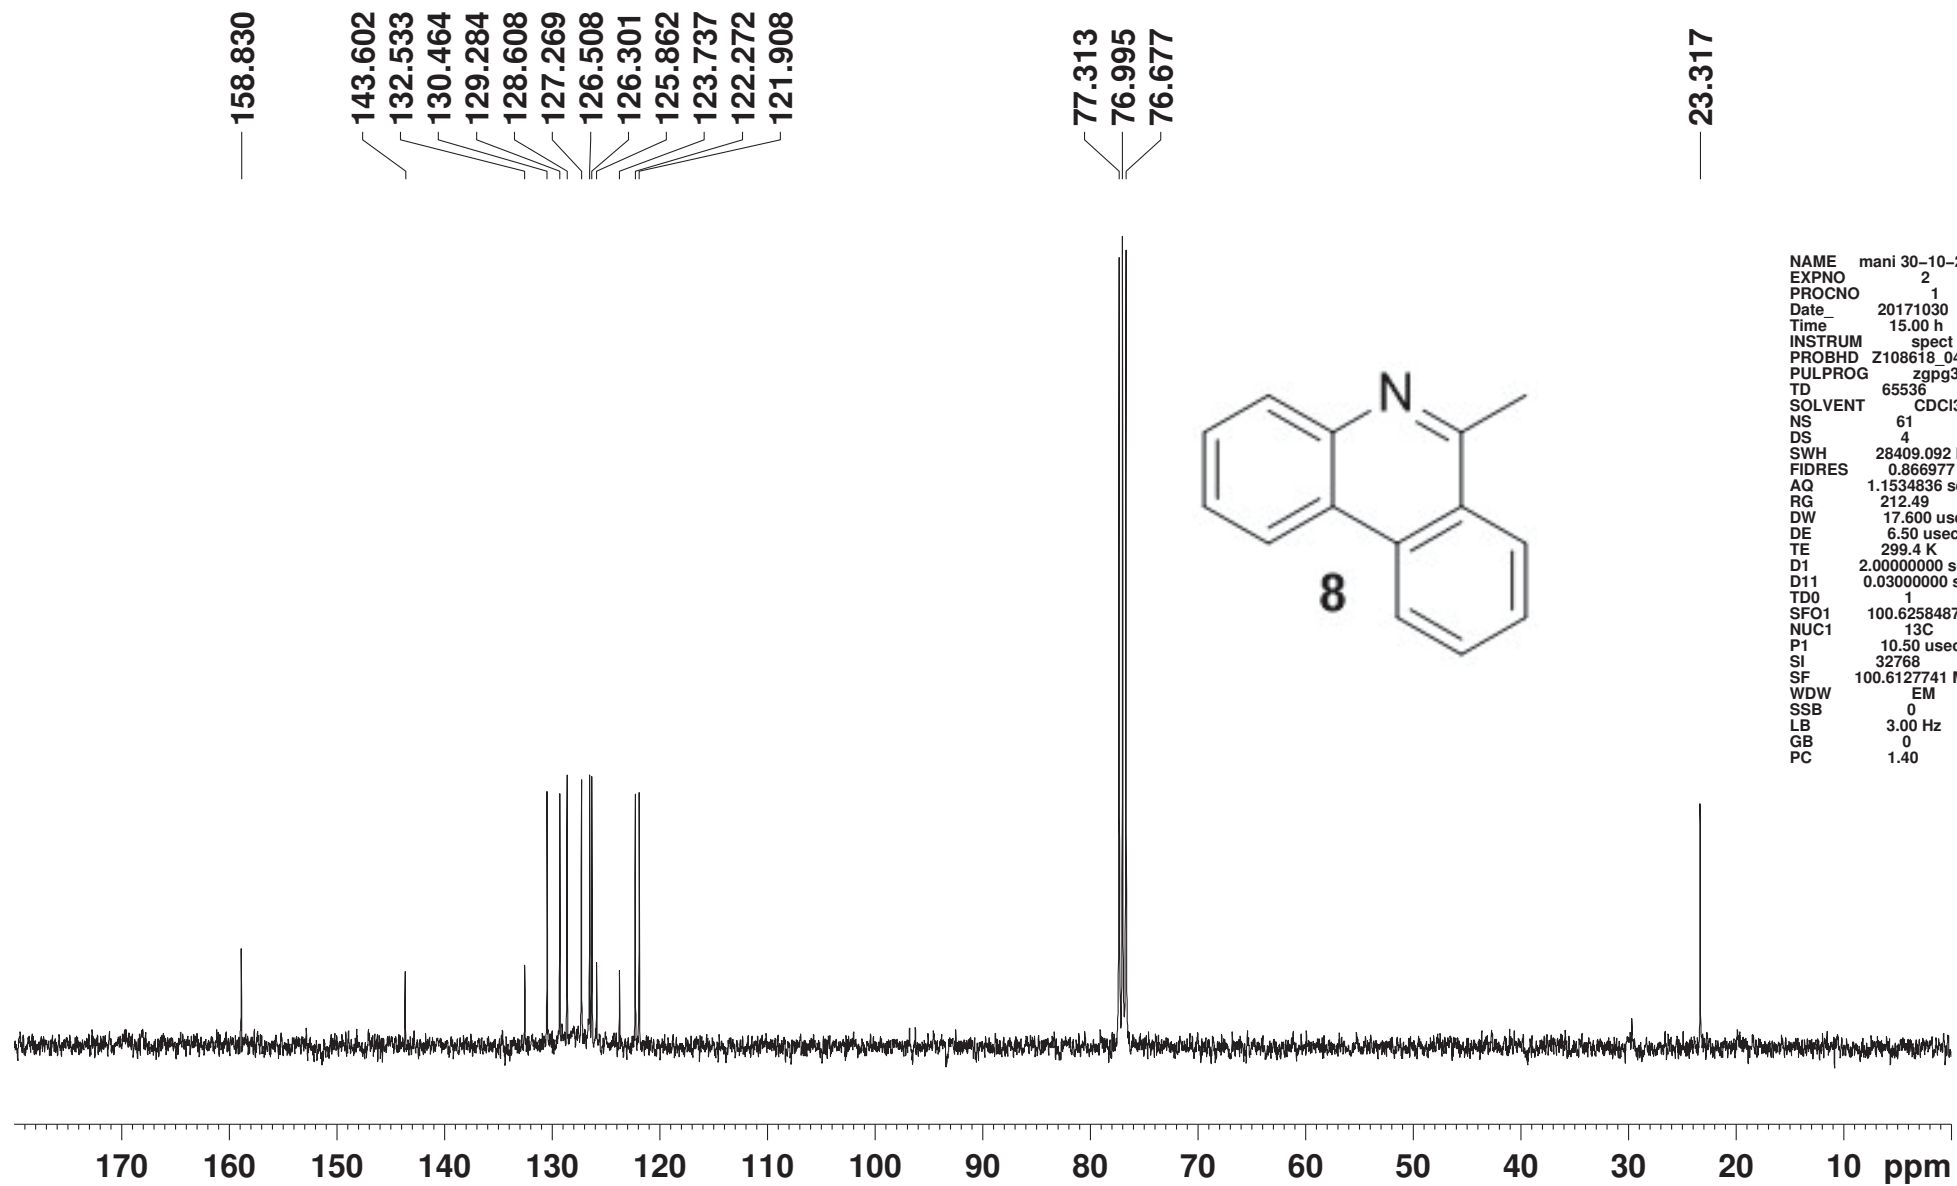

2-SMePhdiazonium salt, dry PhCN, Styrene, 80deg, 2h, purified

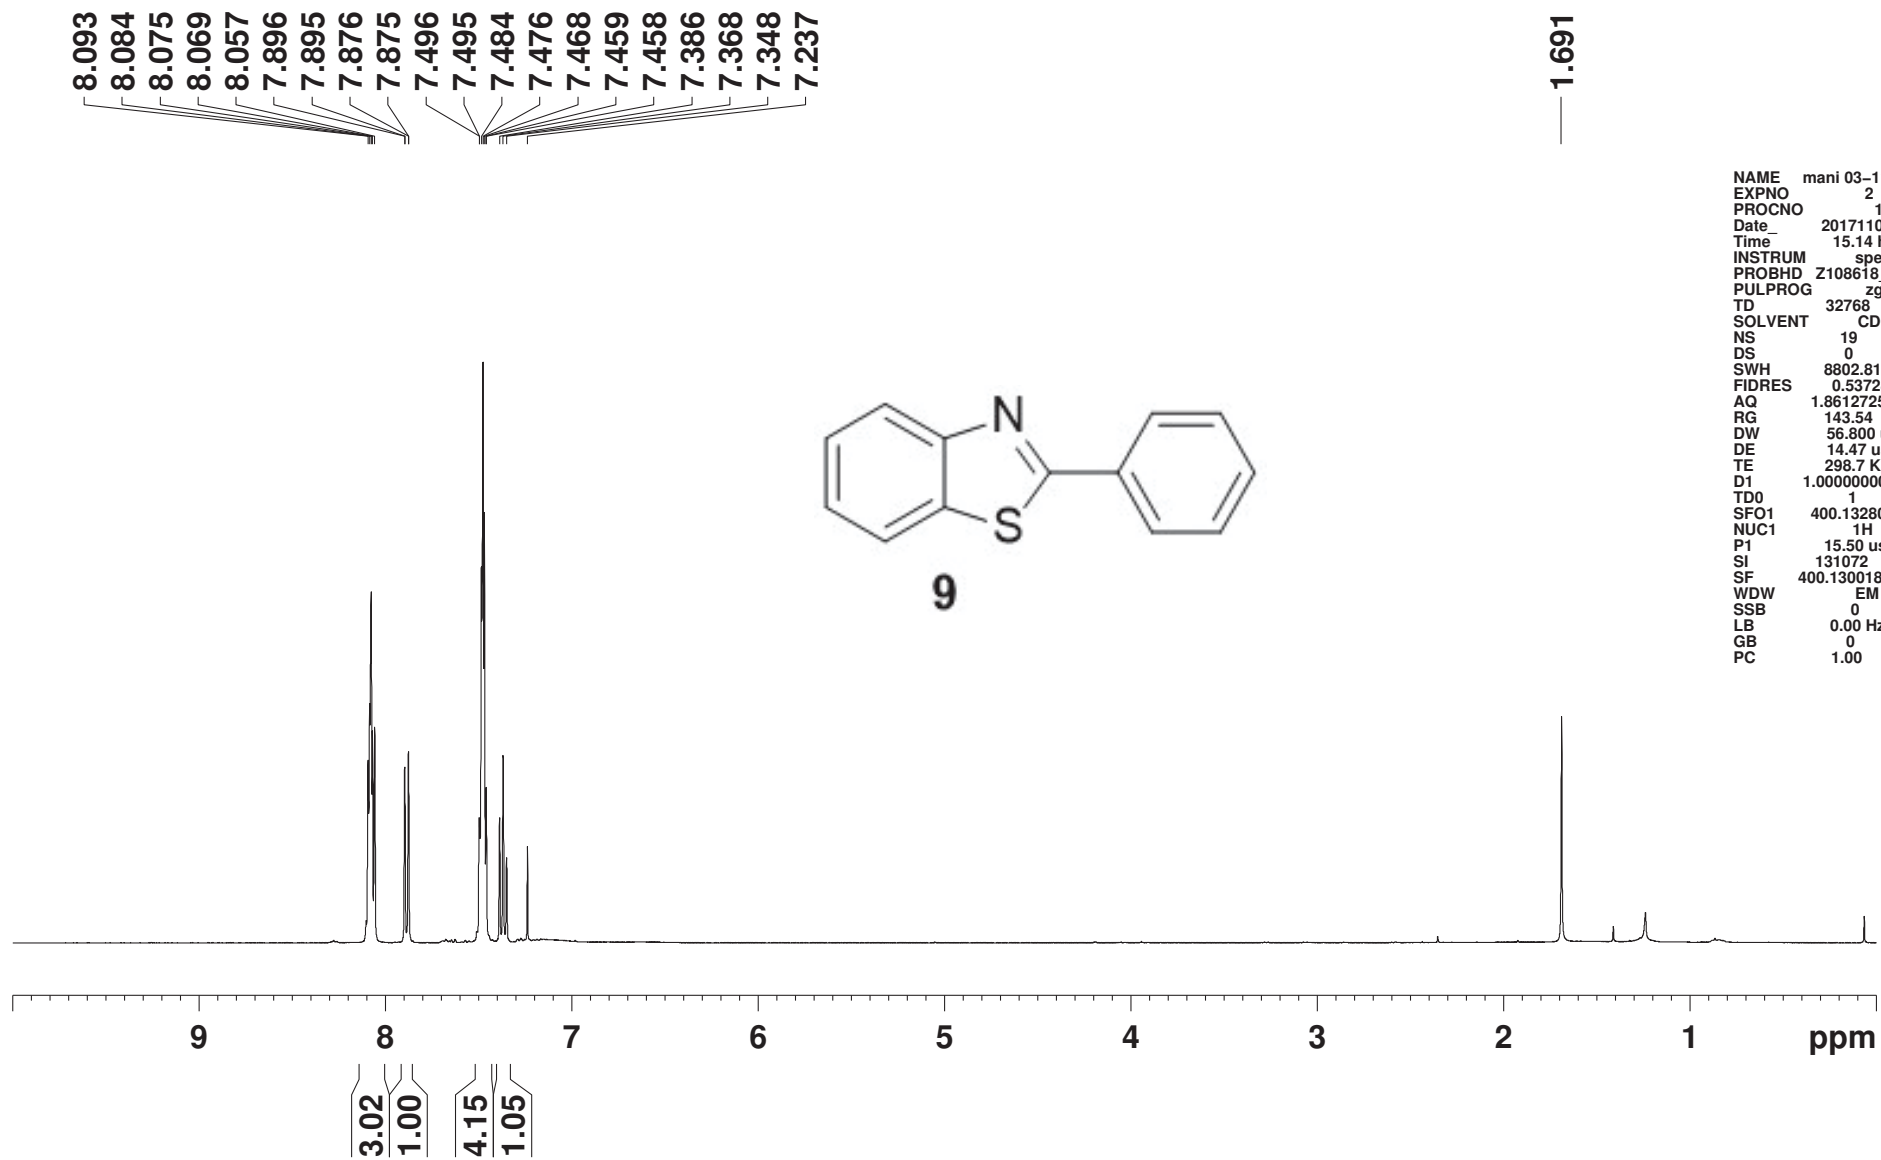

NAME mani 03-11-2017  
EXPNO 2  
PROCNO 1  
Date\_ 20171103  
Time 15.14 h  
INSTRUM spect  
PROBHD Z108618\_0411 (  
PULPROG zg30  
TD 32768  
SOLVENT CDCl3  
NS 19  
DS 0  
SWH 8802.817 Hz  
FIDRES 0.537281 Hz  
AQ 1.8612725 sec  
RG 143.54  
DW 56.600 usec  
DE 14.47 usec  
TE 298.7 K  
D1 1.00000000 sec  
TD0 1  
SFO1 400.1328009 MHz  
NUC1 1H  
P1 15.50 usec  
SI 131072  
SF 400.1300189 MHz  
WDW EM  
SSB 0  
LB 0.00 Hz  
GB 0  
PC 1.00

2-SMePhdiazonium salt, dry PhCN, Styrene, 80deg, 2h, purified

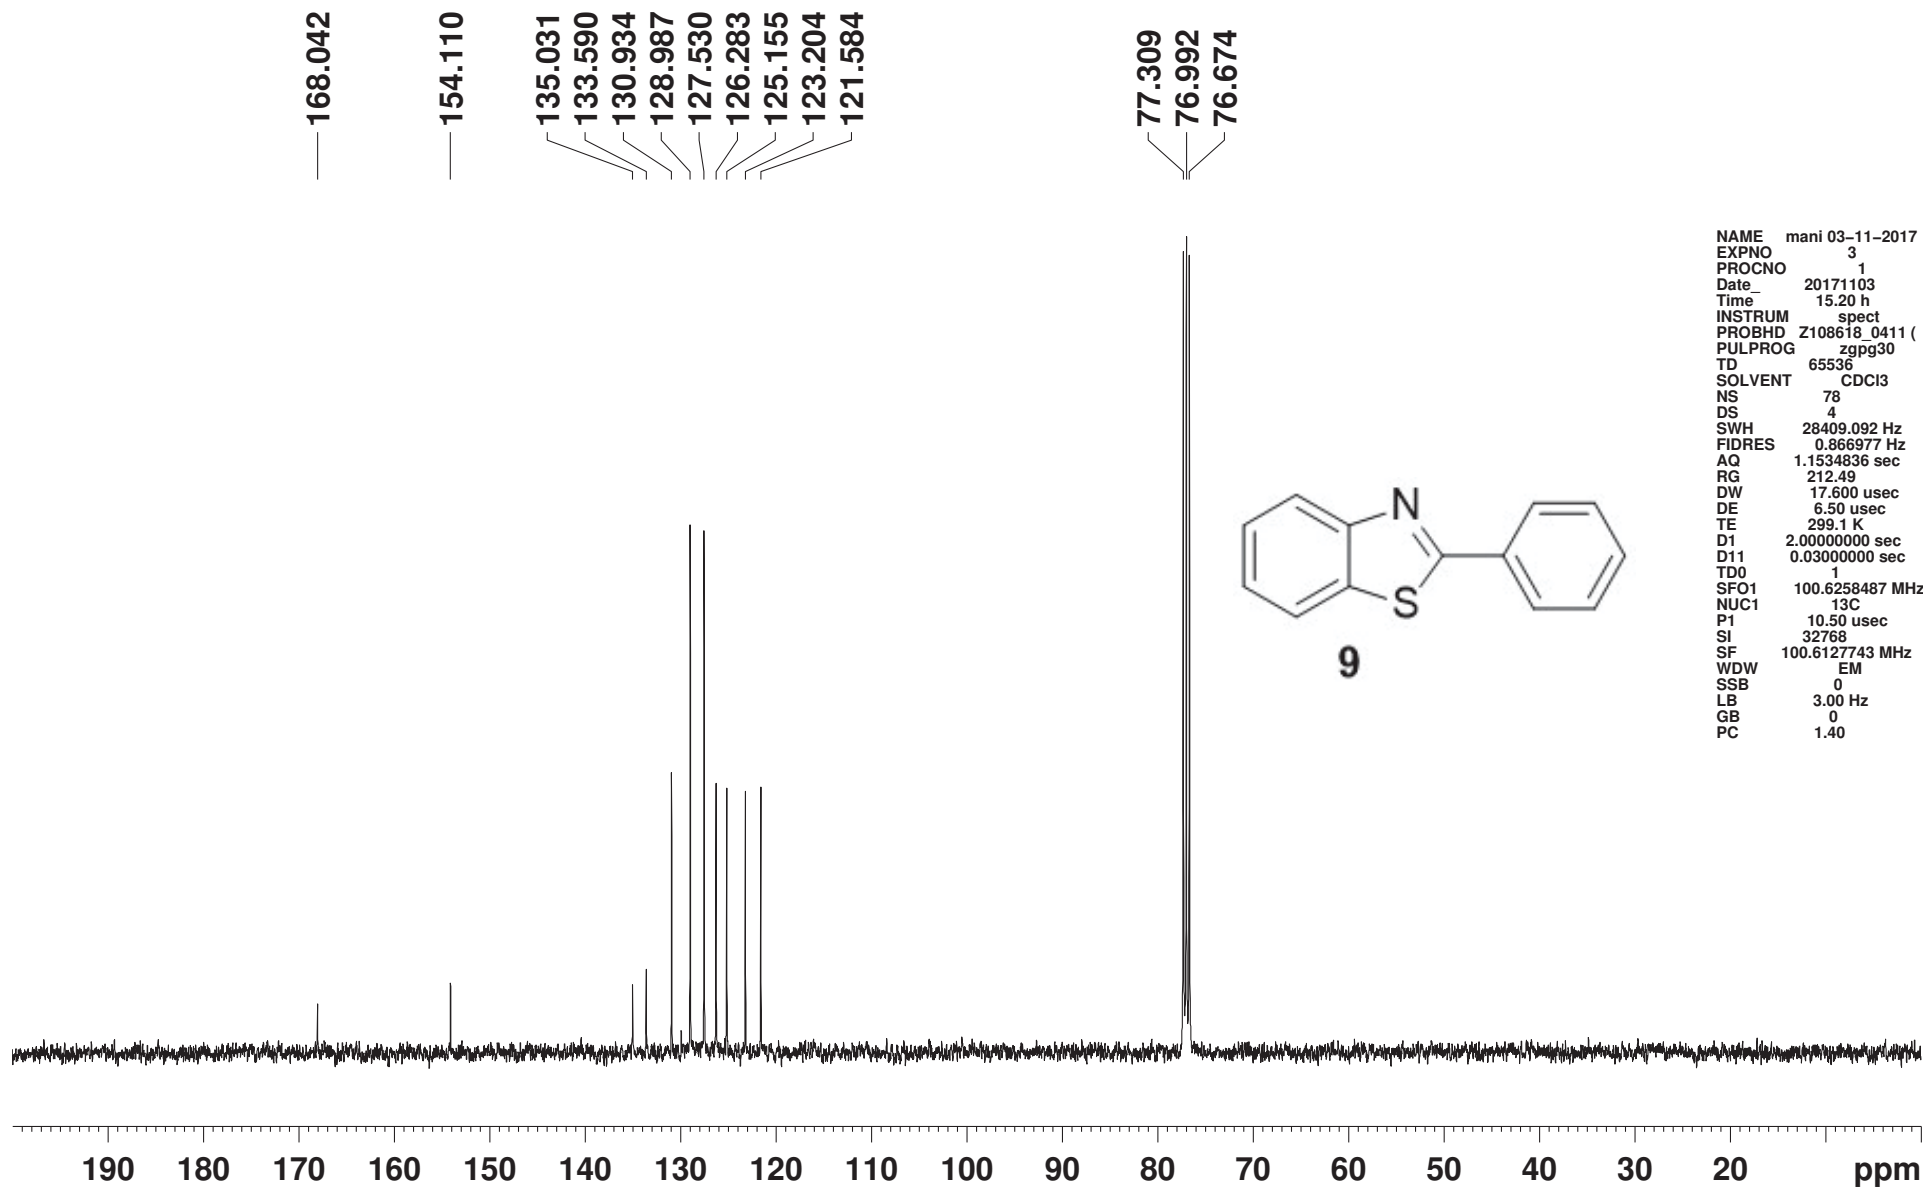

NAME mani 03-11-2017  
EXPNO 3  
PROCNO 1  
Date\_ 20171103  
Time 15.20 h  
INSTRUM spect  
PROBHD Z108618\_0411 (  
PULPROG zgpg30  
TD 65536  
SOLVENT CDCl3  
NS 78  
DS 4  
SWH 28409.092 Hz  
FIDRES 0.866977 Hz  
AQ 1.1534836 sec  
RG 212.49  
DW 17.600 usec  
DE 6.50 usec  
TE 299.1 K  
D1 2.0000000 sec  
D11 0.03000000 sec  
TD0 1  
SFO1 100.6258487 MHz  
NUC1 13C  
P1 10.50 usec  
SI 32768  
SF 100.6127743 MHz  
WDW EM  
SSB 0  
LB 3.00 Hz  
GB 0  
PC 1.40

2-methyl quinoline, purified brown viscous oil

7.989  
7.968  
7.942  
7.928  
7.908  
7.672  
7.652  
7.616  
7.598  
7.596  
7.577  
7.409  
7.403  
7.384  
7.372  
7.366  
7.238  
7.183  
7.170  
7.163  
7.150

2.666

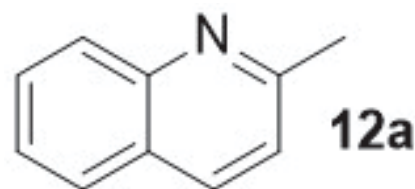

NAME mani 01-06-2018  
EXPNO 1  
PROCNO 1  
Date\_ 20180601  
Time 13.16 h  
INSTRUM spect  
PROBHD Z108618\_0411 (  
PULPROG zg30  
TD 32768  
SOLVENT CDCl3  
NS 16  
DS 0  
SWH 8802.817 Hz  
FIDRES 0.537281 Hz  
AQ 1.8612725 sec  
RG 31.38  
DW 56.800 usec  
DE 14.47 usec  
TE 299.3 K  
D1 1.00000000 sec  
TD0 1  
SFO1 400.1328009 MHz  
NUC1 1H  
P1 15.50 usec  
SI 131072  
SF 400.1300186 MHz  
WDW EM  
SSB 0  
LB 0.00 Hz  
GB 0  
PC 1.00

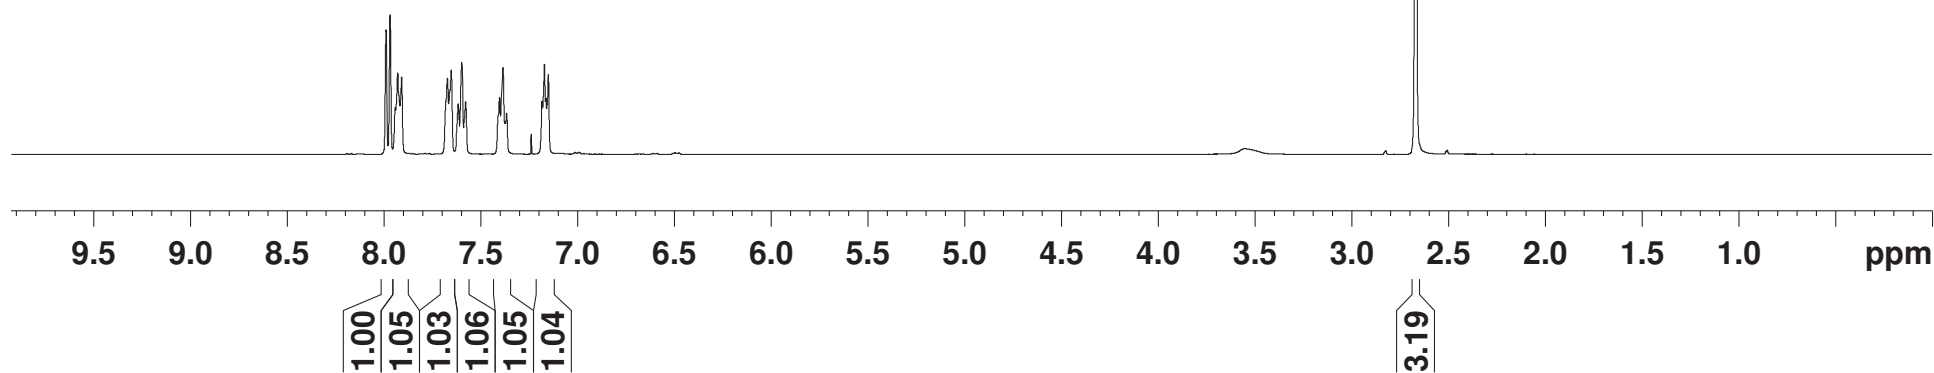

2-methyl quinoline, purified brown viscous oil

NAME mani 01-06-2018  
EXPNO 2  
PROCNO 1  
Date 20180601  
Time 13.21 h  
INSTRUM spect  
PROBHD Z108618\_0411 (  
PULPROG zgpg30  
TD 65536  
SOLVENT CDCl3  
NS 62  
DS 4  
SWH 28409.092 Hz  
FIDRES 0.866977 Hz  
AQ 1.1534836 sec  
RG 212.49  
DW 17.600 usec  
DE 6.50 usec  
TE 299.7 K  
D1 2.00000000 sec  
D11 0.03000000 sec  
TD0 1  
SFO1 100.6258487 MHz  
NUC1 13C  
P1 10.50 usec  
SI 32768  
SF 100.6127859 MHz  
WDW EM  
SSB 0  
LB 3.00 Hz  
GB 0  
PC 1.40

158.738  
147.607  
135.994  
129.238  
128.373  
127.295  
126.285  
125.477  
121.781

77.310  
76.992  
76.674

25.126

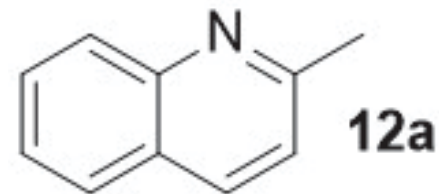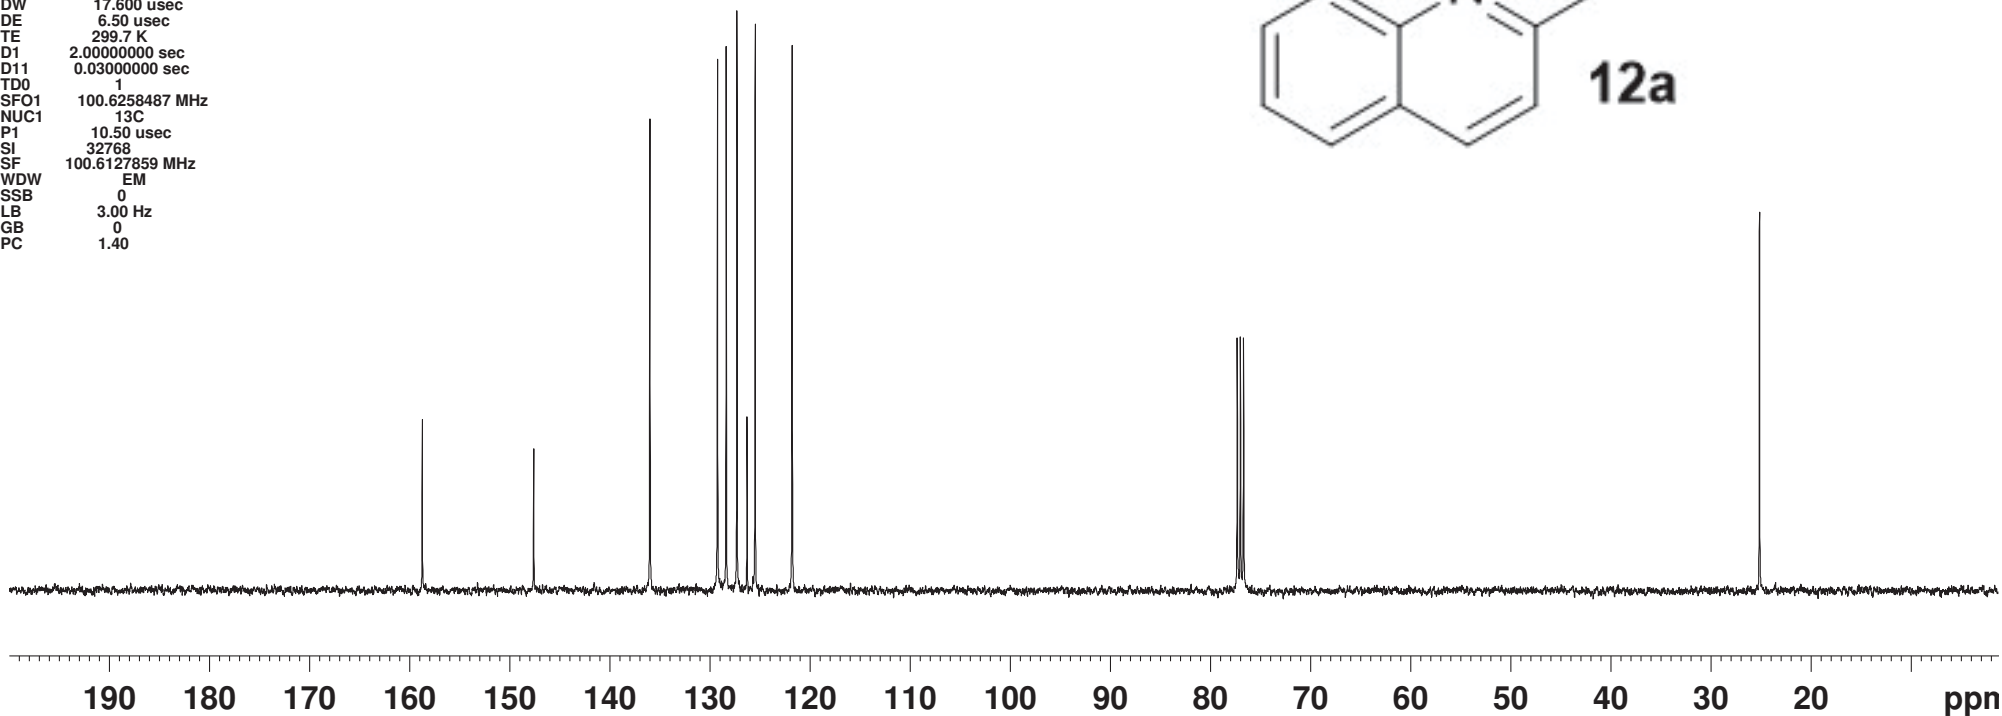

2-butylquinoline, pale yellow oil

8.058  
8.050  
8.037  
8.028  
7.764  
7.743  
7.680  
7.676  
7.662  
7.659  
7.641  
7.638  
7.479  
7.459  
7.441  
7.288  
7.267  
7.238

2.959  
2.940  
2.920  
1.878  
1.860  
1.841  
1.822  
1.803  
1.784  
1.021  
1.002  
0.984

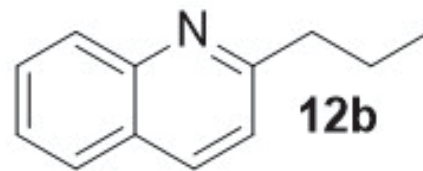

NAME mani 14-12-  
EXPNO 1  
PROCNO 1  
Date\_ 20171214  
Time\_ 14.50 h  
INSTRUM spect  
PROBHD Z108618\_0  
PULPROG zg3i  
TD 32768  
SOLVENT CDCl  
NS 30  
DS 0  
SWH 8802.817  
FIDRES 0.537281  
AQ 1.8612725 s  
RG 188.2  
DW 56.800 usec  
DE 14.47 usec  
TE 299.0 K  
D1 1.0000000 s  
TD0 1  
SFO1 400.132800  
NUC1 1H  
P1 15.50 usec  
SI 131072  
SF 400.1300184  
WDW EM  
SSB 0  
LB 0.00 Hz  
GB 0  
PC 1.00

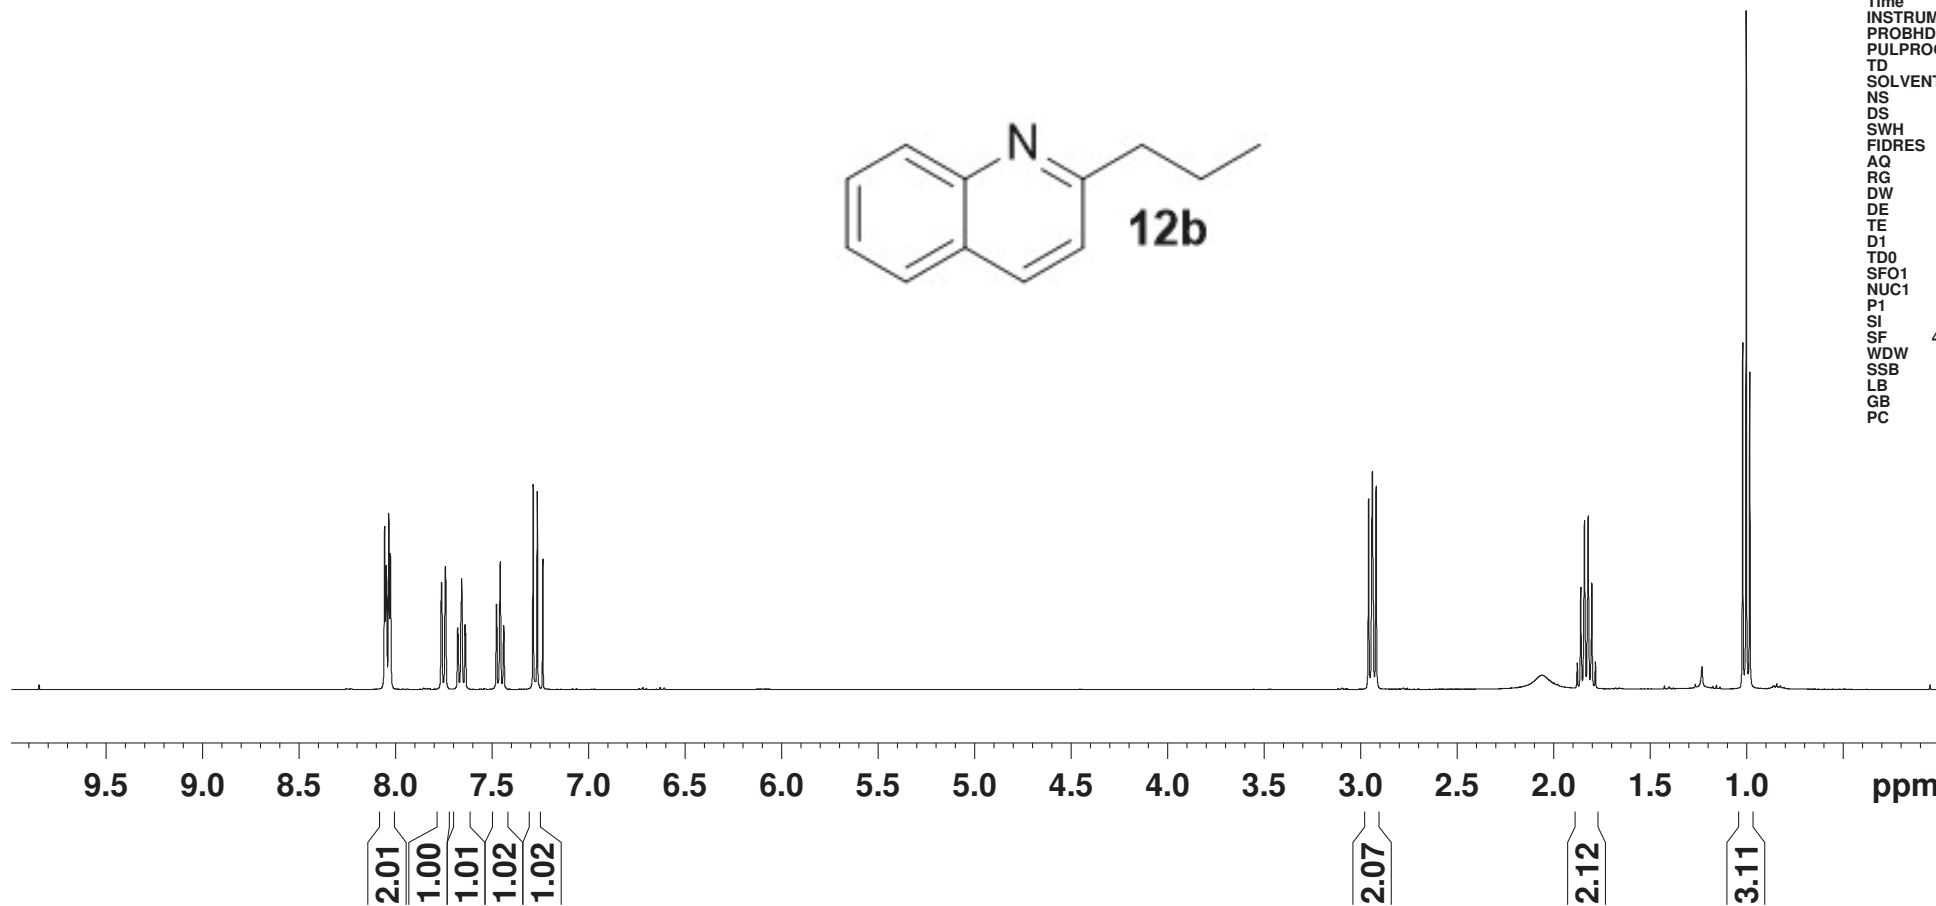

2-butylquinoline, pale yellow oil

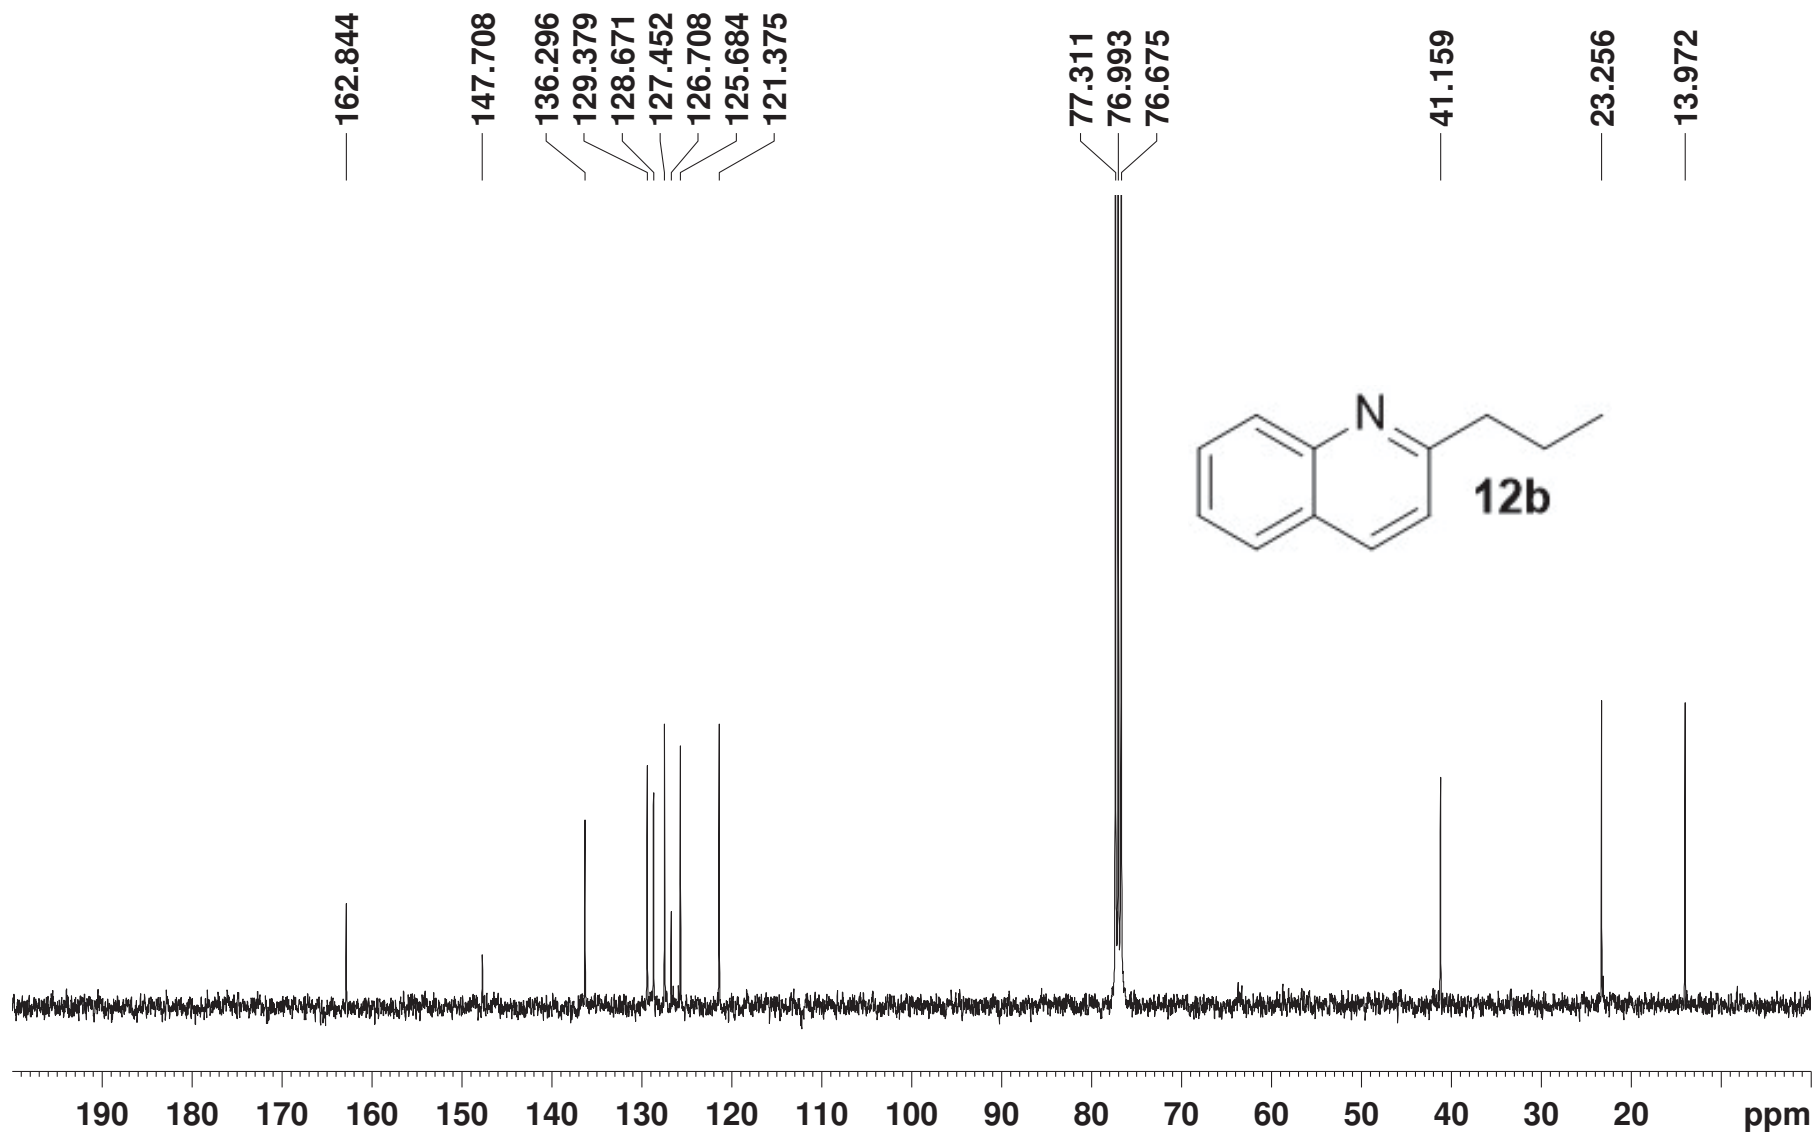

2-isopropyl quinoline, pale yellow oil, purified

8.067  
8.046  
8.019  
7.998  
7.715  
7.695  
7.654  
7.650  
7.636  
7.633  
7.630  
7.615  
7.612  
7.440  
7.421  
7.403  
7.286  
7.265

3.298  
3.281  
3.263  
3.246  
3.229  
3.211  
3.194

1.384  
1.367

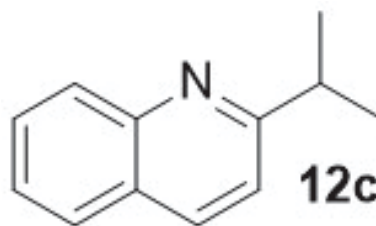

NAME mani 1-12-2017  
EXPNO 1  
PROCNO 1  
Date\_ 20171201  
Time\_ 14.05 h  
INSTRUM spect  
PROBHD Z108618\_0411 (  
PULPROG zg30  
TD 32768  
SOLVENT CDCl3  
NS 22  
DS 0  
SWH 8802.817 Hz  
FIDRES 0.537281 Hz  
AQ 1.8612725 sec  
RG 31.38  
DW 56.800 usec  
DE 14.47 usec  
TE 298.5 K  
D1 1.00000000 sec  
TD0 1  
SFO1 400.1328009 MHz  
NUC1 1H  
P1 15.50 usec  
SI 131072  
SF 400.1300178 MHz  
WDW EM  
SSB 0  
LB 0.00 Hz  
GB 0  
PC 1.00

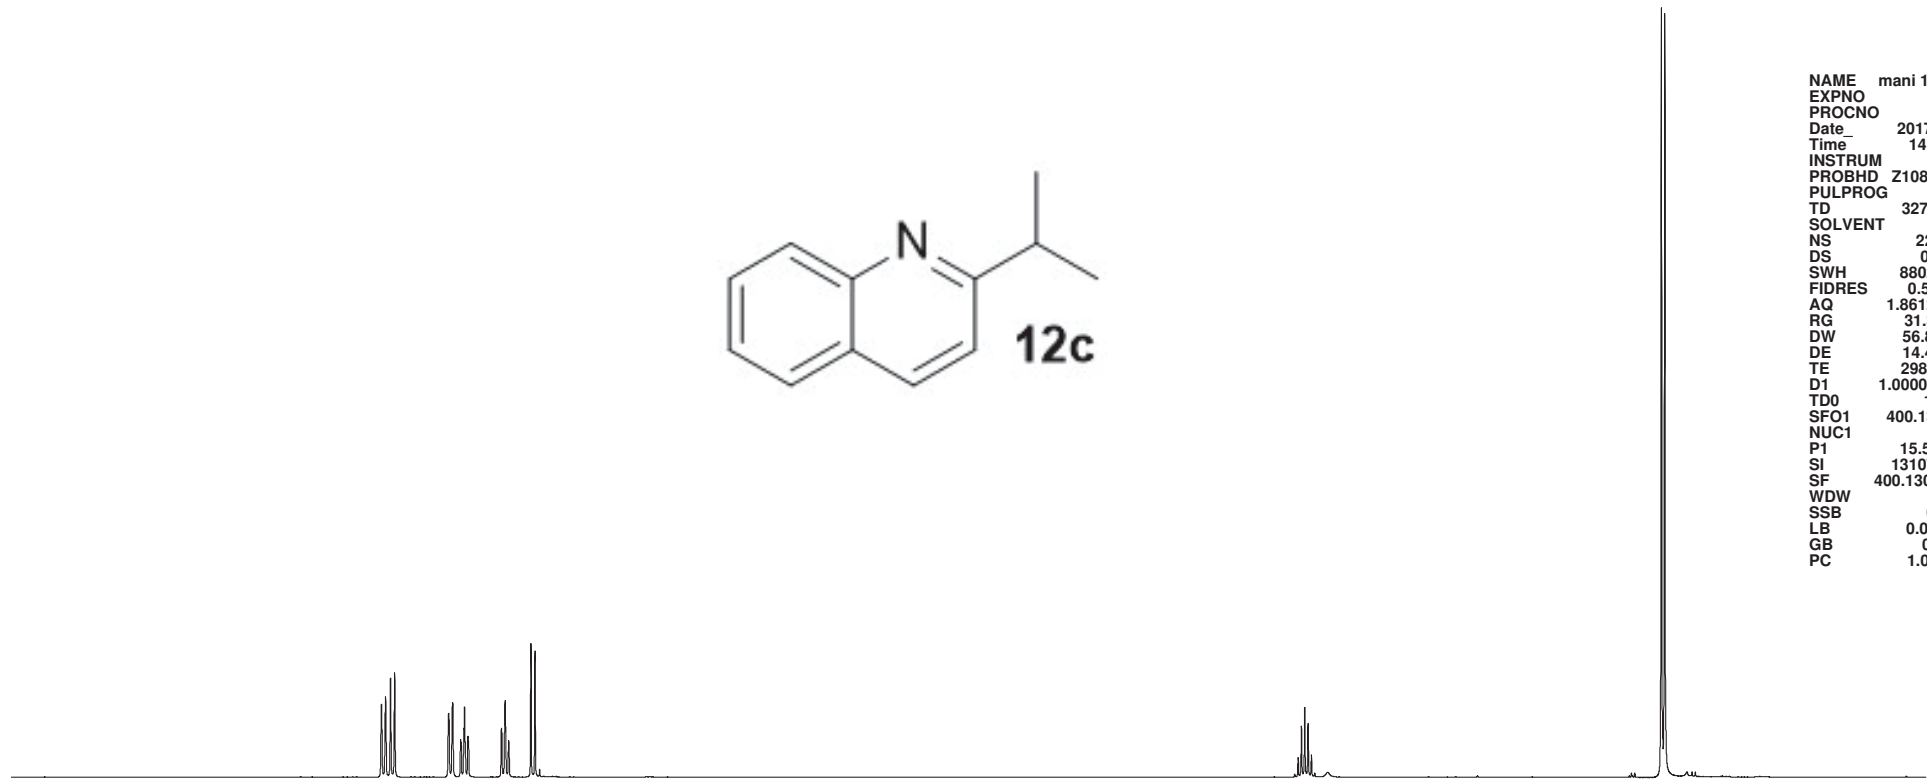

9.5 9.0 8.5 8.0 7.5 7.0 6.5 6.0 5.5 5.0 4.5 4.0 3.5 3.0 2.5 2.0 1.5 1.0 ppm

1.00  
1.04  
1.03  
1.04  
1.03  
1.05

1.04

3.15  
3.16



2-isopropyl quinoline, pale yellow oil, purified

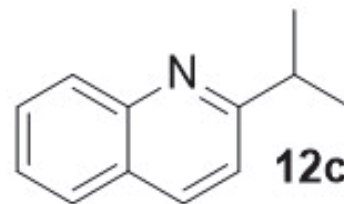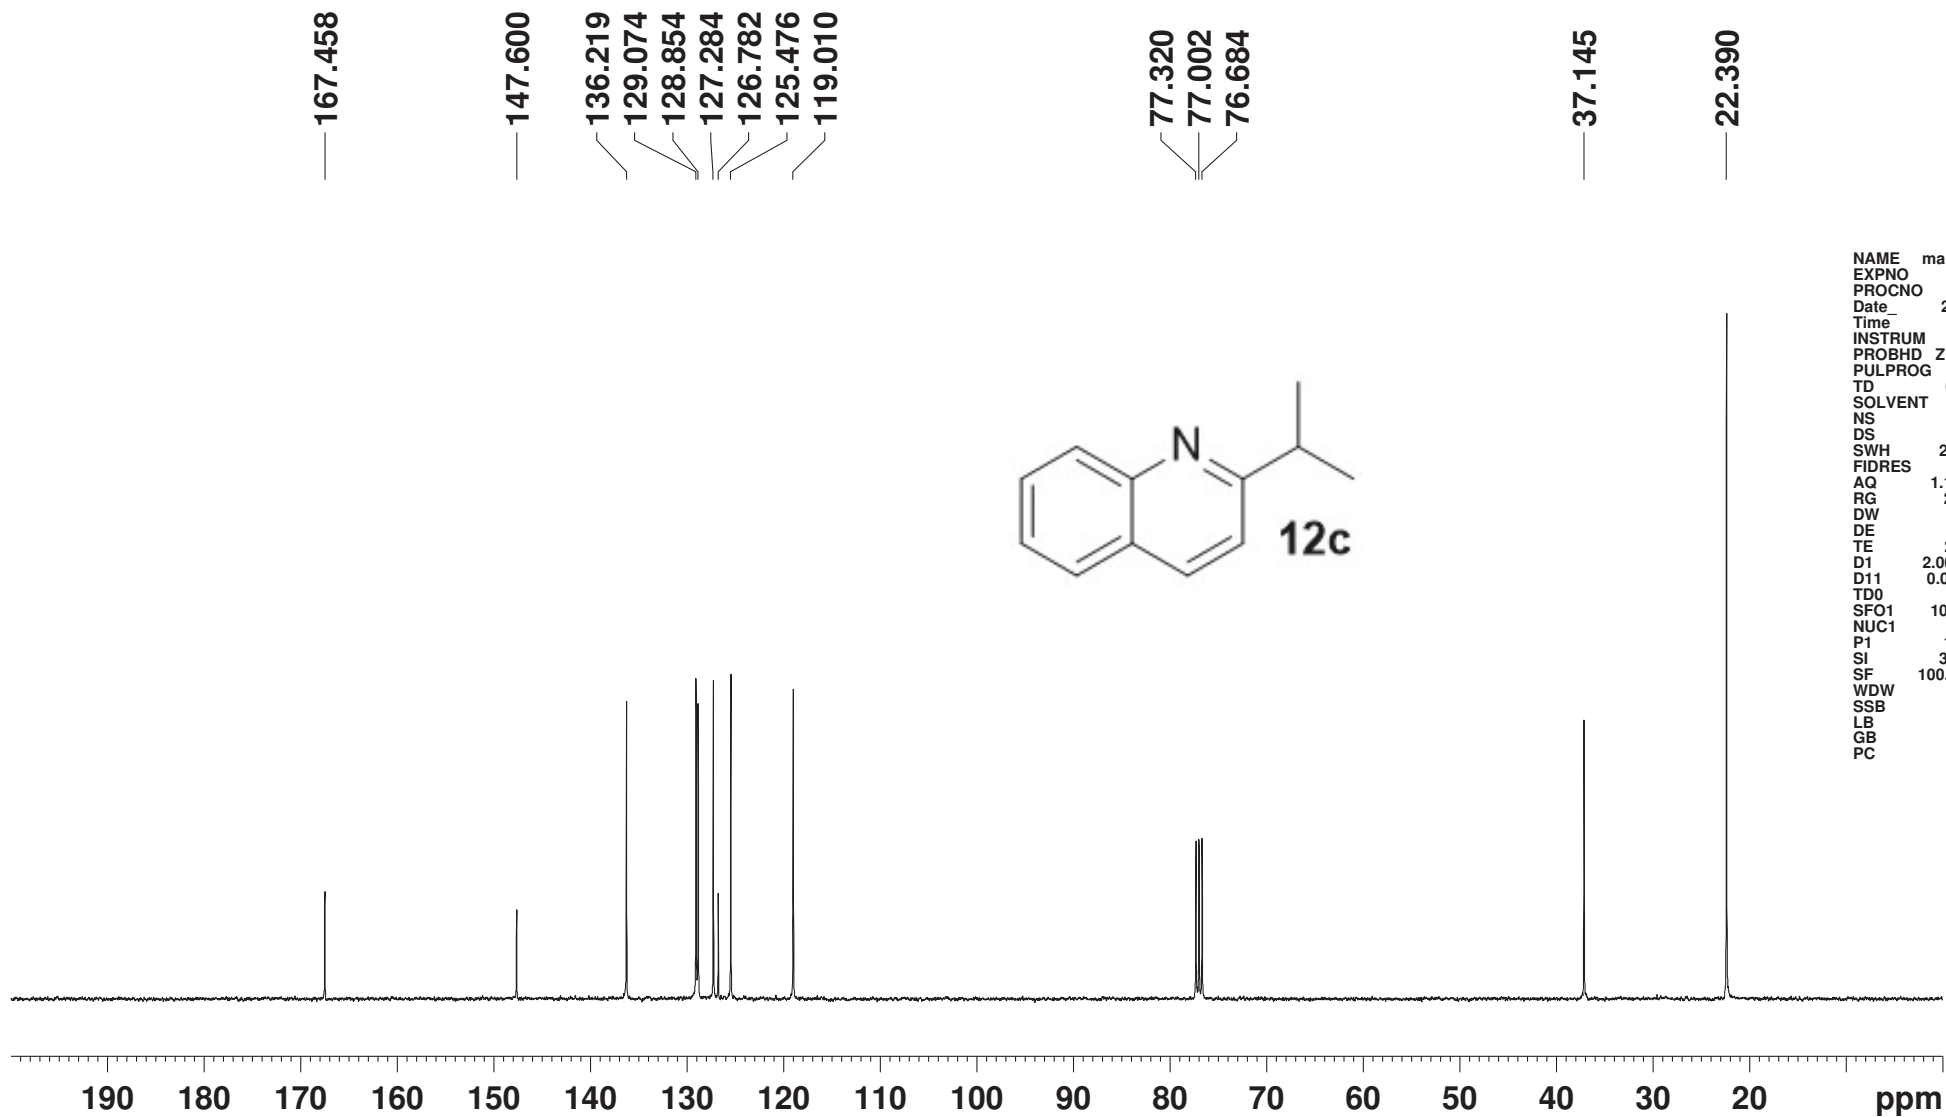

NAME mani 1-12-  
EXPNO 2  
PROCNO 1  
Date\_ 2017120  
Time 14.11 h  
INSTRUM spect  
PROBHD Z108618  
PULPROG zgpg  
TD 65536  
SOLVENT CDCl  
NS 79  
DS 4  
SWH 28409.09  
FIDRES 0.86697  
AQ 1.1534836  
RG 212.49  
DW 17.600 u  
DE 6.50 us  
TE 299.1 K  
D1 2.0000000  
D11 0.0300000  
TD0 1  
SFO1 100.62584  
NUC1 13C  
P1 10.50 us  
SI 32768  
SF 100.612785  
WDW EM  
SSB 0  
LB 3.00 Hz  
GB 0  
PC 1.40

2-phenyl quinoline, purified off-white solid

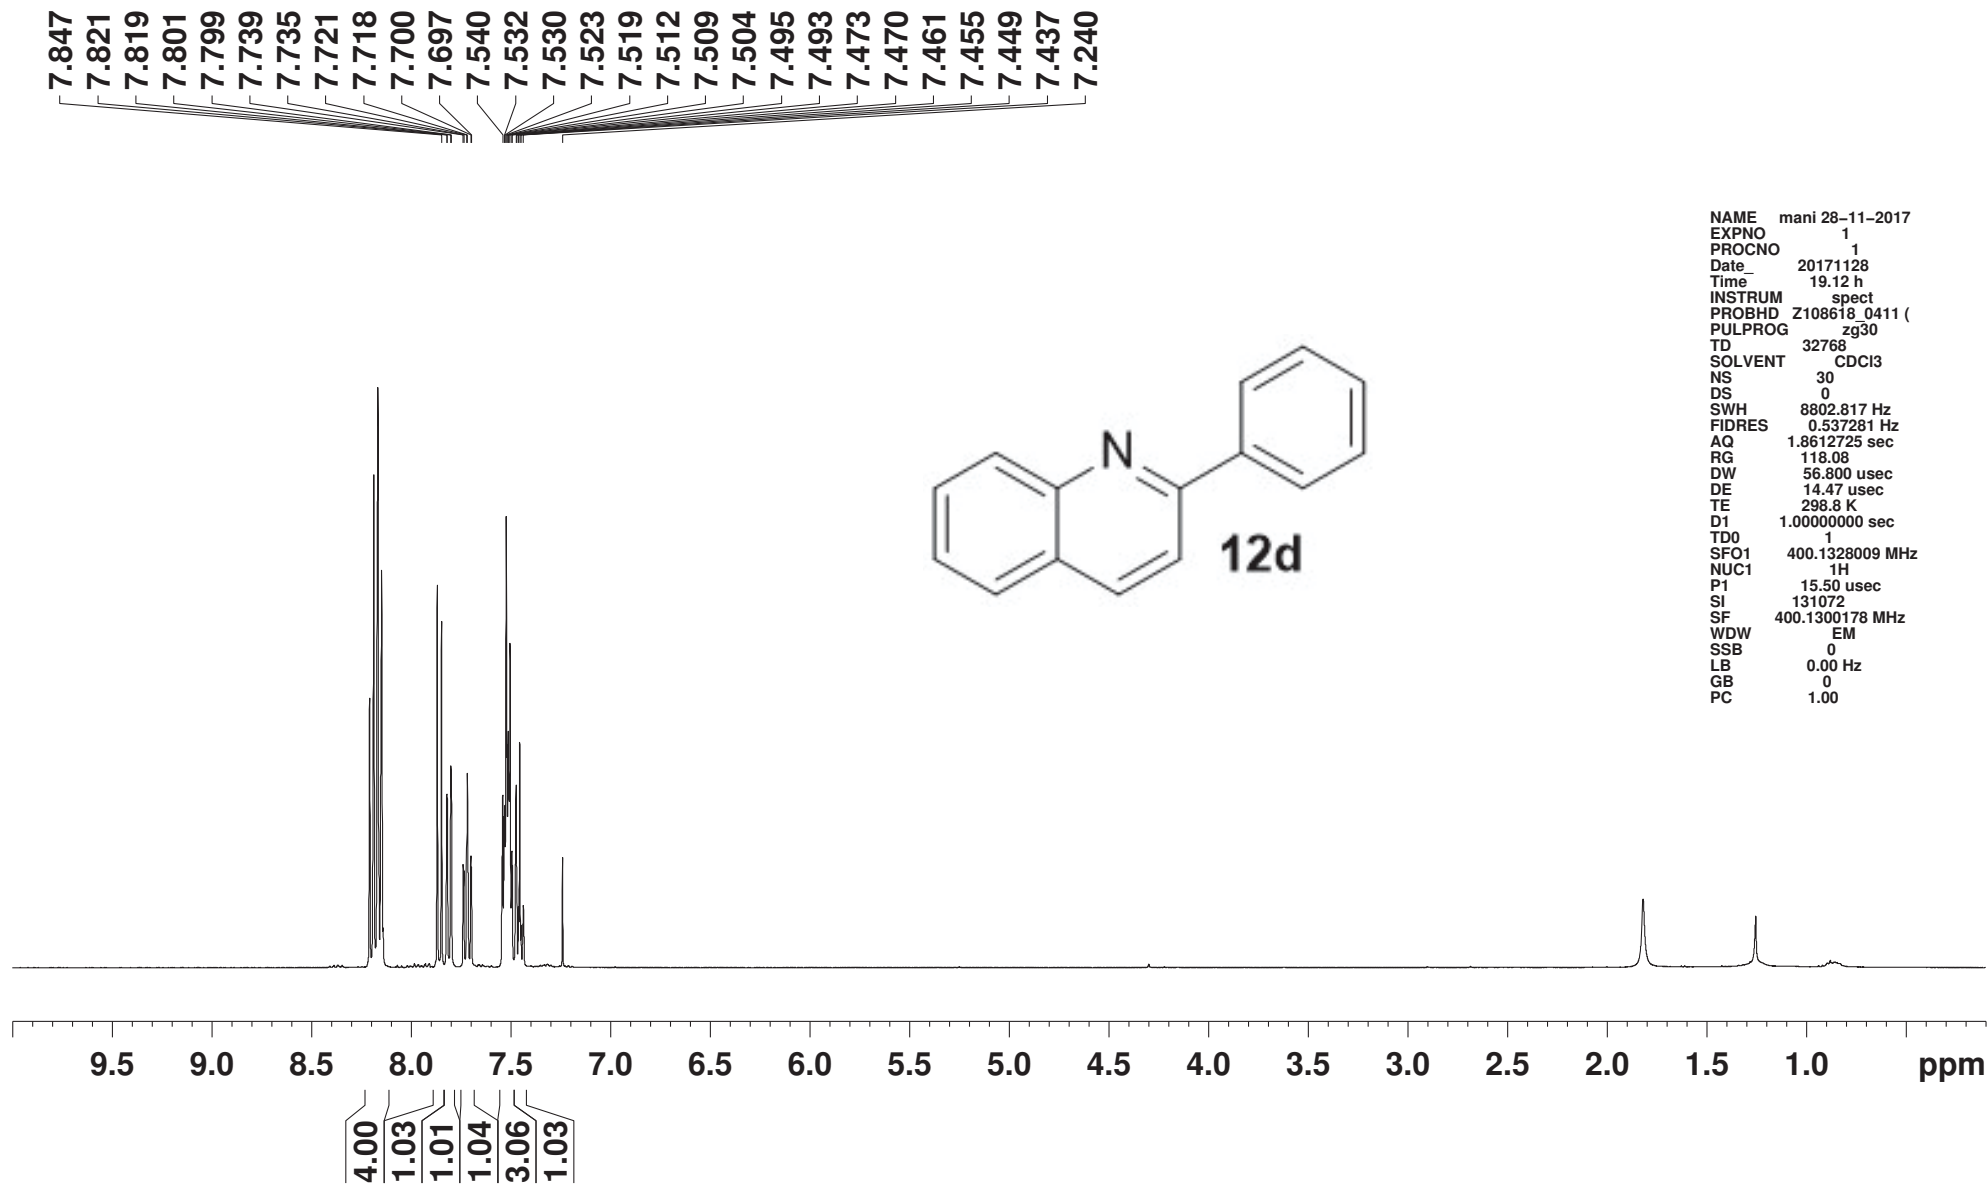

2-phenyl quinoline, purified off-white solid

157.343  
148.244  
139.647  
136.762  
129.694  
129.639  
129.298  
128.815  
127.558  
127.432  
127.159  
126.258  
118.990

77.326  
77.008  
76.691

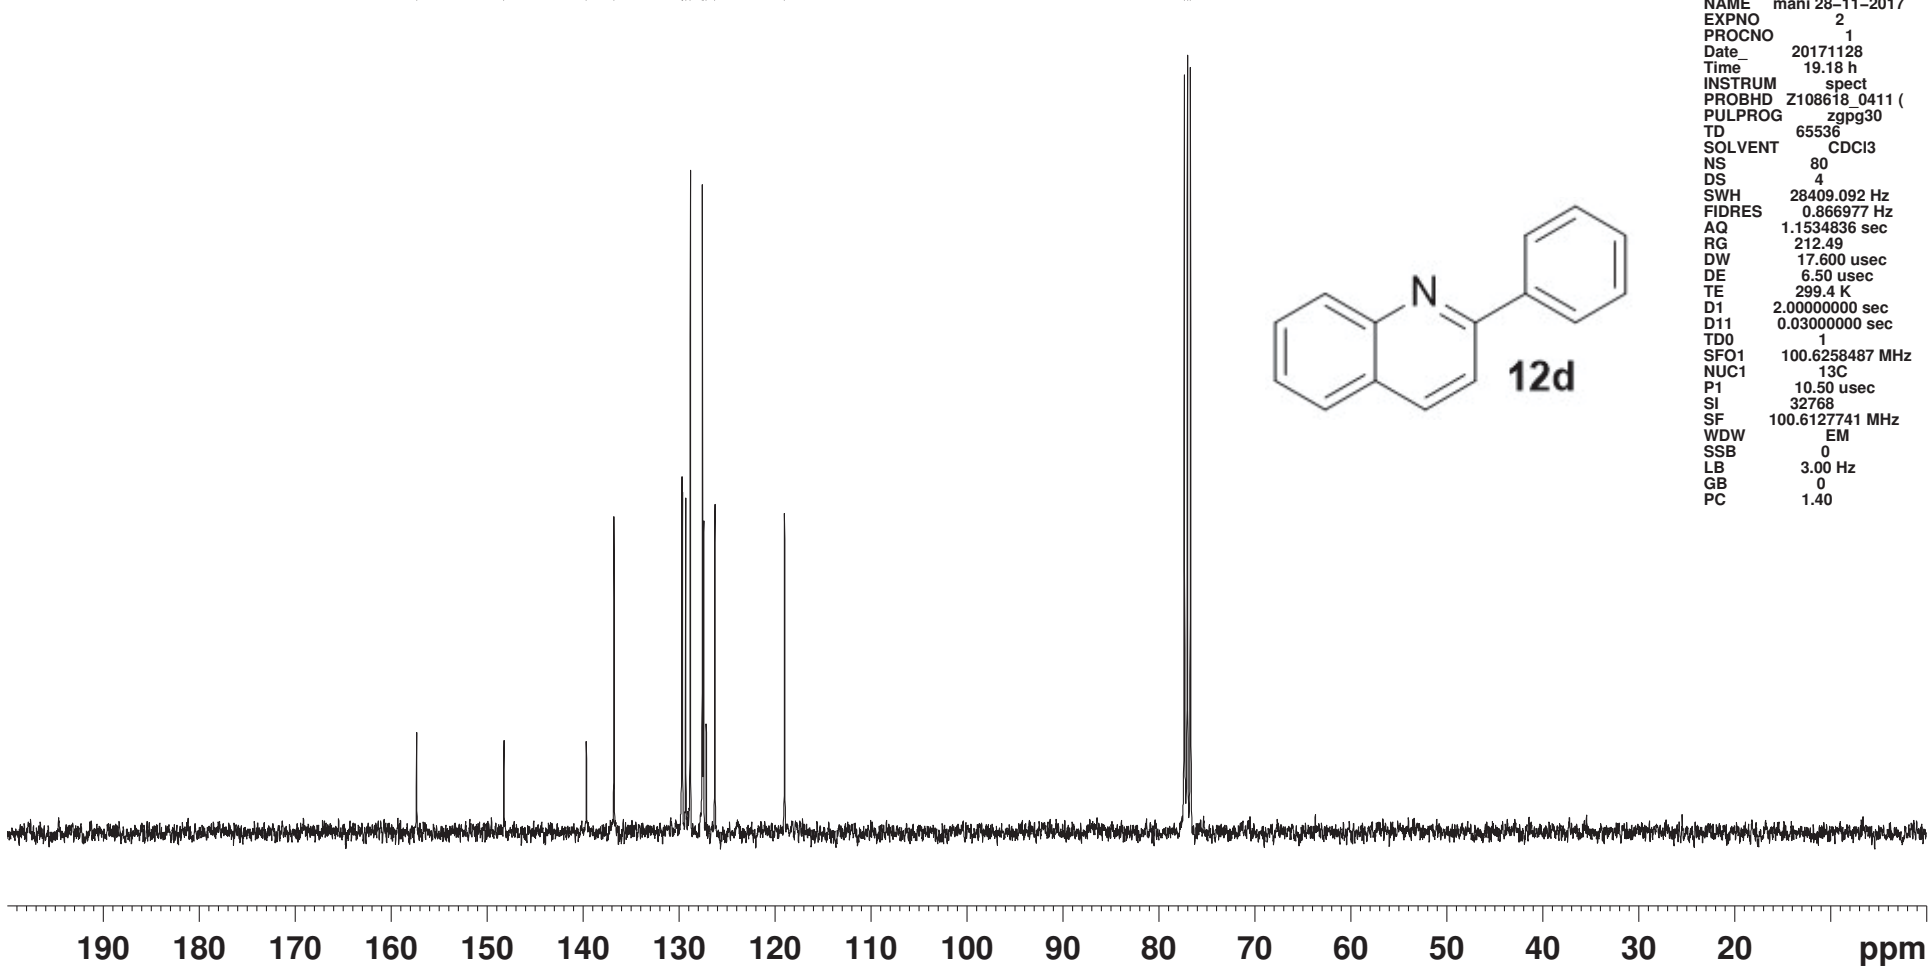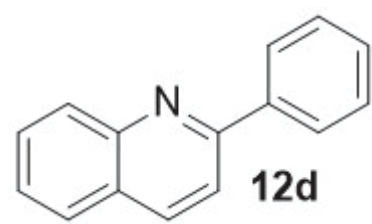

NAME mani 28-11-2017  
EXPNO 2  
PROCNO 1  
Date\_ 20171128  
Time 19.18 h  
INSTRUM spect  
PROBHD Z108618\_0411 (  
PULPROG zgpg30  
TD 65536  
SOLVENT CDCl3  
NS 80  
DS 4  
SWH 28409.092 Hz  
FIDRES 0.866977 Hz  
AQ 1.1534836 sec  
RG 212.49  
DW 17.600 usec  
DE 6.50 usec  
TE 299.4 K  
D1 2.00000000 sec  
D11 0.03000000 sec  
TD0 1  
SFO1 100.6258487 MHz  
NUC1 13C  
P1 10.50 usec  
SI 32768  
SF 100.6127741 MHz  
WDW EM  
SSB 0  
LB 3.00 Hz  
GB 0  
PC 1.40
